# Supplementary material for: Comparative transcriptomics identifies the key in planta-expressed genes of Fusarium graminearum during infection of wheat varieties
Source: Front Genet. 2023 Apr 18;14:1166832. doi: 10.3389/fgene.2023.1166832 (PMC10151574; doi:10.3389/fgene.2023.1166832)
Supplement: Supplementary file 6 [file Table4.XLSX]

## Sheet: DEGs(FL)
Upregulated and Downregulated DEGs in three comparisons and in total in Fielder
24HAI VS 12HAI						36HAI VS 24HAI						36HAI VS 12HAI						Total
Upregulated(n=203)			Downregulated(n=97)			Upregulated(n=21)			Downregulated(n=28)			Upregulated(n=291)			Downregulated(n=123)			Upregulated (n=372)	Downregulatd (n=168)
gene_ID	log2FoldChange	padj	gene_ID	log2FoldChange	padj	gene_ID	log2FoldChange	padj	gene_ID	log2FoldChange	padj	gene_ID	log2FoldChange	padj	gene_ID	log2FoldChange	padj
FGSG_07543	9.16197	2.48e-09	FGSG_05784	-1.01113	0.0114718	FGSG_03175	8.30027	1.25e-05	FGSG_09548	-1.14512	0.0312306	FGSG_07543	9.84193	4.9e-12	FGSG_00529	-1.09799	0.0316613	FGSG_06278	FGSG_03063
FGSG_00071	8.67262	4.98e-07	FGSG_10264	-1.0744	0.00581996	FGSG_01960	8.19034	5.04e-05	FGSG_05574	-1.42853	0.0480562	FGSG_08946	9.1634	5.92e-08	FGSG_05784	-1.15321	0.0275887	FGSG_05720	FGSG_06688
FGSG_10543	8.56612	0.0117475	FGSG_12857	-1.17814	0.00242959	FGSG_02869	8.06975	3.14e-05	FGSG_06658	-1.63523	0.031211	FGSG_03190	8.89244	4.16e-09	FGSG_03312	-1.17132	0.0297489	FGSG_00067	FGSG_07467
FGSG_06463	8.55537	2.67e-08	FGSG_07467	-1.25571	0.000148749	FGSG_03635	7.53744	0.000903393	FGSG_10411	-1.71547	0.0480562	FGSG_03422	8.55489	1.68e-06	FGSG_07610	-1.2155	0.0461753	FGSG_13866	FGSG_06480
FGSG_03535	8.50158	9.22e-06	FGSG_12178	-1.26286	0.0421928	FGSG_10993	7.13491	0.00736846	FGSG_05375	-1.7734	0.0425274	FGSG_00071	8.51009	6.95e-07	FGSG_07890	-1.23603	0.0335087	FGSG_03003	FGSG_05443
FGSG_06445	8.20322	7.46e-06	FGSG_00140	-1.3554	0.0474219	FGSG_08325	3.88186	0.0366516	FGSG_07833	-1.87523	0.00884867	FGSG_03535	8.47005	2.99e-06	FGSG_05653	-1.29303	0.0246685	FGSG_03002	FGSG_07136
FGSG_11184	8.13618	4.03e-06	FGSG_01224	-1.40137	0.0189252	FGSG_01235	3.39758	3.75e-06	FGSG_00572	-1.96453	0.0488715	FGSG_11113	8.30396	5.35e-08	FGSG_10772	-1.30675	0.00314298	FGSG_07625	FGSG_10507
FGSG_04741	8.04366	5.02e-06	FGSG_09980	-1.43743	0.00245436	FGSG_10220	3.26248	0.0288636	FGSG_05095	-2.15116	0.0245278	FGSG_09373	8.15753	2.16e-07	FGSG_05177	-1.38582	0.0041403	FGSG_01593	FGSG_12857
FGSG_08946	7.98922	4.96e-06	FGSG_09053	-1.48834	0.0335357	FGSG_04580	3.2098	0.0101891	FGSG_03869	-2.27332	0.047491	FGSG_11097	8.15699	2.16e-07	FGSG_09718	-1.39762	0.0347184	FGSG_02125	FGSG_07303
FGSG_07896	7.94396	1.87e-05	FGSG_07610	-1.51	3.45e-06	FGSG_11883	2.94061	0.0312306	FGSG_11573	-2.64417	0.00206525	FGSG_07896	8.01913	1e-05	FGSG_08875	-1.40222	0.0184936	FGSG_13718	FGSG_06010
FGSG_10411	7.89896	2.44e-06	FGSG_10772	-1.55884	8.14e-08	FGSG_12519	2.91175	0.0101891	FGSG_02358	-2.7638	0.0288636	FGSG_09697	7.91047	0.00048377	FGSG_10260	-1.41605	0.0424414	FGSG_00801	FGSG_05859
FGSG_03365	7.82237	0.000109826	FGSG_02272	-1.59975	0.000118996	FGSG_11113	2.68808	0.000396876	FGSG_05048	-2.83586	0.0106404	FGSG_10543	7.7138	7.85e-06	FGSG_09980	-1.45635	0.00314298	FGSG_00048	FGSG_10264
FGSG_02059	7.59546	5.81e-05	FGSG_10281	-1.61428	0.0401436	FGSG_07458	2.59516	0.00263821	FGSG_06278	-2.94815	2.31e-05	FGSG_03335	7.49551	8.99e-06	FGSG_05023	-1.46661	0.00994531	FGSG_03049	FGSG_02530
FGSG_11049	7.58394	2.57e-05	FGSG_13412	-1.66766	0.0241045	FGSG_01594	2.48452	0.00291661	FGSG_13866	-3.00404	0.00030759	FGSG_10677	7.46142	6.52e-06	FGSG_01224	-1.52395	0.0330122	FGSG_11037	FGSG_13534
FGSG_01768	7.54259	3.56e-05	FGSG_09969	-1.66816	0.0412804	FGSG_10119	2.46618	0.00923046	FGSG_04439	-3.02912	0.0368501	FGSG_02632	7.44527	3.46e-05	FGSG_01326	-1.58623	0.0120458	FGSG_03311	FGSG_02321
FGSG_08687	7.48117	0.000218401	FGSG_03577	-1.69306	0.0373044	FGSG_06127	2.34443	0.0418642	FGSG_02070	-3.06055	0.000991567	FGSG_06445	7.40769	0.000118018	FGSG_05154	-1.61901	0.0363242	FGSG_09598	FGSG_10440
FGSG_11079	7.42449	8.65e-05	FGSG_05154	-1.72342	0.0341337	FGSG_05328	2.20666	0.00684545	FGSG_00793	-3.07785	0.0366516	FGSG_11129	7.40687	8.31e-06	FGSG_08172	-1.62005	0.0457153	FGSG_09424	FGSG_02326
FGSG_03883	7.4236	2.77e-05	FGSG_09524	-1.72821	0.0150319	FGSG_10363	2.14052	0.0480562	FGSG_05906	-3.12409	0.0234061	FGSG_06463	7.37266	0.000114691	FGSG_04194	-1.63679	0.0469155	FGSG_03744	FGSG_09053
FGSG_03585	7.36915	0.000109826	FGSG_04571	-1.74946	0.0421928	FGSG_10200	1.92927	0.0262765	FGSG_09127	-3.13286	0.0101891	FGSG_11397	7.36107	1.2e-05	FGSG_06184	-1.64631	0.00415704	FGSG_02875	FGSG_02692
FGSG_11494	7.35487	0.000176386	FGSG_06493	-1.80081	0.000419816	FGSG_03894	1.62783	0.00736846	FGSG_00067	-3.35328	0.0480562	FGSG_03189	7.34535	3.46e-05	FGSG_12737	-1.64967	0.0171001	FGSG_04872	FGSG_08633
FGSG_11097	7.3435	0.000192203	FGSG_03869	-1.8066	0.0135109	FGSG_14018	1.62075	0.00901482	FGSG_01593	-3.39385	0.0173765	FGSG_11757	7.28918	8e-05	FGSG_06473	-1.67555	0.000177572	FGSG_06833	FGSG_10281
FGSG_11190	7.33434	0.00130164	FGSG_12737	-1.81574	0.0421928				FGSG_05704	-3.58326	0.00736846	FGSG_04741	7.28167	5.83e-05	FGSG_05107	-1.75683	0.0262392	FGSG_05140	FGSG_09969
FGSG_03003	7.30587	0.000575549	FGSG_05859	-1.81852	0.00568176				FGSG_03955	-3.62751	0.0245278	FGSG_01765	7.27766	0.000159827	FGSG_09524	-1.77913	0.0164031	FGSG_04970	FGSG_12178
FGSG_00067	7.30106	9.61e-05	FGSG_01326	-1.8321	0.000803694				FGSG_09126	-3.7069	0.000318661	FGSG_14015	7.27112	2.5e-05	FGSG_06493	-1.78064	0.00327494	FGSG_03349	FGSG_04571
FGSG_02632	7.19352	0.000100793	FGSG_06010	-1.86121	0.00565552				FGSG_00070	-3.9973	0.000501001	FGSG_08687	7.26172	3.46e-05	FGSG_02094	-1.79034	0.00994531	FGSG_02070	FGSG_06741
FGSG_02353	7.16693	0.00023611	FGSG_05011	-1.90199	0.000407383				FGSG_00068	-4.64678	0.0078605	FGSG_03365	7.23242	0.000310851	FGSG_01263	-1.80106	0.0421432	FGSG_11550	FGSG_00619
FGSG_03189	7.15826	0.000145073	FGSG_06184	-1.9392	3.32e-14				FGSG_03731	-5.02544	0.0245278	FGSG_03787	7.19894	2.3e-05	FGSG_05375	-1.80529	0.0335087	FGSG_05502	FGSG_05574
FGSG_00590	7.13604	0.000109826	FGSG_05574	-1.94245	7.26e-07				FGSG_03959	-8.39448	8.2e-05	FGSG_00590	7.18469	3.46e-05	FGSG_03577	-1.80617	0.0141825	FGSG_02866	FGSG_03959
FGSG_03787	7.10784	0.000192203	FGSG_05177	-1.97287	0.000950342							FGSG_01768	7.17815	5.82e-05	FGSG_06333	-1.80899	0.0297489	FGSG_08907	FGSG_03869
FGSG_03543	7.06845	0.000464545	FGSG_12647	-1.98113	0.00372387							FGSG_01596	7.17267	3.46e-05	FGSG_02272	-1.81588	0.000343083	FGSG_09526	FGSG_09126
FGSG_04583	7.03138	0.00160904	FGSG_08633	-1.98259	0.0351644							FGSG_09240	7.13817	0.000246651	FGSG_11617	-1.86503	9.97e-07	FGSG_09159	FGSG_05704
FGSG_14015	6.92735	0.000297047	FGSG_07891	-1.99431	0.00160417							FGSG_11098	7.11212	3.13e-05	FGSG_06752	-1.87604	0.0190713	FGSG_08122	FGSG_09127
FGSG_00801	6.92668	0.00392507	FGSG_05023	-2.03355	0.00116207							FGSG_11399	7.09741	3.6e-05	FGSG_05322	-1.89214	0.0109339	FGSG_00043	FGSG_02358
FGSG_00136	6.87624	0.000396696	FGSG_02641	-2.08611	0.0102412							FGSG_11079	7.09082	3.53e-05	FGSG_12647	-1.9445	0.00436035	FGSG_02343	FGSG_04439
FGSG_01593	6.87425	0.00199533	FGSG_00619	-2.11124	0.0474705							FGSG_11190	7.03429	0.00154185	FGSG_07917	-1.96444	0.0220215	FGSG_04560	FGSG_05375
FGSG_03904	6.86409	0.00224806	FGSG_08172	-2.17172	0.039112							FGSG_10962	6.91836	9.16e-05	FGSG_09881	-1.97529	0.0215834	FGSG_03731	FGSG_06278
FGSG_03537	6.85861	0.000924363	FGSG_07303	-2.19924	0.00373594							FGSG_07289	6.87373	0.00016215	FGSG_05321	-1.97814	0.00217566	FGSG_01833	FGSG_13866
FGSG_03002	6.85167	0.000850613	FGSG_06287	-2.30033	0.0412804							FGSG_01594	6.87211	7.3e-11	FGSG_05066	-1.98081	0.0109339	FGSG_02202	FGSG_00070
FGSG_10677	6.8483	0.000577314	FGSG_06987	-2.3136	0.027696							FGSG_03270	6.86449	0.000158773	FGSG_04296	-1.98438	0.00832214	FGSG_08376	FGSG_02070
FGSG_11550	6.81471	0.0109122	FGSG_02379	-2.32127	0.0272135							FGSG_03883	6.8635	0.00049214	FGSG_13711	-1.99875	0.0477606	FGSG_04431	FGSG_11573
FGSG_11037	6.79463	0.00561548	FGSG_06752	-2.33412	0.00180328							FGSG_03585	6.80498	0.000177572	FGSG_09723	-2.03018	0.00179185	FGSG_07695	FGSG_00068
FGSG_12773	6.73167	0.00160904	FGSG_10983	-2.34944	0.000192203							FGSG_04583	6.79945	0.00017743	FGSG_05011	-2.04741	8.69e-05	FGSG_05839	FGSG_07833
FGSG_02125	6.71843	0.00240573	FGSG_11617	-2.35185	7.38e-07							FGSG_11884	6.74671	0.00247598	FGSG_00971	-2.06277	0.00698329	FGSG_05551	FGSG_05048
FGSG_07500	6.716	0.0016383	FGSG_09749	-2.36663	0.0212096							FGSG_03165	6.72308	8.84e-10	FGSG_13412	-2.10026	0.00995703	FGSG_00007	FGSG_01593
FGSG_03344	6.65868	0.00134183	FGSG_09297	-2.38655	0.039185							FGSG_03543	6.66773	0.0039295	FGSG_08440	-2.10573	0.0054872	FGSG_01818	FGSG_05906
FGSG_00840	6.63895	0.00111206	FGSG_05798	-2.39059	6.51e-05							FGSG_03163	6.65839	0.00375923	FGSG_07495	-2.12123	0.0012831	FGSG_11048	FGSG_03955
FGSG_09240	6.62068	0.00147304	FGSG_02094	-2.39394	1.06e-10							FGSG_08358	6.6546	0.000329083	FGSG_10913	-2.1353	0.00327494	FGSG_05371	FGSG_03731
FGSG_11098	6.59489	0.00160904	FGSG_05321	-2.40138	1.54e-10							FGSG_08738	6.65395	0.000297799	FGSG_02551	-2.13979	0.00042997	FGSG_12705	FGSG_05095
FGSG_00048	6.59128	0.00417589	FGSG_10191	-2.44108	0.0399792							FGSG_11184	6.60672	0.00302256	FGSG_11439	-2.21345	0.0130048	FGSG_11428	FGSG_06658
FGSG_12206	6.57708	0.00215314	FGSG_07136	-2.45299	0.00199533							FGSG_03336	6.59024	0.00121778	FGSG_06287	-2.21643	0.0247034	FGSG_11249	FGSG_09548
FGSG_11397	6.56653	0.00435129	FGSG_05682	-2.47127	0.0458582							FGSG_11494	6.5743	0.00185377	FGSG_02550	-2.26333	0.0109065	FGSG_08435	FGSG_00793
FGSG_02682	6.55504	0.00239615	FGSG_06741	-2.48335	0.0438359							FGSG_04985	6.56086	0.000357621	FGSG_02942	-2.26591	0.0425791	FGSG_03968	FGSG_00067
FGSG_13194	6.5422	0.00349276	FGSG_05277	-2.48554	7.01e-06							FGSG_03741	6.54013	0.000766097	FGSG_09749	-2.26624	0.000945742	FGSG_02063	FGSG_10411
FGSG_03049	6.52781	0.00417589	FGSG_13534	-2.49899	0.0080576							FGSG_05939	6.52091	0.00156426	FGSG_12726	-2.28245	0.0290216	FGSG_10746	FGSG_00572
FGSG_00836	6.50114	0.00394836	FGSG_02321	-2.51496	0.00985278							FGSG_02059	6.49076	0.000750106	FGSG_10191	-2.29915	0.0363242	FGSG_01603	FGSG_12474
FGSG_11399	6.478	0.0490246	FGSG_05107	-2.52572	0.000544892							FGSG_09140	6.48966	0.00152246	FGSG_05798	-2.3177	0.00353775	FGSG_02145	FGSG_05322
FGSG_13718	6.47107	0.00287265	FGSG_04296	-2.54745	0.0117475							FGSG_03175	6.47935	0.000647384	FGSG_07891	-2.35592	0.000166053	FGSG_01095	FGSG_06184
FGSG_03163	6.46252	0.0024069	FGSG_07495	-2.57745	7.17e-05							FGSG_03283	6.47698	0.00214628	FGSG_02641	-2.40397	0.00472629	FGSG_11554	FGSG_06580
FGSG_03054	6.42067	2.94e-10	FGSG_02530	-2.58573	0.00715478							FGSG_05658	6.44599	0.001874	FGSG_06580	-2.40973	0.00226584	FGSG_09610	FGSG_02094
FGSG_11129	6.37238	0.0158189	FGSG_02326	-2.59701	0.0155234							FGSG_07717	6.44519	0.00253874	FGSG_05075	-2.44746	3.46e-05	FGSG_00342	FGSG_05321
FGSG_10962	6.3396	0.00465071	FGSG_02327	-2.63084	0.00143222							FGSG_05357	6.43489	0.00137139	FGSG_04207	-2.50326	3.61e-05	FGSG_11036	FGSG_13562
FGSG_11169	6.3366	0.00824473	FGSG_02550	-2.64959	0.0100536							FGSG_03061	6.40517	0.0021335	FGSG_04988	-2.51906	0.0302142	FGSG_10542	FGSG_03111
FGSG_10901	6.323	0.00751732	FGSG_05322	-2.70912	4.41e-15							FGSG_05847	6.39932	0.000760716	FGSG_11520	-2.55275	0.00987877	FGSG_13638	FGSG_01712
FGSG_11757	6.31672	0.00581996	FGSG_10969	-2.72394	5.93e-05							FGSG_11114	6.39704	0.00112768	FGSG_09127	-2.56941	0.0370596	FGSG_09122	FGSG_06551
FGSG_11428	6.31352	0.027696	FGSG_10913	-2.73903	0.0284857							FGSG_01960	6.37699	0.00259871	FGSG_00725	-2.61486	0.0186511	FGSG_03123	FGSG_00143
FGSG_00043	6.28466	0.0144751	FGSG_02551	-2.76089	9.22e-06							FGSG_09400	6.37646	0.000859534	FGSG_05682	-2.62406	0.000139523	FGSG_04288	FGSG_10772
FGSG_03731	6.27901	0.0193175	FGSG_05443	-2.81888	0.000453649							FGSG_02682	6.3679	0.00139724	FGSG_06985	-2.71673	0.00991144	FGSG_10386	FGSG_01983
FGSG_09598	6.25368	0.00649938	FGSG_02692	-2.82435	0.0335357							FGSG_00836	6.36766	0.00112615	FGSG_06987	-2.73742	0.0109339	FGSG_01177	FGSG_11617
FGSG_06125	6.21955	0.00921231	FGSG_06580	-2.8668	1.4e-13							FGSG_08128	6.36615	0.0012282	FGSG_02327	-2.74301	0.0486814	FGSG_09553	FGSG_07610
FGSG_11554	6.21868	0.0335357	FGSG_09599	-2.87491	2.5e-05							FGSG_03537	6.36409	0.00229473	FGSG_01994	-2.77056	0.000133264	FGSG_04283	FGSG_02264
FGSG_05658	6.20697	0.0078357	FGSG_07917	-2.88274	0.000130954							FGSG_06125	6.33542	0.00206695	FGSG_00140	-2.87741	0.000133264	FGSG_07458	FGSG_05277
FGSG_05294	6.19516	0.027696	FGSG_01994	-2.89148	0.000172425							FGSG_01734	6.30437	0.00263433	FGSG_10006	-2.90917	0.0345399	FGSG_05328	FGSG_02551
FGSG_05791	6.18675	0.0237229	FGSG_08375	-2.91869	0.00987406							FGSG_00510	6.3015	0.00171997	FGSG_05277	-2.9473	4.73e-06	FGSG_03894	FGSG_09599
FGSG_09374	6.18129	0.0133904	FGSG_06480	-2.93555	0.000193104							FGSG_08596	6.30065	0.00156426	FGSG_05904	-2.9652	0.0335087	FGSG_10993	FGSG_12492
FGSG_04970	6.17338	0.0100536	FGSG_05075	-2.95145	0.000111508							FGSG_02353	6.29124	0.00442767	FGSG_01478	-2.98602	0.0466682	FGSG_14018	FGSG_10969
FGSG_06833	6.16824	0.00982147	FGSG_02264	-3.01648	4.85e-06							FGSG_05294	6.28994	0.00476889	FGSG_01557	-3.01254	0.0356703	FGSG_10119	FGSG_05798
FGSG_11048	6.15889	0.0272227	FGSG_06688	-3.08394	3.03e-06							FGSG_02038	6.28664	0.0094174	FGSG_03679	-3.02167	0.00991144	FGSG_12519	FGSG_07495
FGSG_02316	6.15872	0.0133904	FGSG_03111	-3.11306	1.01e-09							FGSG_11275	6.2698	0.00145832	FGSG_02358	-3.03888	0.00442767	FGSG_10220	FGSG_01674
FGSG_02735	6.13338	0.0127235	FGSG_10752	-3.23692	0.000685339							FGSG_02869	6.25189	0.0017133	FGSG_07485	-3.10322	0.000479391	FGSG_11883	FGSG_05075
FGSG_05357	6.12953	0.0135109	FGSG_10507	-3.30214	0.00236854							FGSG_10022	6.24998	1.31e-16	FGSG_07584	-3.11869	0.0143796	FGSG_08325	FGSG_02272
FGSG_08738	6.12655	0.0121466	FGSG_03959	-3.38713	1.84e-05							FGSG_10411	6.23821	0.0017133	FGSG_03432	-3.15576	0.0363242	FGSG_10363	FGSG_07917
FGSG_01603	6.10296	0.0305347	FGSG_00143	-3.57688	3.39e-09							FGSG_11169	6.22841	0.00228736	FGSG_02880	-3.2037	0.00767176	FGSG_01235	FGSG_01994
FGSG_09159	6.10014	0.012812	FGSG_11439	-3.77	0.0223267							FGSG_12110	6.21383	0.0100229	FGSG_10983	-3.21679	0.00027106	FGSG_03175	FGSG_10983
FGSG_00007	6.09846	0.0238718	FGSG_01712	-4.04193	1.97e-09							FGSG_05223	6.188	0.0021335	FGSG_09126	-3.24588	0.00596224	FGSG_02869	FGSG_01673
FGSG_01407	6.08981	0.0134576	FGSG_06551	-4.06994	2.2e-09							FGSG_07793	6.17768	0.00247598	FGSG_02264	-3.31242	4.63e-09	FGSG_01960	FGSG_05011
FGSG_04985	6.07464	0.0114638	FGSG_12474	-4.42164	4.41e-15							FGSG_09775	6.16548	0.00375923	FGSG_05574	-3.32524	2.42e-15	FGSG_11113	FGSG_06493
FGSG_09400	6.05463	0.0185432	FGSG_01983	-4.51804	2.39e-07							FGSG_03247	6.1605	0.00661763	FGSG_10969	-3.35387	0.0211109	FGSG_03635	FGSG_05107
FGSG_05839	6.05076	0.0237467	FGSG_12492	-4.547	4.32e-05							FGSG_09141	6.15492	0.00380531	FGSG_03111	-3.36223	8.97e-08	FGSG_04580	FGSG_10752
FGSG_09775	6.04842	0.0146469	FGSG_13562	-4.90358	1.54e-10							FGSG_08077	6.15021	0.00274052	FGSG_13562	-3.39414	1.71e-05	FGSG_10200	FGSG_07061
FGSG_08358	6.03307	0.0238718	FGSG_06676	-5.3116	0.0412804							FGSG_10776	6.14417	1.67e-17	FGSG_07889	-3.40446	0.0346371	FGSG_01594	FGSG_01326
FGSG_08376	6.01156	0.0207496	FGSG_00076	-5.34938	0.00116787							FGSG_09374	6.14105	0.0036852	FGSG_09293	-3.42658	0.0125794	FGSG_06127	FGSG_05177
FGSG_01833	5.9887	0.0199001	FGSG_10440	-5.85057	0.0137546							FGSG_02966	6.12751	0.00614996	FGSG_10752	-3.44406	0.00325149	FGSG_00979	FGSG_05023
FGSG_07695	5.97815	0.0227129	FGSG_00002	-7.30105	0.0084884							FGSG_10661	6.12205	0.0124018	FGSG_01983	-3.52404	1.77e-08	FGSG_10022	FGSG_00076
FGSG_12705	5.97592	0.027444	FGSG_07061	-7.96329	0.000685739							FGSG_11049	6.11778	0.0120458	FGSG_04135	-3.52413	0.0147891	FGSG_12483	FGSG_02327
FGSG_12887	5.94334	0.0188678	FGSG_01673	-8.11065	0.000269303							FGSG_03015	6.08573	0.00444865	FGSG_06514	-3.53667	0.0361349	FGSG_03054	FGSG_07891
FGSG_02145	5.92679	0.0306596	FGSG_01674	-8.66079	0.000109826							FGSG_09052	6.0845	0.0139993	FGSG_09599	-3.55241	1.51e-16	FGSG_03518	FGSG_06752
FGSG_13638	5.92662	0.0373044	FGSG_03063	-9.53243	3.04e-08							FGSG_04946	6.07549	0.00561984	FGSG_03442	-3.57303	0.037468	FGSG_07543	FGSG_09980
FGSG_04283	5.9017	0.0499409										FGSG_12534	6.0706	0.00665124	FGSG_06725	-3.74891	0.00444865	FGSG_06463	FGSG_12647
FGSG_01765	5.88208	0.0261692										FGSG_12773	6.05539	0.00330764	FGSG_04439	-3.77533	0.000114691	FGSG_09896	FGSG_00002
FGSG_10369	5.84748	0.0284857										FGSG_05791	6.0503	0.00434971	FGSG_01712	-3.79364	2.65e-08	FGSG_10855	FGSG_08375
FGSG_06047	5.84014	0.0401436										FGSG_11395	6.03961	0.00327494	FGSG_07522	-3.83155	0.000142103	FGSG_00071	FGSG_02550
FGSG_11396	5.82939	0.0345659										FGSG_12887	6.0365	0.00678112	FGSG_03142	-3.91099	0.0150021	FGSG_01580	FGSG_02641
FGSG_02596	5.82674	0.0306596										FGSG_09070	6.01877	0.00449978	FGSG_03869	-4.04598	2.04e-07	FGSG_11205	FGSG_05784
FGSG_13385	5.82521	0.0284857										FGSG_08461	5.98945	0.00779737	FGSG_08375	-4.3027	0.000142001	FGSG_03272	FGSG_04296
FGSG_02063	5.81995	0.0286335										FGSG_10369	5.98737	0.00535206	FGSG_05704	-4.46673	0.000152065	FGSG_10411	FGSG_09524
FGSG_00342	5.76846	0.0346952										FGSG_02316	5.98666	0.00905239	FGSG_01764	-4.52622	0.000418075	FGSG_11184	FGSG_01224
FGSG_09122	5.76726	0.0396006										FGSG_01744	5.98389	0.00476183	FGSG_12474	-4.5429	1.67e-23	FGSG_08946	FGSG_09749
FGSG_09553	5.74647	0.0482875										FGSG_10901	5.9806	0.00442767	FGSG_00143	-4.56289	0.000165651	FGSG_04741	FGSG_11439
FGSG_01580	5.73197	5.16e-07										FGSG_06503	5.9775	0.00417391	FGSG_07061	-4.60585	0.00665124	FGSG_01523	FGSG_13412
FGSG_07289	5.67804	0.048177										FGSG_04317	5.97226	0.00611459	FGSG_06551	-4.63169	1.15e-17	FGSG_11398	FGSG_02379
FGSG_04288	5.67044	0.0431118										FGSG_12851	5.96316	0.00987877	FGSG_02883	-4.75538	0.00167041	FGSG_06445	FGSG_06987
FGSG_04946	5.66951	0.0451215										FGSG_11099	5.9255	0.0070087	FGSG_03230	-5.03212	0.000503083	FGSG_03535	FGSG_10913
FGSG_09896	5.65077	2.18e-07										FGSG_02920	5.92168	0.024707	FGSG_12492	-5.08434	0.00994531	FGSG_08359	FGSG_05154
FGSG_03272	5.6184	1e-06										FGSG_06521	5.9154	0.00596224	FGSG_09297	-5.25192	8.5e-05	FGSG_07896	FGSG_03577
FGSG_04456	5.40086	0.000329099										FGSG_02735	5.91306	0.0109644	FGSG_02379	-5.42574	1.1e-06	FGSG_11049	FGSG_08172
FGSG_10022	5.23468	1.4e-10										FGSG_13385	5.89493	0.0109065	FGSG_04879	-5.58717	3.64e-08	FGSG_03883	FGSG_09297
FGSG_07988	5.10215	0.000231674										FGSG_03344	5.89465	0.00665124	FGSG_00076	-6.34966	1.16e-05	FGSG_01026	FGSG_10191
FGSG_08684	5.02192	0.00018632										FGSG_02847	5.89433	0.00947128	FGSG_06676	-7.60255	1.68e-10	FGSG_01768	FGSG_06676
FGSG_03343	5.00087	5.16e-05										FGSG_03292	5.89019	0.00942925	FGSG_00002	-8.50031	7.34e-12	FGSG_03343	FGSG_06287
FGSG_03518	4.96462	1.01e-09										FGSG_04580	5.87825	2.16e-07	FGSG_08456	-8.57805	0.000200194	FGSG_02059	FGSG_12737
FGSG_13737	4.698	0.000366509										FGSG_04998	5.87111	0.00946689	FGSG_01673	-8.74928	1.2e-05	FGSG_00655	FGSG_05682
FGSG_13866	4.48018	0.000575549										FGSG_04975	5.86895	0.0152402	FGSG_01674	-9.28681	1.13e-05	FGSG_11079	FGSG_00140
FGSG_02875	4.45381	0.00928575										FGSG_10397	5.8555	0.0251447	FGSG_03959	-11.7208	5.98e-16	FGSG_02632	FGSG_04879
FGSG_01594	4.3626	0.00884322										FGSG_11396	5.85015	0.0119963				FGSG_00590	FGSG_04207
FGSG_12862	4.33921	0.0123743										FGSG_02753	5.84872	0.00665124				FGSG_03585	FGSG_07522
FGSG_06278	4.32756	1.01e-05										FGSG_12607	5.8333	0.0165306				FGSG_03365	FGSG_06473
FGSG_10542	4.18965	0.0365847										FGSG_11228	5.83283	0.0157612				FGSG_02077	FGSG_08456
FGSG_01095	4.14645	0.0335357										FGSG_13194	5.83015	0.00994531				FGSG_10212	FGSG_01764
FGSG_10224	4.11306	0.00982147										FGSG_08232	5.80931	0.0318224				FGSG_03189	FGSG_07485
FGSG_11036	4.02307	0.0350145										FGSG_09821	5.8089	0.0276231				FGSG_11494	FGSG_03230
FGSG_03715	3.99566	0.00112396										FGSG_07366	5.77922	0.0136653				FGSG_08684	FGSG_02883
FGSG_09610	3.90319	0.0335357										FGSG_03054	5.76999	2.99e-06				FGSG_11097	FGSG_09723
FGSG_03745	3.83628	0.00108631										FGSG_05190	5.76297	0.0120458				FGSG_03787	FGSG_06725
FGSG_11398	3.79906	5.44e-06										FGSG_01407	5.75847	0.00944436				FGSG_08687	FGSG_08440
FGSG_10386	3.79433	0.0474705										FGSG_07263	5.75682	0.0157612				FGSG_07988	FGSG_00971
FGSG_02516	3.75085	0.0335357										FGSG_02596	5.73461	0.00995703				FGSG_02353	FGSG_02880
FGSG_12704	3.66332	0.00417589										FGSG_11183	5.73395	0.0356068				FGSG_14015	FGSG_11520
FGSG_08407	3.64271	0.0388806										FGSG_01757	5.73162	0.0216709				FGSG_04456	FGSG_06985
FGSG_05720	3.53817	1.84e-05										FGSG_03184	5.73037	0.0150021				FGSG_13737	FGSG_03679
FGSG_11300	3.50677	0.00206202										FGSG_12742	5.72377	0.0109339				FGSG_00136	FGSG_05066
FGSG_08309	3.40591	0.0223267										FGSG_07500	5.72233	0.0112985				FGSG_11303	FGSG_09293
FGSG_00330	3.38683	0.0045299										FGSG_02467	5.72179	3.6e-05				FGSG_03543	FGSG_07584
FGSG_06059	3.3789	0.0109603										FGSG_03635	5.72141	0.0164031				FGSG_11298	FGSG_04135
FGSG_08359	3.37384	1.33e-05										FGSG_11656	5.72139	0.0486629				FGSG_10677	FGSG_03142
FGSG_01818	3.36741	0.0266542										FGSG_03011	5.68762	0.0119025				FGSG_06647	FGSG_08875
FGSG_09424	3.33514	0.00649938										FGSG_03355	5.6823	0.0143796				FGSG_03662	FGSG_00725
FGSG_10855	3.28829	2.39e-07										FGSG_03430	5.68089	0.0164031				FGSG_07542	FGSG_09881
FGSG_13954	3.21364	0.00333756										FGSG_11145	5.67772	0.0123331				FGSG_03537	FGSG_05653
FGSG_09362	3.20577	0.0474705										FGSG_03904	5.67327	0.0150021				FGSG_08700	FGSG_12726
FGSG_11249	3.18245	0.0284857										FGSG_10990	5.65803	0.0164943				FGSG_03745	FGSG_03312
FGSG_07625	3.1727	0.00129677										FGSG_00321	5.65156	0.0335087				FGSG_00840	FGSG_06333
FGSG_11205	3.15131	7.38e-07										FGSG_10073	5.65024	0.0147809				FGSG_03715	FGSG_04988
FGSG_12483	3.14318	2.35e-10										FGSG_04477	5.64879	0.0208409				FGSG_11190	FGSG_00529
FGSG_11164	3.13861	0.00866234										FGSG_06046	5.63437	0.037468				FGSG_03344	FGSG_07890
FGSG_05502	3.08621	0.010941										FGSG_00840	5.63176	0.0176138				FGSG_09240	FGSG_05904
FGSG_03744	2.98177	0.00721402										FGSG_00168	5.62202	0.0140581				FGSG_04583	FGSG_10006
FGSG_05551	2.94521	0.0238127										FGSG_03245	5.61474	0.0164031				FGSG_11098	FGSG_07889
FGSG_06647	2.9286	0.000577314										FGSG_03915	5.60898	0.00576936				FGSG_12773	FGSG_09718
FGSG_11298	2.92395	0.000575549										FGSG_11127	5.60577	0.0171001				FGSG_07500	FGSG_01557
FGSG_00979	2.91168	4.41e-15										FGSG_05234	5.60287	0.0164031				FGSG_07863	FGSG_06514
FGSG_00655	2.76631	7.49e-05										FGSG_03281	5.60173	0.0159123				FGSG_11300	FGSG_03432
FGSG_04560	2.64532	0.0191976										FGSG_12206	5.60095	0.0410217				FGSG_12206	FGSG_03442
FGSG_11303	2.64138	0.000455338										FGSG_11658	5.59002	0.0265108				FGSG_03904	FGSG_01263
FGSG_04872	2.61514	0.00949601										FGSG_04596	5.56893	0.017418				FGSG_01882	FGSG_10260
FGSG_07542	2.59519	0.000732472										FGSG_04916	5.56551	0.037468				FGSG_02682	FGSG_02942
FGSG_01523	2.57966	5.37e-06										FGSG_01580	5.54179	8.69e-05				FGSG_04735	FGSG_01478
FGSG_08700	2.54723	0.00102687										FGSG_06047	5.52541	0.0315033				FGSG_03163	FGSG_04194
FGSG_03662	2.53273	0.000727593										FGSG_01172	5.49735	0.0210627				FGSG_03529	FGSG_13711
FGSG_05140	2.41493	0.00985633										FGSG_03150	5.48594	0.0319636				FGSG_13954
FGSG_02202	2.40153	0.0206415										FGSG_08350	5.48392	1.22e-06				FGSG_13194
FGSG_02343	2.38514	0.0186347										FGSG_04456	5.47608	5.19e-05				FGSG_00836
FGSG_03123	2.37057	0.0412804										FGSG_05937	5.46255	0.0249836				FGSG_08266
FGSG_06127	2.37029	0.0177282										FGSG_05247	5.45717	0.0237091				FGSG_12704
FGSG_08266	2.32668	0.00405698										FGSG_07491	5.43365	0.0307965				FGSG_11397
FGSG_03968	2.31446	0.0284857										FGSG_00136	5.42373	0.0393684				FGSG_00330
FGSG_10212	2.30821	0.000125751										FGSG_03272	5.39701	1.67e-05				FGSG_10962
FGSG_09552	2.30132	0.00649938										FGSG_01108	5.32765	0.0400946				FGSG_11757
FGSG_05371	2.29525	0.0272529										FGSG_10606	5.27854	0.0408977				FGSG_09552
FGSG_01084	2.20434	0.0133904										FGSG_10224	4.96744	3.26e-08				FGSG_11472
FGSG_01026	2.18658	2.98e-05										FGSG_07925	4.92956	9.24e-05				FGSG_10901
FGSG_02070	2.13901	0.010586										FGSG_10145	4.80391	0.000151279				FGSG_05658
FGSG_13392	2.12492	0.00824473										FGSG_13737	4.79426	0.00048377				FGSG_11169
FGSG_04431	2.12448	0.0216592										FGSG_06127	4.77569	6.72e-18				FGSG_13392
FGSG_03529	2.11063	0.00298332										FGSG_08407	4.69014	0.000124672				FGSG_13000
FGSG_05444	2.05278	0.0334975										FGSG_02691	4.67019	0.0164031				FGSG_11164
FGSG_04735	1.96601	0.0024069										FGSG_07488	4.60414	0.0334982				FGSG_06125
FGSG_09526	1.95754	0.0121547										FGSG_09081	4.60163	0.00105588				FGSG_10224
FGSG_03311	1.90127	0.00596449										FGSG_04333	4.45536	0.0021335				FGSG_06059
FGSG_10746	1.90009	0.0289817										FGSG_06328	4.43854	3.92e-06				FGSG_04985
FGSG_02866	1.87875	0.0109603										FGSG_03343	4.35835	0.0128159				FGSG_10543
FGSG_01882	1.83914	0.00226826										FGSG_12862	4.25156	0.0116365				FGSG_08738
FGSG_08435	1.82588	0.0284857										FGSG_11205	4.22491	8.45e-19				FGSG_12862
FGSG_08122	1.78679	0.0139372										FGSG_07988	4.19722	0.0107531				FGSG_02735
FGSG_06784	1.78383	0.0405709										FGSG_09896	4.09896	0.0120518				FGSG_02316
FGSG_11472	1.70504	0.00681327										FGSG_08684	4.03828	0.0123532				FGSG_09374
FGSG_01177	1.67174	0.0475936										FGSG_02516	4.02615	0.00267105				FGSG_01084
FGSG_08907	1.62807	0.0113659										FGSG_02578	4.00906	0.000568067				FGSG_01407
FGSG_04824	1.60947	0.0223267										FGSG_09272	4.00825	0.0225022				FGSG_05357
FGSG_03349	1.54741	0.0101579										FGSG_03518	3.99272	2.33e-05				FGSG_04876
FGSG_13000	1.51004	0.0084884										FGSG_09082	3.95953	0.00916279				FGSG_09775
FGSG_02077	1.45602	0.000109826										FGSG_02342	3.90291	0.0184936				FGSG_11129
FGSG_07863	1.33565	0.0016468										FGSG_11398	3.8982	3.46e-05				FGSG_09400
FGSG_04876	1.24692	0.0136747										FGSG_04527	3.87741	0.0253699				FGSG_12887
												FGSG_06681	3.87628	0.000133264				FGSG_04824
												FGSG_03715	3.8753	7.11e-05				FGSG_08309
												FGSG_10855	3.80553	1.15e-17				FGSG_05791
												FGSG_03745	3.78012	0.000418075				FGSG_08358
												FGSG_00377	3.77605	0.0135296				FGSG_01765
												FGSG_03416	3.77441	0.000188362				FGSG_05294
												FGSG_12704	3.73564	0.000494833				FGSG_10369
												FGSG_08359	3.69792	2.3e-05				FGSG_13385
												FGSG_06669	3.68175	0.0459055				FGSG_02596
												FGSG_09362	3.62897	0.00058345				FGSG_05444
												FGSG_07261	3.61752	0.0471788				FGSG_02516
												FGSG_00330	3.59793	0.000750106				FGSG_11396
												FGSG_06059	3.53788	0.00291348				FGSG_08407
												FGSG_03462	3.52342	0.0021335				FGSG_06047
												FGSG_00769	3.52043	0.0408977				FGSG_06784
												FGSG_11926	3.43892	0.0106858				FGSG_04946
												FGSG_02515	3.33305	0.0302142				FGSG_09362
												FGSG_07542	3.31109	1.2e-05				FGSG_07289
												FGSG_03347	3.27712	0.00294675				FGSG_11399
												FGSG_09834	3.24028	5.21e-07				FGSG_10776
												FGSG_00979	3.21093	4.81e-14				FGSG_03165
												FGSG_03269	3.19656	0.0199337				FGSG_03190
												FGSG_08309	3.18648	0.0193749				FGSG_09373
												FGSG_00655	3.11821	0.000136997				FGSG_09834
												FGSG_08760	3.10057	0.013407				FGSG_08350
												FGSG_02814	3.08274	0.00679912				FGSG_03422
												FGSG_02075	3.05653	0.0169872				FGSG_06328
												FGSG_01523	3.04334	4.53e-05				FGSG_03466
												FGSG_01782	2.91715	0.0390075				FGSG_03335
												FGSG_03340	2.88503	0.024707				FGSG_01596
												FGSG_07130	2.8504	0.0101205				FGSG_02467
												FGSG_10200	2.83286	3.26e-08				FGSG_05797
												FGSG_12483	2.82591	9.51e-06				FGSG_07925
												FGSG_11300	2.75913	0.0354519				FGSG_06681
												FGSG_01832	2.75848	0.017185				FGSG_10145
												FGSG_11164	2.74295	7.37e-05				FGSG_03270
												FGSG_05797	2.73262	8.69e-05				FGSG_03416
												FGSG_02204	2.70873	0.00364758				FGSG_09697
												FGSG_02978	2.66104	0.00916279				FGSG_09739
												FGSG_10739	2.62788	0.0260744				FGSG_10267
												FGSG_08266	2.61486	0.000152065				FGSG_02578
												FGSG_01235	2.54926	0.0486393				FGSG_05847
												FGSG_09552	2.52005	0.00516061				FGSG_03741
												FGSG_03529	2.4544	3.95e-05				FGSG_03414
												FGSG_04922	2.43828	0.0116365				FGSG_09081
												FGSG_03414	2.42551	0.00104101				FGSG_11114
												FGSG_08459	2.41511	0.00417391				FGSG_03336
												FGSG_13954	2.32538	0.027615				FGSG_08128
												FGSG_06647	2.28134	0.0157612				FGSG_11275
												FGSG_01026	2.26284	3.46e-05				FGSG_04736
												FGSG_02087	2.23883	0.0390075				FGSG_09140
												FGSG_10212	2.19678	0.000142001				FGSG_08596
												FGSG_06784	2.16149	0.00048377				FGSG_05939
												FGSG_01572	2.15844	0.0290438				FGSG_00510
												FGSG_05444	2.14027	0.0386292				FGSG_03061
												FGSG_04876	2.13404	0.00015522				FGSG_04333
												FGSG_00609	2.11675	0.00665124				FGSG_05223
												FGSG_02657	2.10647	0.0382437				FGSG_03462
												FGSG_03662	2.10541	0.0275887				FGSG_03283
												FGSG_11298	2.0907	0.0110654				FGSG_07793
												FGSG_06307	2.07914	0.031594				FGSG_11884
												FGSG_08700	2.06362	0.0119963				FGSG_07717
												FGSG_01084	2.05989	0.0144923				FGSG_01734
												FGSG_02100	2.03927	0.0333904				FGSG_08077
												FGSG_00489	2.01235	0.0291728				FGSG_03347
												FGSG_08238	1.99943	0.0111625				FGSG_11395
												FGSG_04736	1.96181	0.00150144				FGSG_02204
												FGSG_00649	1.89813	0.0233869				FGSG_09141
												FGSG_03466	1.88624	4.15e-06				FGSG_08459
												FGSG_03072	1.87511	0.00916279				FGSG_06503
												FGSG_13392	1.85567	0.0365973				FGSG_03015
												FGSG_04824	1.84	0.00587597				FGSG_09070
												FGSG_09204	1.82842	0.0302142				FGSG_10347
												FGSG_10267	1.80941	0.00049214				FGSG_01744
												FGSG_11472	1.78591	0.0109339				FGSG_03915
												FGSG_09739	1.78214	0.000487141				FGSG_06521
												FGSG_02077	1.61021	0.000654622				FGSG_04317
												FGSG_11303	1.59472	0.0342602				FGSG_02966
												FGSG_08351	1.57169	0.0394217				FGSG_03247
												FGSG_04735	1.50343	0.0309				FGSG_12534
												FGSG_03475	1.49068	0.0175569				FGSG_02753
												FGSG_01882	1.48105	0.00121133				FGSG_00609
												FGSG_07863	1.45447	0.00325149				FGSG_02814
												FGSG_12138	1.41392	0.0319293				FGSG_11099
												FGSG_13000	1.23899	0.0246685				FGSG_08461
												FGSG_10347	1.2076	0.0045501				FGSG_09082
												FGSG_02461	1.07884	0.0220696				FGSG_03072
												FGSG_02783	1.07643	0.0477056				FGSG_02978
																		FGSG_02038
																		FGSG_03292
																		FGSG_04998
																		FGSG_02847
																		FGSG_12851
																		FGSG_12110
																		FGSG_07130
																		FGSG_11926
																		FGSG_12742
																		FGSG_08238
																		FGSG_04922
																		FGSG_03011
																		FGSG_05190
																		FGSG_11145
																		FGSG_10661
																		FGSG_08760
																		FGSG_00377
																		FGSG_07366
																		FGSG_09052
																		FGSG_00168
																		FGSG_03355
																		FGSG_10073
																		FGSG_03184
																		FGSG_04975
																		FGSG_11228
																		FGSG_07263
																		FGSG_03281
																		FGSG_03245
																		FGSG_02691
																		FGSG_03430
																		FGSG_05234
																		FGSG_10990
																		FGSG_12607
																		FGSG_02075
																		FGSG_11127
																		FGSG_01832
																		FGSG_04596
																		FGSG_03475
																		FGSG_02342
																		FGSG_03269
																		FGSG_04477
																		FGSG_01172
																		FGSG_01757
																		FGSG_02461
																		FGSG_09272
																		FGSG_00649
																		FGSG_05247
																		FGSG_03340
																		FGSG_02920
																		FGSG_05937
																		FGSG_10397
																		FGSG_04527
																		FGSG_10739
																		FGSG_11658
																		FGSG_09821
																		FGSG_01572
																		FGSG_00489
																		FGSG_02515
																		FGSG_09204
																		FGSG_07491
																		FGSG_06307
																		FGSG_08232
																		FGSG_12138
																		FGSG_03150
																		FGSG_02100
																		FGSG_07488
																		FGSG_00321
																		FGSG_11183
																		FGSG_04916
																		FGSG_06046
																		FGSG_02657
																		FGSG_02087
																		FGSG_01782
																		FGSG_08351
																		FGSG_01108
																		FGSG_10606
																		FGSG_00769
																		FGSG_06669
																		FGSG_07261
																		FGSG_02783
																		FGSG_11656

## Sheet: DEGs(SU)
Upregulated and Downregulated DEGs in three comparisons and in total in Sumai3
24HAI VS 12HAI						36HAI VS 24HAI						36HAI VS 12HAI						Total
Upregulated(n=97)			Downregulated(n=103)			Upregulated(n=227)			Downregulated(n=64)			Upregulated(n=558)			Downregulated(n=329)			Upregulated (n=683)	Downregulatd (n=396)
gene_ID	log2FoldChange	padj	gene_ID	log2FoldChange	padj	gene_ID	log2FoldChange	padj	gene_ID	log2FoldChange	padj	gene_ID	log2FoldChange	padj	gene_ID	log2FoldChange	padj
FGSG_06463	7.99722	2.54e-06	FGSG_06895	-1.15297	0.0294266	FGSG_03543	10.1898	3.8e-13	FGSG_10772	-1.0131	0.0156124	FGSG_03535	10.9631	9.46e-17	FGSG_01561	-1.01502	0.0122986	FGSG_20080	FGSG_09906
FGSG_06445	7.80777	7.1e-06	FGSG_10264	-1.154	0.00714791	FGSG_03537	9.48302	2.89e-10	FGSG_05310	-1.02169	0.0347304	FGSG_00071	10.8366	1.88e-16	FGSG_10800	-1.01735	0.00291197	FGSG_09638	FGSG_08359
FGSG_00571	7.62148	0.000109961	FGSG_08768	-1.17235	0.0163981	FGSG_00007	9.21563	2.7e-10	FGSG_05932	-1.09438	0.0474645	FGSG_07896	10.4483	3.26e-15	FGSG_08669	-1.02192	0.0173169	FGSG_01553	FGSG_11440
FGSG_03424	7.12979	0.000854564	FGSG_09341	-1.17508	0.0362657	FGSG_03190	8.60837	0.0147204	FGSG_05554	-1.10331	0.0402831	FGSG_00571	9.83263	2.48e-05	FGSG_07251	-1.02614	0.0225286	FGSG_07262	FGSG_02794
FGSG_11184	7.07019	0.00160606	FGSG_10019	-1.20675	0.00849331	FGSG_07896	8.53686	2.76e-21	FGSG_04117	-1.1215	0.0111151	FGSG_10397	9.46184	9.67e-12	FGSG_09547	-1.04695	0.0380544	FGSG_02233	FGSG_07477
FGSG_04077	6.93841	0.00141698	FGSG_06184	-1.22088	0.0296375	FGSG_01770	8.45628	1.73e-06	FGSG_04134	-1.1245	0.00948205	FGSG_03424	9.39314	1.19e-10	FGSG_01993	-1.04811	0.00885809	FGSG_06246	FGSG_02929
FGSG_20080	5.10336	3.64e-20	FGSG_09980	-1.25043	0.0234364	FGSG_00539	8.34627	3.81e-06	FGSG_06424	-1.15976	0.0486002	FGSG_03543	9.34113	9.67e-12	FGSG_05375	-1.06134	0.0202907	FGSG_08644	FGSG_10264
FGSG_08253	4.90715	0.00375329	FGSG_03460	-1.33581	0.0155896	FGSG_03599	8.27916	0.000109559	FGSG_04350	-1.16772	0.0386484	FGSG_03467	9.30893	8.8e-11	FGSG_10007	-1.07673	0.0293039	FGSG_07379	FGSG_07302
FGSG_03347	4.83116	0.00683398	FGSG_00500	-1.35135	0.0394182	FGSG_07562	8.26312	3.75e-07	FGSG_06154	-1.19005	0.0267766	FGSG_01818	8.91837	2.07e-09	FGSG_13056	-1.07726	0.0371525	FGSG_08749	FGSG_09552
FGSG_20079	4.78654	8.81e-30	FGSG_10200	-1.36265	0.0268454	FGSG_01771	8.2546	2.65e-06	FGSG_05387	-1.19128	0.0391124	FGSG_11097	8.91792	1.62e-10	FGSG_05750	-1.08589	0.0157439	FGSG_05422	FGSG_10019
FGSG_20084	4.49751	4.36e-27	FGSG_02751	-1.40702	0.0290253	FGSG_00071	8.2294	9.49e-29	FGSG_06246	-1.22811	0.0057681	FGSG_11303	8.91435	1.35e-09	FGSG_10522	-1.09221	0.00297438	FGSG_06165	FGSG_00059
FGSG_20058	4.4461	1.82e-29	FGSG_09552	-1.41935	0.00797881	FGSG_05042	8.17694	2.82e-07	FGSG_05374	-1.23889	0.00650688	FGSG_06463	8.88246	1.51e-09	FGSG_05130	-1.10751	0.0435356	FGSG_01059	FGSG_06692
FGSG_05336	4.41077	0.021336	FGSG_13931	-1.54668	0.0310068	FGSG_05847	8.16861	1.54e-05	FGSG_06089	-1.24366	0.0428513	FGSG_06445	8.7334	1.14e-08	FGSG_09887	-1.10918	0.00629365	FGSG_00695	FGSG_08768
FGSG_20083	4.40182	5.38e-26	FGSG_04826	-1.56898	0.0299108	FGSG_03535	8.0919	1.37e-28	FGSG_08474	-1.30803	0.0218956	FGSG_03598	8.72986	2.3e-07	FGSG_05554	-1.12296	0.000889568	FGSG_00921	FGSG_00048
FGSG_20056	4.39974	2.29e-28	FGSG_05130	-1.59367	0.0176617	FGSG_03539	8.04835	2.82e-07	FGSG_09887	-1.36157	0.00651798	FGSG_08946	8.68953	5.06e-10	FGSG_06108	-1.13767	0.0111305	FGSG_00257	FGSG_08013
FGSG_03700	4.37638	0.0221516	FGSG_04399	-1.61487	0.0423813	FGSG_10397	7.81446	6.93e-15	FGSG_06526	-1.3689	0.0244128	FGSG_03537	8.63356	3.71e-09	FGSG_01916	-1.14573	0.0244484	FGSG_01217	FGSG_05738
FGSG_20052	4.36607	1.65e-22	FGSG_01561	-1.61771	0.0301433	FGSG_01661	7.74038	8.43e-05	FGSG_06583	-1.39153	0.0116983	FGSG_11304	8.63005	9.06e-07	FGSG_01555	-1.17982	7.26e-05	FGSG_06154	FGSG_12296
FGSG_07379	4.30654	0.00659031	FGSG_02402	-1.67297	0.0299108	FGSG_10990	7.68434	1.98e-06	FGSG_03349	-1.39365	0.01079	FGSG_03628	8.61398	3.93e-07	FGSG_09625	-1.2159	0.0182575	FGSG_10304	FGSG_10177
FGSG_20047	4.29695	2.83e-21	FGSG_05011	-1.67523	0.00455763	FGSG_01596	7.57036	6.29e-06	FGSG_10003	-1.41519	0.0125043	FGSG_09367	8.46738	5.63e-08	FGSG_01193	-1.22952	0.0351625	FGSG_04392	FGSG_07685
FGSG_20054	4.29411	1.26e-26	FGSG_06692	-1.68882	0.0161189	FGSG_10542	7.55827	2.75e-05	FGSG_13033	-1.43914	0.0252479	FGSG_03189	8.433	1.09e-08	FGSG_03017	-1.231	0.00144842	FGSG_03072	FGSG_10200
FGSG_20050	4.26867	1.24e-18	FGSG_02427	-1.7402	0.0079352	FGSG_12119	7.5238	0.000184568	FGSG_01588	-1.45214	0.0109076	FGSG_10543	8.35817	9.65e-07	FGSG_11797	-1.23287	0.0397669	FGSG_04181	FGSG_06895
FGSG_20049	4.22661	3.64e-25	FGSG_08359	-1.80549	0.000478944	FGSG_01765	7.50599	7.01e-06	FGSG_02233	-1.45817	0.0380719	FGSG_11184	8.31899	2.53e-08	FGSG_10296	-1.23377	0.0195243	FGSG_02658	FGSG_06184
FGSG_20074	4.21138	1.69e-24	FGSG_11617	-1.81041	0.000731399	FGSG_00006	7.4503	4.16e-05	FGSG_06054	-1.47983	0.0277237	FGSG_08012	8.31735	1.08e-08	FGSG_06359	-1.24484	0.00146432	FGSG_05336	FGSG_04826
FGSG_11398	4.10985	0.00864854	FGSG_08942	-1.83822	0.0107829	FGSG_03184	7.41136	5.62e-06	FGSG_04302	-1.50796	0.0314126	FGSG_10677	8.28895	1.38e-08	FGSG_09832	-1.25322	0.00489871	FGSG_01870	FGSG_11062
FGSG_00257	4.03189	0.0114556	FGSG_10177	-1.84684	0.0266285	FGSG_04596	7.36899	2.06e-05	FGSG_06108	-1.51605	0.00149332	FGSG_08687	8.26212	1.08e-08	FGSG_03300	-1.2539	0.0057808	FGSG_13947	FGSG_13931
FGSG_06059	3.8379	0.0070908	FGSG_12647	-1.85156	0.0199929	FGSG_04975	7.28673	1.92e-05	FGSG_03869	-1.5804	0.0124052	FGSG_02059	8.25596	2.46e-06	FGSG_08601	-1.26552	0.0166919	FGSG_05108	FGSG_01409
FGSG_10156	3.73556	0.00779991	FGSG_04034	-1.85807	0.0459133	FGSG_03540	7.2713	1.71e-05	FGSG_11981	-1.58849	0.0193446	FGSG_04741	8.21003	4.79e-08	FGSG_04088	-1.278	0.000740208	FGSG_08335	FGSG_00500
FGSG_03269	3.7122	0.00674816	FGSG_04088	-1.88987	0.00864854	FGSG_11395	7.26743	1.54e-05	FGSG_10949	-1.61436	0.0419207	FGSG_11397	8.09605	2.37e-08	FGSG_08463	-1.29946	0.00295247	FGSG_13033	FGSG_04399
FGSG_05906	3.62839	0.00181787	FGSG_08941	-1.92273	0.000910698	FGSG_02051	7.11405	6.29e-05	FGSG_07612	-1.62181	0.0064274	FGSG_03695	8.07089	1.17e-06	FGSG_06751	-1.30188	0.00610294	FGSG_07237	FGSG_05254
FGSG_08407	3.50555	0.0496414	FGSG_02407	-1.9313	0.000254015	FGSG_00162	7.07381	0.000155038	FGSG_07262	-1.64532	0.0387252	FGSG_11495	8.05262	6.45e-07	FGSG_06493	-1.33967	0.00191055	FGSG_07186	FGSG_09883
FGSG_08439	3.35335	0.0420753	FGSG_03300	-1.95011	0.0410466	FGSG_10595	7.07247	0.000449379	FGSG_02322	-1.67362	0.0428513	FGSG_02814	8.0367	2.16e-08	FGSG_09162	-1.34611	0.0255129	FGSG_05615	FGSG_05255
FGSG_00028	3.11942	0.00749273	FGSG_09524	-1.9604	0.0114556	FGSG_09827	7.02955	0.00181088	FGSG_03278	-1.76459	0.0463598	FGSG_03585	7.90354	1.14e-07	FGSG_07303	-1.34674	0.0134226	FGSG_00421	FGSG_20050
FGSG_01553	3.03715	0.000954299	FGSG_04429	-1.9898	0.0202923	FGSG_05983	7.01462	0.000163537	FGSG_02271	-1.77161	0.000196041	FGSG_11399	7.79389	8.26e-07	FGSG_05601	-1.35154	0.00584316	FGSG_05777	FGSG_20054
FGSG_04470	3.00259	0.0416397	FGSG_02094	-2.0083	0.0186673	FGSG_03530	6.96597	0.000917907	FGSG_02251	-1.77389	0.0136544	FGSG_03190	7.75209	0.00022699	FGSG_02820	-1.36613	0.0333727	FGSG_04117	FGSG_20056
FGSG_03518	2.97869	0.000153987	FGSG_01409	-2.01266	0.03393	FGSG_11294	6.92628	0.000646325	FGSG_01553	-1.77937	0.0161997	FGSG_10999	7.62596	6.22e-05	FGSG_00470	-1.37112	0.0224906	FGSG_08786	FGSG_20049
FGSG_07631	2.9315	4.07e-06	FGSG_05798	-2.03296	0.0395591	FGSG_02966	6.81613	0.000128442	FGSG_09638	-1.80049	0.0243825	FGSG_11049	7.62001	3.02e-06	FGSG_10796	-1.37707	0.0120754	FGSG_05159	FGSG_20058
FGSG_08312	2.86802	9.09e-07	FGSG_12164	-2.04075	0.027653	FGSG_03908	6.80959	0.00408674	FGSG_04204	-1.80167	9.22e-05	FGSG_01770	7.615	1.31e-05	FGSG_09341	-1.38449	0.000466705	FGSG_09934	FGSG_20047
FGSG_08749	2.82017	0.00728098	FGSG_01027	-2.10133	0.00455763	FGSG_06469	6.80242	0.000412669	FGSG_05081	-1.88432	0.0164938	FGSG_03247	7.56189	2.35e-05	FGSG_00620	-1.38936	0.000819086	FGSG_06841	FGSG_20052
FGSG_02700	2.78651	0.0432576	FGSG_09906	-2.14681	0.000335406	FGSG_11258	6.7669	0.00182354	FGSG_07610	-1.90265	0.00483462	FGSG_04077	7.52124	4.55e-07	FGSG_02730	-1.3946	0.0226518	FGSG_10940	FGSG_20083
FGSG_07775	2.76857	0.00039144	FGSG_08736	-2.18131	0.0186673	FGSG_03061	6.75154	0.00221183	FGSG_03856	-1.937	0.00444721	FGSG_00539	7.50524	2.82e-05	FGSG_11147	-1.42371	0.00446802	FGSG_10908	FGSG_20079
FGSG_10949	2.72739	0.0466761	FGSG_02292	-2.26805	0.00864854	FGSG_04590	6.7388	0.000161065	FGSG_07833	-1.98898	0.00988471	FGSG_11079	7.48754	8.62e-07	FGSG_06307	-1.4308	0.0222373	FGSG_02785	FGSG_20074
FGSG_03123	2.66305	0.0301433	FGSG_09969	-2.28103	0.00936784	FGSG_00059	6.71795	0.00122434	FGSG_04605	-2.11106	0.0305325	FGSG_08077	7.47832	1.24e-05	FGSG_11981	-1.43727	0.0222559	FGSG_09870	FGSG_20084
FGSG_04392	2.62953	0.0135599	FGSG_02326	-2.28154	0.0269871	FGSG_02908	6.71639	0.00391558	FGSG_12547	-2.19237	0.0132804	FGSG_03599	7.44049	0.000536685	FGSG_03349	-1.43831	5.84e-05	FGSG_04470	FGSG_20080
FGSG_09638	2.60419	4.05e-07	FGSG_01224	-2.30218	0.00728098	FGSG_03114	6.65456	0.000670854	FGSG_00257	-2.19358	0.0349072	FGSG_06497	7.43652	9.98e-07	FGSG_08941	-1.44905	3.12e-05	FGSG_08439	FGSG_06246
FGSG_13033	2.54522	0.0239521	FGSG_02327	-2.32001	0.0253203	FGSG_04013	6.64893	0.00132441	FGSG_04439	-2.20215	0.000626047	FGSG_01771	7.41191	2.11e-05	FGSG_00681	-1.47482	0.000707841	FGSG_02700	FGSG_05374
FGSG_11878	2.52332	0.000138455	FGSG_04879	-2.32316	0.0274372	FGSG_09451	6.59008	0.000626047	FGSG_02551	-2.24072	0.0113416	FGSG_07562	7.40905	3.02e-06	FGSG_00947	-1.47542	0.0123065	FGSG_06290	FGSG_04117
FGSG_07262	2.47671	0.00327771	FGSG_05277	-2.3353	0.000661867	FGSG_04676	6.56907	0.00679697	FGSG_06925	-2.30715	0.0178205	FGSG_08609	7.39785	7.88e-06	FGSG_08702	-1.48609	0.00739936	FGSG_13028	FGSG_06583
FGSG_04876	2.42753	2.55e-05	FGSG_05738	-2.35109	0.026206	FGSG_03073	6.542	0.00149384	FGSG_02358	-2.45528	0.00182354	FGSG_05847	7.32775	9.18e-05	FGSG_00852	-1.50994	0.020032	FGSG_04824	FGSG_10003
FGSG_04452	2.39294	0.0261612	FGSG_02321	-2.41001	0.0184817	FGSG_06331	6.42169	0.00083959	FGSG_01745	-2.47698	2.06e-05	FGSG_03795	7.31652	0.000614535	FGSG_05656	-1.51023	9.96e-05	FGSG_10949	FGSG_12547
FGSG_00695	2.32121	0.0079352	FGSG_05601	-2.42361	0.0299108	FGSG_05824	6.39213	0.0175645	FGSG_20083	-2.51794	0.00012676	FGSG_09291	7.25033	4.23e-06	FGSG_13378	-1.52257	0.0234056	FGSG_01829	FGSG_02251
FGSG_08786	2.29286	0.0294266	FGSG_11310	-2.43089	0.0135599	FGSG_13939	6.29007	0.00991918	FGSG_20074	-2.56856	0.000278158	FGSG_07622	7.23675	1.41e-06	FGSG_04512	-1.52362	0.0461195	FGSG_07401	FGSG_01553
FGSG_06165	2.27743	0.00728098	FGSG_02641	-2.43919	8.76e-09	FGSG_06919	6.26339	0.00230004	FGSG_20058	-2.63408	3.95e-05	FGSG_03340	7.23113	1.65e-06	FGSG_04428	-1.5272	0.0368212	FGSG_04126	FGSG_05081
FGSG_11472	2.19556	0.00208517	FGSG_07611	-2.44513	0.0299108	FGSG_10185	6.25299	0.00149175	FGSG_20052	-2.63703	5.24e-05	FGSG_00563	7.20669	2.1e-06	FGSG_04207	-1.5277	0.0169917	FGSG_10257	FGSG_06925
FGSG_07274	2.19496	0.00597142	FGSG_07303	-2.44661	0.0395591	FGSG_07685	6.24763	0.00270297	FGSG_20049	-2.64336	2.91e-05	FGSG_03539	7.19982	2.21e-06	FGSG_04302	-1.5346	0.00103165	FGSG_00006	FGSG_08474
FGSG_05108	2.11094	0.0237893	FGSG_03732	-2.44895	0.04497	FGSG_04591	6.23829	0.00863584	FGSG_20047	-2.64762	4.43e-05	FGSG_02360	7.18461	1.31e-05	FGSG_09042	-1.54447	0.0300783	FGSG_02051	FGSG_09638
FGSG_02025	1.98268	0.00162455	FGSG_13422	-2.46226	2.83e-05	FGSG_03113	6.22889	0.00163013	FGSG_20054	-2.67287	2.36e-05	FGSG_05357	7.15841	2.43e-06	FGSG_04134	-1.54518	0.00011751	FGSG_01661	FGSG_13033
FGSG_01829	1.96391	0.0478892	FGSG_01379	-2.46271	0.00063223	FGSG_01585	6.21914	0.00208167	FGSG_20056	-2.70617	2.49e-05	FGSG_11169	7.14521	7.5e-05	FGSG_05309	-1.54561	0.0103348	FGSG_10202	FGSG_06154
FGSG_05422	1.95534	0.00728098	FGSG_08943	-2.48063	2.03e-07	FGSG_02315	6.21907	0.00187963	FGSG_20079	-2.80966	0.00019498	FGSG_10279	7.0675	3.49e-06	FGSG_02271	-1.55337	2.83e-05	FGSG_00162	FGSG_06054
FGSG_03072	1.95318	0.0148377	FGSG_03869	-2.49837	7.03e-09	FGSG_03987	6.21599	0.00217215	FGSG_20050	-2.83493	1.92e-05	FGSG_03049	7.06185	3.56e-05	FGSG_14018	-1.55673	3.08e-05	FGSG_11045	FGSG_00257
FGSG_08644	1.93999	0.00644932	FGSG_02880	-2.50222	0.0184817	FGSG_11047	6.1975	0.00325494	FGSG_20084	-2.84891	0.000489788	FGSG_03747	6.98656	5.66e-06	FGSG_04330	-1.58123	0.0334696	FGSG_11062	FGSG_02233
FGSG_01026	1.91571	0.00259583	FGSG_12474	-2.55337	0.0130446	FGSG_10993	6.18435	0.0178205	FGSG_20080	-3.07916	0.00122434	FGSG_03163	6.97282	3.56e-05	FGSG_08559	-1.59322	0.0459657	FGSG_03114	FGSG_04350
FGSG_04130	1.79913	0.0182801	FGSG_02358	-2.56982	2.58e-07	FGSG_09085	6.18242	0.0223277	FGSG_02343	-3.84707	7.78e-11	FGSG_11098	6.95459	6.16e-06	FGSG_04529	-1.59332	0.0453681	FGSG_06331	FGSG_07262
FGSG_02233	1.7511	0.0039628	FGSG_07477	-2.61962	0.00455763	FGSG_04637	6.17563	0.0085618	FGSG_00070	-4.14291	0.00149175	FGSG_03245	6.93196	4.59e-05	FGSG_09053	-1.59505	0.0318338	FGSG_00059	FGSG_05387
FGSG_01059	1.74359	0.00767969	FGSG_02264	-2.65973	0.00827528	FGSG_03430	6.13892	0.00394616	FGSG_08749	-5.84028	1.5e-20	FGSG_04293	6.89331	9.96e-06	FGSG_03524	-1.59764	0.0145306	FGSG_03073	FGSG_10949
FGSG_10908	1.72658	0.0391438	FGSG_02983	-2.70351	0.00572794	FGSG_03144	6.08862	0.0226081				FGSG_03911	6.84286	0.000913382	FGSG_08736	-1.6121	0.00047931	FGSG_10177	FGSG_06089
FGSG_10304	1.71968	0.0125003	FGSG_11900	-2.75172	0.00683398	FGSG_08011	6.06347	0.03721				FGSG_10990	6.83601	1.62e-05	FGSG_12767	-1.63369	0.0295207	FGSG_06919	FGSG_05932
FGSG_05594	1.71502	0.0150871	FGSG_05254	-2.87576	0.0435502	FGSG_03346	6.03563	0.00359862				FGSG_00765	6.75258	1.68e-05	FGSG_01224	-1.63404	0.00128519	FGSG_03554	FGSG_06424
FGSG_08844	1.71292	0.0311707	FGSG_12492	-2.87753	0.0449695	FGSG_08911	5.99766	0.00908736				FGSG_11099	6.74432	6.38e-05	FGSG_01544	-1.64869	0.0381395	FGSG_07685	FGSG_02641
FGSG_01882	1.68514	0.0254773	FGSG_01712	-2.95747	0.0374965	FGSG_13878	5.97227	0.00523752				FGSG_10206	6.74242	4.17e-05	FGSG_11980	-1.67014	0.00936544	FGSG_00165	FGSG_08943
FGSG_10940	1.67011	0.037474	FGSG_09883	-2.98933	0.0455283	FGSG_12485	5.95912	0.0107635				FGSG_11396	6.72729	1.82e-05	FGSG_00602	-1.6875	0.00496391	FGSG_03346	FGSG_01983
FGSG_03662	1.65514	0.0231922	FGSG_05826	-3.10997	0.0117554	FGSG_03695	5.93306	3.42e-05				FGSG_01596	6.71837	4.49e-05	FGSG_08347	-1.6903	0.0105783	FGSG_02908	FGSG_12737
FGSG_13028	1.65063	0.0447062	FGSG_12737	-3.12404	6.27e-06	FGSG_03934	5.91635	0.0102291				FGSG_10542	6.7165	0.000179173	FGSG_09539	-1.69325	1.17e-05	FGSG_07907	FGSG_13422
FGSG_06246	1.61297	0.00455937	FGSG_04988	-3.14482	0.000595969	FGSG_04407	5.90927	0.0117862				FGSG_12119	6.68238	0.000935875	FGSG_10772	-1.69711	1.02e-09	FGSG_10210	FGSG_08375
FGSG_09934	1.6105	0.0341436	FGSG_03153	-3.15161	0.00107914	FGSG_03842	5.90472	0.0293589				FGSG_09886	6.68054	0.000534409	FGSG_05826	-1.7108	0.00751038	FGSG_08130	FGSG_01674
FGSG_02658	1.54548	0.0197595	FGSG_01763	-3.25872	0.00106245	FGSG_05176	5.90066	0.0117534				FGSG_01765	6.65755	5.07e-05	FGSG_03956	-1.73466	0.00595201	FGSG_11488	FGSG_02407
FGSG_01870	1.50937	0.0221352	FGSG_04544	-3.43041	0.0294266	FGSG_04667	5.86803	0.0364556				FGSG_09373	6.65588	3.45e-05	FGSG_04023	-1.73588	0.00766074	FGSG_06010	FGSG_04988
FGSG_04117	1.48846	0.0294266	FGSG_08375	-3.56246	5e-05	FGSG_03635	5.84962	0.0321804				FGSG_03483	6.64357	6.98e-05	FGSG_07891	-1.74038	0.0046685	FGSG_07560	FGSG_01379
FGSG_06154	1.45687	0.0116066	FGSG_03326	-3.62622	0.00719355	FGSG_11099	5.20162	0.000251874				FGSG_11008	6.63747	4.98e-05	FGSG_02433	-1.75416	0.00513892	FGSG_08911	FGSG_05277
FGSG_05159	1.45249	0.0317476	FGSG_01983	-3.88399	1.51e-06	FGSG_11045	5.10681	0.000192172				FGSG_11037	6.63438	0.000450902	FGSG_05446	-1.768	3.49e-06	FGSG_04736	FGSG_11617
FGSG_04824	1.43081	0.0459232	FGSG_07302	-4.13105	0.00728098	FGSG_10999	5.07881	0.00631862				FGSG_07793	6.62031	7.02e-05	FGSG_01390	-1.77414	0.0102966	FGSG_07556	FGSG_08941
FGSG_02785	1.41895	0.0397667	FGSG_04093	-4.13569	0.0252999	FGSG_11098	4.87591	0.000228462				FGSG_07350	6.60535	0.00031241	FGSG_05310	-1.791	1.01e-10	FGSG_10200	FGSG_01763
FGSG_01217	1.39511	0.0114556	FGSG_02883	-4.14698	0.0296449	FGSG_11046	4.83946	0.000526154				FGSG_03248	6.58822	0.00175327	FGSG_03286	-1.79295	0.0104254	FGSG_05176	FGSG_03153
FGSG_00921	1.37017	0.00933659	FGSG_03236	-4.32667	0.0245156	FGSG_11062	4.70503	0.000196041				FGSG_00260	6.58557	0.0044312	FGSG_09980	-1.79668	3.17e-11	FGSG_04407	FGSG_05011
FGSG_13947	1.3363	0.0234508	FGSG_05255	-4.48184	0.0459232	FGSG_08077	4.45534	0.00293048				FGSG_03406	6.5831	0.000454557	FGSG_02499	-1.79756	0.00461914	FGSG_11326	FGSG_01027
FGSG_02077	1.32676	0.0161189	FGSG_00652	-4.5295	0.0407339	FGSG_05957	4.34627	0.0496352				FGSG_11029	6.57258	0.000182784	FGSG_03452	-1.80205	3.33e-07	FGSG_02353	FGSG_02983
FGSG_05777	1.32278	0.0271404	FGSG_11062	-4.81103	0.0299108	FGSG_10776	4.29974	4.12e-05				FGSG_11348	6.56977	0.000465248	FGSG_13412	-1.80383	0.00390217	FGSG_06619	FGSG_11900
FGSG_02542	1.28749	0.0135599	FGSG_02881	-4.8672	0.00869206	FGSG_04993	4.28646	0.0439184				FGSG_03184	6.56334	3.96e-05	FGSG_05654	-1.8213	0.0258374	FGSG_02488	FGSG_03326
FGSG_06290	1.2724	0.0436472	FGSG_09042	-4.89588	0.0114556	FGSG_06235	4.26167	0.000526622				FGSG_11398	6.54182	1.57e-16	FGSG_00790	-1.8287	0.0421121	FGSG_01974	FGSG_01224
FGSG_00421	1.23615	0.0270791	FGSG_03286	-5.19076	0.0186673	FGSG_11097	4.18157	0.000216676				FGSG_04596	6.52338	0.000135701	FGSG_01588	-1.83251	1.46e-05	FGSG_05255	FGSG_07692
FGSG_05615	1.23435	0.0253203	FGSG_00048	-5.33515	0.0192867	FGSG_03189	4.12274	8.19e-07				FGSG_07695	6.4904	0.00162311	FGSG_08397	-1.84089	8.11e-05	FGSG_00840	FGSG_02427
FGSG_04181	1.22687	0.0165906	FGSG_02794	-5.88271	0.00178713	FGSG_02691	4.08758	0.0212531				FGSG_02082	6.46551	6.98e-05	FGSG_12396	-1.84714	5.54e-08	FGSG_04155	FGSG_02264
FGSG_07237	1.20958	0.0241772	FGSG_00522	-6.54966	0.0391438	FGSG_11399	4.07487	0.00543552				FGSG_07483	6.46307	0.003901	FGSG_13675	-1.84756	0.00996313	FGSG_12138	FGSG_04088
FGSG_06841	1.10501	0.037474	FGSG_12296	-6.61447	0.026206	FGSG_04252	4.04923	0.0330736				FGSG_04975	6.44192	0.000125873	FGSG_08924	-1.86354	0.0276533	FGSG_02502	FGSG_02292
FGSG_08335	1.09253	0.0237893	FGSG_07685	-6.6275	0.0267313	FGSG_03867	4.04678	0.0282268				FGSG_03540	6.42586	0.00011004	FGSG_00554	-1.87295	0.000159335	FGSG_05352	FGSG_02881
FGSG_07401	1.08872	0.0496414	FGSG_04841	-6.68487	0.0234364	FGSG_02794	4.01955	0.0330736				FGSG_03336	6.42365	8.85e-05	FGSG_11617	-1.87857	5.29e-05	FGSG_02691	FGSG_09969
FGSG_07186	1.07569	0.0253203	FGSG_11345	-6.70698	0.0302438	FGSG_11488	3.94467	0.00749207				FGSG_11395	6.4208	9.86e-05	FGSG_10337	-1.90599	0.0080696	FGSG_09390	FGSG_08942
FGSG_09870	1.06469	0.0406102	FGSG_03593	-6.93544	0.0156449	FGSG_11029	3.94337	0.0123891				FGSG_01744	6.41709	9.08e-05	FGSG_02323	-1.9144	0.00293948	FGSG_04410	FGSG_09524
			FGSG_00059	-6.98816	0.00933486	FGSG_03011	3.93462	0.0207243				FGSG_08252	6.41499	9.96e-05	FGSG_02675	-1.91683	0.0197358	FGSG_11129	FGSG_09042
			FGSG_07692	-7.01291	0.00779991	FGSG_05942	3.92931	0.00314521				FGSG_11208	6.40685	0.000955511	FGSG_03688	-1.92834	0.000317162	FGSG_06720	FGSG_05826
			FGSG_02929	-7.07097	0.00659031	FGSG_10677	3.9265	9.75e-08				FGSG_11027	6.39921	0.000623567	FGSG_01356	-1.93196	0.0429682	FGSG_09906	FGSG_12474
			FGSG_08013	-7.18736	0.0227626	FGSG_12108	3.9159	0.0372667				FGSG_11046	6.39686	0.000115433	FGSG_01379	-1.96526	0.0313147	FGSG_01131	FGSG_11310
			FGSG_11440	-7.64729	0.000478944	FGSG_05255	3.84167	0.0155961				FGSG_13834	6.38403	0.000126416	FGSG_05741	-1.975	0.00915744	FGSG_03842	FGSG_03460
			FGSG_01674	-8.41612	0.000106001	FGSG_00443	3.79196	0.0423358				FGSG_11066	6.38022	0.0046685	FGSG_07833	-1.98524	1.16e-05	FGSG_09883	FGSG_03593
						FGSG_10257	3.77765	6e-06				FGSG_03335	6.34574	0.000115462	FGSG_06109	-1.9876	0.00390978	FGSG_12438	FGSG_05130
						FGSG_12555	3.7727	0.0064274				FGSG_11190	6.34313	0.000121439	FGSG_11479	-1.98921	0.00843448	FGSG_03635	FGSG_02880
						FGSG_11164	3.77121	0.000492756				FGSG_11033	6.33305	0.00641095	FGSG_07072	-1.99786	0.00927893	FGSG_01768	FGSG_02321
						FGSG_09738	3.75317	0.038313				FGSG_12206	6.32858	0.000197656	FGSG_01018	-2.00297	0.00031241	FGSG_04285	FGSG_08736
						FGSG_08048	3.71622	0.0482909				FGSG_06017	6.32526	0.000623567	FGSG_11385	-2.01488	0.0215521	FGSG_02794	FGSG_02094
						FGSG_03467	3.63615	0.000538269				FGSG_11411	6.28883	0.00168721	FGSG_02420	-2.01905	0.020747	FGSG_04252	FGSG_03286
						FGSG_05046	3.63464	0.000757502				FGSG_11478	6.27471	0.000235905	FGSG_03799	-2.0198	4.36e-06	FGSG_00173	FGSG_12647
						FGSG_04913	3.56103	0.0387252				FGSG_03011	6.26727	0.000719415	FGSG_03214	-2.02969	0.0380544	FGSG_04667	FGSG_04429
						FGSG_08002	3.55351	0.0166967				FGSG_07908	6.26003	0.000271895	FGSG_06287	-2.03131	0.00304534	FGSG_11101	FGSG_09980
						FGSG_10962	3.49985	3.26e-05				FGSG_08048	6.23399	0.000389462	FGSG_09969	-2.04578	3.31e-05	FGSG_08011	FGSG_04841
						FGSG_03483	3.49067	0.00149175				FGSG_10595	6.23135	0.00209273	FGSG_06752	-2.05151	0.00401032	FGSG_13064	FGSG_03236
						FGSG_07907	3.48963	0.00393909				FGSG_02428	6.22763	0.00031241	FGSG_02427	-2.05429	1.96e-15	FGSG_09738	FGSG_04093
						FGSG_08687	3.40793	1.05e-07				FGSG_00342	6.21797	0.000627399	FGSG_05481	-2.05517	0.0157224	FGSG_04913	FGSG_02327
						FGSG_03787	3.38257	0.0477788				FGSG_09827	6.19085	0.00608986	FGSG_09524	-2.05563	0.00250936	FGSG_03273	FGSG_02326
						FGSG_02428	3.37969	0.0428513				FGSG_03436	6.18877	0.000685251	FGSG_02321	-2.06343	0.0181559	FGSG_12105	FGSG_04879
						FGSG_00165	3.34641	0.00359862				FGSG_03124	6.18613	0.000718406	FGSG_09723	-2.07307	0.000179173	FGSG_04993	FGSG_12164
						FGSG_05357	3.30874	0.000243334				FGSG_05983	6.17219	0.000914988	FGSG_06564	-2.08089	0.00168526	FGSG_08359	FGSG_02751
						FGSG_07560	3.22533	0.00900511				FGSG_07794	6.16475	0.00306594	FGSG_12164	-2.08262	0.0001217	FGSG_10735	FGSG_04544
						FGSG_10855	3.21587	1.08e-19				FGSG_12282	6.16417	0.00310147	FGSG_03412	-2.0833	2.19e-06	FGSG_01891	FGSG_02883
						FGSG_09834	3.1965	0.0121733				FGSG_05461	6.14364	0.00031902	FGSG_01252	-2.08391	6.4e-07	FGSG_05912	FGSG_05601
						FGSG_05663	3.18133	0.0049767				FGSG_09353	6.14223	0.0003777	FGSG_12563	-2.09362	0.00630614	FGSG_01675	FGSG_07611
						FGSG_01755	3.15919	0.03129				FGSG_00288	6.13474	0.000647605	FGSG_10338	-2.10384	0.000211524	FGSG_05957	FGSG_02402
						FGSG_13194	3.13312	0.00336802				FGSG_12573	6.12024	0.0022118	FGSG_02322	-2.12966	4.34e-09	FGSG_20079	FGSG_01561
						FGSG_03245	3.12619	0.0137931				FGSG_03530	6.11957	0.00378694	FGSG_08973	-2.14125	9.93e-06	FGSG_20058	FGSG_11345
						FGSG_04736	3.09112	0.0100386				FGSG_11294	6.08262	0.00291448	FGSG_02094	-2.18185	0.00160911	FGSG_20056	FGSG_09341
						FGSG_00342	3.09024	0.0252479				FGSG_00301	6.07457	0.000707841	FGSG_02464	-2.19002	0.000909366	FGSG_20084	FGSG_01712
						FGSG_09390	3.08359	0.0217709				FGSG_00184	6.07308	0.000913382	FGSG_05574	-2.1923	0.000743864	FGSG_20054	FGSG_00522
						FGSG_06127	3.07722	0.00359862				FGSG_01757	6.06479	0.00042104	FGSG_09749	-2.20867	0.00141768	FGSG_20083	FGSG_07303
						FGSG_12438	3.0692	0.0314126				FGSG_11114	6.05023	0.00113878	FGSG_02402	-2.20949	1.2e-08	FGSG_20049	FGSG_05798
						FGSG_01744	3.06576	0.00325554				FGSG_01169	6.0356	0.000979228	FGSG_08375	-2.21061	0.000283579	FGSG_20074	FGSG_00652
						FGSG_09883	2.90652	0.0297558				FGSG_05747	6.02722	0.00148135	FGSG_02899	-2.21094	0.0148778	FGSG_20052	FGSG_03300
						FGSG_07556	2.87754	0.0116983				FGSG_13718	6.02683	0.000739332	FGSG_11480	-2.23197	0.000439341	FGSG_20047	FGSG_12492
						FGSG_00840	2.8765	0.015723				FGSG_12821	6.02575	0.000660609	FGSG_05584	-2.23864	0.00233582	FGSG_20050	FGSG_03732
						FGSG_07188	2.82464	0.00750474				FGSG_11366	6.01289	0.00182711	FGSG_03528	-2.2416	0.00605366	FGSG_08312	FGSG_04034
						FGSG_03632	2.75617	0.000124097				FGSG_03175	6.01174	0.00233582	FGSG_00741	-2.2426	0.0326606	FGSG_06463	FGSG_08749
						FGSG_11397	2.74344	0.00240449				FGSG_01988	5.9992	0.00563824	FGSG_12737	-2.24277	1.9e-09	FGSG_07631	FGSG_02343
						FGSG_00330	2.72219	0.000196041				FGSG_08002	5.99613	0.00177379	FGSG_00140	-2.2486	1.06e-07	FGSG_06445	FGSG_01745
						FGSG_08012	2.70315	0.000638958				FGSG_11568	5.97817	0.00291846	FGSG_06888	-2.24994	0.017034	FGSG_04876	FGSG_04204
						FGSG_07622	2.67546	0.0164938				FGSG_03908	5.9683	0.0116578	FGSG_01378	-2.25008	0.000955997	FGSG_00571	FGSG_02271
						FGSG_06452	2.67427	0.0393427				FGSG_02966	5.96624	0.000740208	FGSG_03460	-2.28044	0.00683756	FGSG_11878	FGSG_04439
						FGSG_10224	2.65836	0.0217709				FGSG_12534	5.9605	0.00072496	FGSG_13090	-2.29092	0.0222373	FGSG_07775	FGSG_00070
						FGSG_02502	2.64114	0.0183606				FGSG_06469	5.9588	0.00203678	FGSG_12129	-2.29152	0.00204628	FGSG_04077	FGSG_06108
						FGSG_03715	2.59639	0.000759104				FGSG_01755	5.9574	0.00153686	FGSG_08816	-2.29651	0.0185915	FGSG_11184	FGSG_03856
						FGSG_11101	2.59573	0.03721				FGSG_00657	5.95518	0.000909346	FGSG_08799	-2.31903	0.0275482	FGSG_02025	FGSG_07610
						FGSG_02202	2.54072	1.3e-08				FGSG_11112	5.94275	0.0022118	FGSG_04429	-2.32252	0.000197426	FGSG_05906	FGSG_07612
						FGSG_04335	2.52935	0.0217709				FGSG_11258	5.926	0.00639451	FGSG_03015	-2.32313	0.0497361	FGSG_11472	FGSG_09887
						FGSG_01818	2.51982	0.0262139				FGSG_13536	5.92337	0.00114365	FGSG_00483	-2.33531	0.00306594	FGSG_01026	FGSG_04134
						FGSG_10982	2.50414	0.0317219				FGSG_05324	5.92068	0.00549018	FGSG_02160	-2.34149	2.11e-06	FGSG_08253	FGSG_07833
						FGSG_02467	2.46907	0.0476675				FGSG_04234	5.92026	0.00109289	FGSG_02751	-2.34761	6.89e-13	FGSG_07274	FGSG_03349
						FGSG_08684	2.42818	0.000845689				FGSG_03061	5.90436	0.00748881	FGSG_04194	-2.35116	1.02e-09	FGSG_03269	FGSG_01588
						FGSG_11398	2.39442	3.74e-08				FGSG_01461	5.90337	0.000955997	FGSG_09070	-2.36219	0.0437324	FGSG_03347	FGSG_02551
						FGSG_04126	2.39322	9.68e-07				FGSG_04590	5.89118	0.000912483	FGSG_12409	-2.37561	0.0332218	FGSG_06059	FGSG_10772
						FGSG_02488	2.3655	0.0140211				FGSG_03922	5.86478	0.00206618	FGSG_05146	-2.38692	0.0182618	FGSG_00028	FGSG_11981
						FGSG_07863	2.35255	3.56e-07				FGSG_09521	5.8476	0.00255791	FGSG_06526	-2.38827	8.21e-11	FGSG_10156	FGSG_06526
						FGSG_03554	2.34657	0.00240449				FGSG_00209	5.84059	0.00114365	FGSG_02379	-2.42973	0.0258374	FGSG_02542	FGSG_04605
						FGSG_09304	2.33711	0.000114661				FGSG_11164	5.8323	0.0490428	FGSG_10952	-2.43082	0.0461195	FGSG_05594	FGSG_04302
						FGSG_02087	2.33335	4.63e-05				FGSG_09834	5.81531	4.16e-07	FGSG_11232	-2.4501	0.0140283	FGSG_02077	FGSG_05310
						FGSG_10200	2.33233	0.0117534				FGSG_04013	5.80339	0.00509524	FGSG_03158	-2.45426	1.41e-06	FGSG_04130	FGSG_05554
						FGSG_08130	2.3227	0.00576389				FGSG_06612	5.79589	0.0031965	FGSG_03278	-2.45509	6.84e-08	FGSG_03700	FGSG_02322
						FGSG_11303	2.29255	0.000689832				FGSG_04603	5.78588	0.00401032	FGSG_13112	-2.47387	0.0411233	FGSG_03662	FGSG_03278
						FGSG_03424	2.26529	0.015723				FGSG_11339	5.78586	0.00688042	FGSG_05011	-2.4779	1.07e-11	FGSG_04452	FGSG_13562
						FGSG_05912	2.24902	0.0482679				FGSG_07772	5.76826	0.0185944	FGSG_09195	-2.50905	0.00031241	FGSG_03123	FGSG_00143
						FGSG_07988	2.20939	0.0429708				FGSG_08253	5.76308	4e-06	FGSG_02324	-2.51111	0.0110883	FGSG_08844	FGSG_01764
						FGSG_10210	2.16319	0.00523752				FGSG_09451	5.74065	0.00291782	FGSG_02828	-2.51603	0.00148135	FGSG_08407	FGSG_06551
						FGSG_11326	2.14937	0.0123891				FGSG_05663	5.72844	2.11e-07	FGSG_04204	-2.52028	1.27e-11	FGSG_00071	FGSG_03959
						FGSG_03968	2.1376	0.00209607				FGSG_04676	5.72519	0.0177234	FGSG_03327	-2.52133	0.00611702	FGSG_03535	FGSG_02272
						FGSG_13954	2.12542	0.0208583				FGSG_11080	5.71603	0.0060394	FGSG_11776	-2.52657	0.0469735	FGSG_07896	FGSG_02903
						FGSG_06720	2.12042	0.0240468				FGSG_11081	5.70318	0.007804	FGSG_13008	-2.53342	0.00547025	FGSG_10855	FGSG_02750
						FGSG_12666	2.1102	0.0258149				FGSG_07137	5.6975	0.00228203	FGSG_05269	-2.53566	0.00936544	FGSG_10397	FGSG_03111
						FGSG_06993	2.10901	0.0412799				FGSG_07108	5.69407	0.00282177	FGSG_02551	-2.54555	1.9e-11	FGSG_03543	FGSG_00002
						FGSG_11129	2.10719	0.0239653				FGSG_10631	5.69234	0.007804	FGSG_08942	-2.5469	9.42e-17	FGSG_00007	FGSG_07136
						FGSG_11008	2.10511	0.0391556				FGSG_04615	5.69191	0.00277506	FGSG_13314	-2.55343	4.04e-07	FGSG_03537	FGSG_06480
						FGSG_03148	2.06567	0.00163013				FGSG_03448	5.68546	0.00703342	FGSG_10333	-2.58842	0.0126973	FGSG_02202	FGSG_05075
						FGSG_07866	2.05338	0.0290102				FGSG_06671	5.68184	0.00761136	FGSG_11150	-2.59913	0.00205711	FGSG_10677	FGSG_05947
						FGSG_11494	2.00786	0.0204849				FGSG_03157	5.67098	0.00476524	FGSG_08172	-2.61103	0.000291314	FGSG_08687	FGSG_03894
						FGSG_09493	2.0071	0.000296338				FGSG_04575	5.63842	0.00275549	FGSG_04439	-2.61731	9.98e-07	FGSG_05042	FGSG_12935
						FGSG_10974	2.00382	0.0219477				FGSG_08121	5.63478	0.00312592	FGSG_00619	-2.62446	0.000863473	FGSG_03539	FGSG_05682
						FGSG_03466	1.98595	4.81e-05				FGSG_06236	5.63251	0.00509222	FGSG_02589	-2.64003	1.36e-06	FGSG_07863	FGSG_05859
						FGSG_01866	1.98534	0.000132207				FGSG_04732	5.61104	0.00808834	FGSG_07612	-2.64685	3.15e-12	FGSG_07562	FGSG_04194
						FGSG_01131	1.98328	0.0288099				FGSG_08422	5.60425	0.00415975	FGSG_03728	-2.64786	0.0493171	FGSG_03189	FGSG_03230
						FGSG_08946	1.95916	0.00356827				FGSG_12648	5.60308	0.00298248	FGSG_05859	-2.66517	9.46e-10	FGSG_01770	FGSG_02882
						FGSG_10022	1.94087	0.0232288				FGSG_13240	5.60294	0.00330499	FGSG_02326	-2.67401	0.0182299	FGSG_10990	FGSG_13383
						FGSG_14015	1.90887	0.0359261				FGSG_07299	5.60241	0.00489871	FGSG_03846	-2.68094	0.0190827	FGSG_01771	FGSG_12396
						FGSG_01675	1.85562	0.049321				FGSG_04932	5.6007	0.00416512	FGSG_03856	-2.69956	1.62e-05	FGSG_00539	FGSG_00664
						FGSG_06506	1.8464	7.52e-05				FGSG_02252	5.5994	0.00322038	FGSG_02327	-2.70521	0.0355147	FGSG_03184	FGSG_07690
						FGSG_03494	1.82627	0.00556091				FGSG_03770	5.58581	0.0031764	FGSG_02272	-2.70656	3.97e-16	FGSG_01596	FGSG_00140
						FGSG_05352	1.81501	0.0199573				FGSG_08391	5.58078	0.00306594	FGSG_07611	-2.7074	5.54e-08	FGSG_01765	FGSG_03452
						FGSG_01768	1.80734	0.0330736				FGSG_02155	5.57433	0.0145816	FGSG_02407	-2.71178	3.81e-13	FGSG_01523	FGSG_13314
						FGSG_01523	1.78365	1.25e-05				FGSG_10243	5.57313	0.00430135	FGSG_02550	-2.71315	8.64e-06	FGSG_05847	FGSG_01252
						FGSG_06619	1.74997	0.0138741				FGSG_13134	5.56904	0.0101149	FGSG_00416	-2.73424	0.00191154	FGSG_11395	FGSG_12475
						FGSG_02814	1.72503	0.0392534				FGSG_09398	5.56831	0.00319639	FGSG_08943	-2.73699	1.34e-17	FGSG_03540	FGSG_02589
						FGSG_06010	1.71792	0.00899982				FGSG_10011	5.55961	0.00675386	FGSG_02330	-2.73913	0.00110195	FGSG_04975	FGSG_03158
						FGSG_10177	1.68108	0.00181088				FGSG_05824	5.55335	0.0380544	FGSG_08378	-2.76763	1.42e-05	FGSG_04596	FGSG_02220
						FGSG_12105	1.66674	0.0429708				FGSG_11367	5.55163	0.00550809	FGSG_00542	-2.78777	0.0305361	FGSG_10542	FGSG_02160
						FGSG_09382	1.65364	0.0112496				FGSG_03526	5.54411	0.0427011	FGSG_10339	-2.79274	7.41e-06	FGSG_10962	FGSG_03412
						FGSG_06784	1.62549	0.000296338				FGSG_13856	5.54382	0.00503604	FGSG_12647	-2.8016	1.62e-10	FGSG_03695	FGSG_00076
						FGSG_04155	1.61694	0.015723				FGSG_00443	5.54044	0.00485475	FGSG_07495	-2.81411	1.06e-05	FGSG_10776	FGSG_05446
						FGSG_10202	1.60868	9.71e-05				FGSG_05080	5.53618	0.00446342	FGSG_05277	-2.82999	1.78e-07	FGSG_02087	FGSG_03799
						FGSG_08809	1.59437	0.000132147				FGSG_00623	5.52834	0.00489871	FGSG_07689	-2.83329	0.00587887	FGSG_03466	FGSG_09098
						FGSG_12112	1.58204	0.00687676				FGSG_03867	5.52773	0.00458428	FGSG_05063	-2.8574	0.00255791	FGSG_06506	FGSG_06676
						FGSG_10735	1.5537	0.0449269				FGSG_05660	5.52499	0.00540572	FGSG_07832	-2.90407	0.0248927	FGSG_00979	FGSG_09277
						FGSG_02353	1.50676	0.0134831				FGSG_00775	5.52177	0.0040943	FGSG_03288	-2.94087	0.00608986	FGSG_03599	FGSG_10339
						FGSG_08359	1.4939	0.0441308				FGSG_10119	5.52056	0.00828046	FGSG_05959	-2.95128	0.00378969	FGSG_09304	FGSG_02104
						FGSG_08459	1.48886	0.0301453				FGSG_07309	5.51858	0.00706489	FGSG_04987	-2.96697	1.38e-05	FGSG_03632	FGSG_02550
						FGSG_03273	1.45356	0.0407937				FGSG_01208	5.49708	0.00568324	FGSG_08749	-2.97148	0.0165342	FGSG_02966	FGSG_08973
						FGSG_01882	1.40579	0.0127042				FGSG_01819	5.47796	0.00719713	FGSG_07136	-2.97179	1.21e-11	FGSG_08809	FGSG_07495
						FGSG_04410	1.39943	0.0230028				FGSG_12764	5.46923	0.00745195	FGSG_07017	-2.97322	0.000777961	FGSG_01866	FGSG_09539
						FGSG_09906	1.39344	0.0274676				FGSG_09052	5.46223	0.0134226	FGSG_07911	-2.98488	0.0133567	FGSG_04590	FGSG_10983
						FGSG_03518	1.37742	0.015723				FGSG_05865	5.45918	0.00509222	FGSG_07691	-2.98584	0.000115433	FGSG_05983	FGSG_04987
						FGSG_05720	1.36898	0.0349072				FGSG_13939	5.45059	0.0239829	FGSG_07767	-3.00778	0.0136148	FGSG_12119	FGSG_08378
						FGSG_09722	1.34667	0.03129				FGSG_01491	5.43975	0.0128759	FGSG_09277	-3.01869	6.51e-06	FGSG_00330	FGSG_00142
						FGSG_04285	1.34326	0.0330736				FGSG_12851	5.4391	0.0129902	FGSG_00652	-3.03965	0.029092	FGSG_11097	FGSG_14018
						FGSG_00979	1.33506	9.45e-05				FGSG_02698	5.42733	0.00927893	FGSG_07610	-3.04283	2.12e-45	FGSG_11098	FGSG_05334
						FGSG_12937	1.32754	0.00611215				FGSG_07665	5.4261	0.00957469	FGSG_10241	-3.04448	0.00274895	FGSG_05357	FGSG_11888
						FGSG_07478	1.28972	0.0321804				FGSG_06504	5.42555	0.00749893	FGSG_04605	-3.05293	0.00250936	FGSG_11099	FGSG_03314
						FGSG_12138	1.275	0.0167435				FGSG_06016	5.42175	0.00584316	FGSG_02292	-3.06974	3.46e-05	FGSG_06784	FGSG_01555
						FGSG_09321	1.27421	0.0113387				FGSG_07080	5.406	0.00720989	FGSG_09364	-3.0718	0.0166328	FGSG_09493	FGSG_08397
						FGSG_00173	1.26935	0.0330908				FGSG_10185	5.40434	0.00582611	FGSG_08137	-3.10107	0.0118372	FGSG_06469	FGSG_02823
						FGSG_13000	1.25148	0.015723				FGSG_12108	5.39817	0.00610294	FGSG_00049	-3.10231	0.0120754	FGSG_10595	FGSG_05656
						FGSG_09266	1.23799	0.00184087				FGSG_04591	5.3867	0.021957	FGSG_04283	-3.10552	0.00011004	FGSG_11164	FGSG_04283
						FGSG_13064	1.12677	0.0375314				FGSG_03199	5.38548	0.019547	FGSG_04034	-3.11484	1.52e-05	FGSG_11046	FGSG_07691
						FGSG_01974	1.08789	0.0141924				FGSG_03113	5.38046	0.00627077	FGSG_11900	-3.15677	0.000394381	FGSG_06235	FGSG_00554
						FGSG_09205	1.04447	0.00916809				FGSG_01918	5.37826	0.00766074	FGSG_05620	-3.16422	0.00926789	FGSG_03467	FGSG_09723
						FGSG_01891	1.03946	0.0457463				FGSG_06261	5.37471	0.0205104	FGSG_02339	-3.17247	0.0112188	FGSG_09451	FGSG_07894
												FGSG_02315	5.37308	0.00706489	FGSG_02220	-3.19076	1.79e-06	FGSG_08012	FGSG_00036
												FGSG_03987	5.36949	0.007804	FGSG_10983	-3.20274	1.23e-05	FGSG_11294	FGSG_03592
												FGSG_01585	5.36946	0.00749893	FGSG_05682	-3.20534	8.62e-10	FGSG_11303	FGSG_10338
												FGSG_01466	5.36843	0.007804	FGSG_02641	-3.21495	1.02e-08	FGSG_05046	FGSG_08172
												FGSG_11047	5.35136	0.0105783	FGSG_13422	-3.22774	8.83e-17	FGSG_03715	FGSG_09195
												FGSG_03149	5.34465	0.0224246	FGSG_11888	-3.24909	3.54e-05	FGSG_08684	FGSG_01018
												FGSG_09085	5.34292	0.0472787	FGSG_01027	-3.27319	4.69e-28	FGSG_03530	FGSG_03688
												FGSG_09325	5.34066	0.00766074	FGSG_01712	-3.27843	1.54e-09	FGSG_04013	FGSG_11480
												FGSG_10993	5.33809	0.0400725	FGSG_07894	-3.29009	0.00018203	FGSG_03483	FGSG_10300
												FGSG_04637	5.33405	0.0218493	FGSG_03894	-3.32796	1.85e-10	FGSG_10185	FGSG_00681
												FGSG_03347	5.32541	2.34e-05	FGSG_02864	-3.33058	0.00169993	FGSG_03113	FGSG_05574
												FGSG_09267	5.32207	0.0112188	FGSG_05798	-3.33978	1.93e-18	FGSG_03148	FGSG_07017
												FGSG_12415	5.32038	0.0123553	FGSG_05075	-3.35038	3.9e-11	FGSG_09827	FGSG_05679
												FGSG_11249	5.3143	1.98e-07	FGSG_03111	-3.36933	1.92e-12	FGSG_11258	FGSG_00620
												FGSG_02975	5.30118	0.00915744	FGSG_01745	-3.37161	7.73e-19	FGSG_09266	FGSG_00619
												FGSG_11183	5.30088	0.0152749	FGSG_03729	-3.3778	0.00322038	FGSG_02315	FGSG_02464
												FGSG_06569	5.29429	0.00909575	FGSG_04740	-3.41639	0.00279009	FGSG_01585	FGSG_01378
												FGSG_03430	5.28985	0.0125515	FGSG_12596	-3.42257	0.0308437	FGSG_03968	FGSG_02330
												FGSG_07639	5.28923	0.0157439	FGSG_02903	-3.43285	2.78e-13	FGSG_03987	FGSG_02159
												FGSG_10113	5.28439	0.00858572	FGSG_02159	-3.46253	0.0012099	FGSG_03061	FGSG_09749
												FGSG_11811	5.28328	0.0317001	FGSG_07690	-3.50235	1.04e-07	FGSG_11397	FGSG_03017
												FGSG_02440	5.27487	0.00885539	FGSG_10969	-3.51146	0.019462	FGSG_08077	FGSG_06359
												FGSG_06440	5.26967	0.0157778	FGSG_05334	-3.54876	3.24e-05	FGSG_05942	FGSG_02828
												FGSG_09136	5.26762	0.0185447	FGSG_07503	-3.56774	0.0168291	FGSG_11047	FGSG_06564
												FGSG_03144	5.25036	0.048412	FGSG_10752	-3.56864	0.00749893	FGSG_01744	FGSG_02864
												FGSG_05683	5.24934	0.0150577	FGSG_09098	-3.59224	4.44e-06	FGSG_13194	FGSG_00047
												FGSG_03700	5.24774	3.54e-07	FGSG_00046	-3.62769	0.00688042	FGSG_08946	FGSG_06493
												FGSG_03813	5.22049	0.0122813	FGSG_10300	-3.62871	0.000647605	FGSG_06127	FGSG_00416
												FGSG_04528	5.21052	0.0116389	FGSG_12248	-3.64991	0.0079357	FGSG_03430	FGSG_12129
												FGSG_09354	5.20335	0.0148572	FGSG_00196	-3.67604	0.0195129	FGSG_03908	FGSG_11150
												FGSG_11254	5.20273	0.031413	FGSG_09567	-3.68707	0.0354195	FGSG_05663	FGSG_05584
												FGSG_08309	5.20257	5.39e-08	FGSG_00742	-3.71246	0.0301146	FGSG_13878	FGSG_11439
												FGSG_03600	5.19799	0.0303659	FGSG_10914	-3.74852	0.00749893	FGSG_11399	FGSG_05063
												FGSG_01633	5.19505	0.019951	FGSG_12597	-3.74867	0.0073165	FGSG_03494	FGSG_13637
												FGSG_00007	5.19017	6.68e-08	FGSG_09759	-3.79127	0.0368464	FGSG_12937	FGSG_10241
												FGSG_06812	5.1884	0.0133162	FGSG_00036	-3.82634	0.000200329	FGSG_10999	FGSG_04740
												FGSG_13575	5.17932	0.0221339	FGSG_00522	-3.83154	0.00272806	FGSG_12555	FGSG_03898
												FGSG_09563	5.17331	0.0262134	FGSG_11381	-3.85294	0.0116076	FGSG_04676	FGSG_10800
												FGSG_05523	5.17303	0.0133567	FGSG_03732	-3.87708	0.000105746	FGSG_12112	FGSG_02323
												FGSG_11428	5.1614	0.0239829	FGSG_05679	-3.87909	0.000786989	FGSG_07188	FGSG_08463
												FGSG_07275	5.12928	0.0197076	FGSG_04543	-3.94048	0.0262134	FGSG_04637	FGSG_10522
												FGSG_13878	5.12264	0.0157224	FGSG_11439	-3.95629	0.00249261	FGSG_04591	FGSG_06287
												FGSG_12485	5.11699	0.0268288	FGSG_02343	-3.95893	1.46e-14	FGSG_09205	FGSG_00483
												FGSG_04151	5.11573	0.0315342	FGSG_13562	-3.97914	7.45e-23	FGSG_13939	FGSG_03729
												FGSG_00604	5.11566	0.0182575	FGSG_08587	-4.04769	0.0187237	FGSG_03934	FGSG_05959
												FGSG_01980	5.10657	0.0164635	FGSG_03869	-4.05785	9.12e-63	FGSG_12485	FGSG_13412
												FGSG_12605	5.10483	0.0195627	FGSG_03293	-4.12045	0.0409232	FGSG_09382	FGSG_06109
												FGSG_02169	5.10086	0.0215521	FGSG_04958	-4.15066	0.0368212	FGSG_09321	FGSG_01088
												FGSG_06972	5.09031	0.0198214	FGSG_03265	-4.16016	0.00787027	FGSG_09834	FGSG_06752
												FGSG_03934	5.06276	0.0262134	FGSG_12474	-4.18207	4.17e-23	FGSG_11029	FGSG_11147
												FGSG_06537	5.05847	0.019813	FGSG_03230	-4.21422	6.24e-09	FGSG_03245	FGSG_02499
												FGSG_13938	5.04473	0.0397669	FGSG_02983	-4.27242	0.00547025	FGSG_03190	FGSG_07891
												FGSG_00806	5.04133	6.26e-14	FGSG_00070	-4.31063	9.84e-05	FGSG_13000	FGSG_09832
												FGSG_12016	5.02611	0.0207976	FGSG_04988	-4.3134	1.25e-34	FGSG_07622	FGSG_00602
												FGSG_10065	4.98602	0.0317222	FGSG_02264	-4.33731	4.12e-16	FGSG_08002	FGSG_02433
												FGSG_12111	4.98574	0.0327271	FGSG_12935	-4.34787	4.77e-10	FGSG_05824	FGSG_13008
												FGSG_09404	4.97967	0.0351625	FGSG_02882	-4.36059	1.47e-08	FGSG_10993	FGSG_05349
												FGSG_00028	4.93395	9.42e-34	FGSG_03898	-4.38989	0.00285289	FGSG_11494	FGSG_07689
												FGSG_13616	4.93042	0.043055	FGSG_00143	-4.43357	9.45e-22	FGSG_03011	FGSG_03956
												FGSG_02632	4.90135	8.54e-06	FGSG_05349	-4.68897	0.00547025	FGSG_13954	FGSG_03528
												FGSG_10022	4.8852	1.44e-11	FGSG_04841	-4.7623	0.0190924	FGSG_10224	FGSG_03288
												FGSG_03002	4.73582	0.00031241	FGSG_06480	-4.7835	2.07e-11	FGSG_04335	FGSG_06751
												FGSG_10962	4.6873	3.56e-05	FGSG_06551	-4.79287	1.45e-16	FGSG_10974	FGSG_03327
												FGSG_12112	4.67733	1.41e-06	FGSG_04093	-4.88644	2.7e-08	FGSG_09085	FGSG_12563
												FGSG_03629	4.66959	0.000193433	FGSG_02207	-4.92559	0.0257294	FGSG_03144	FGSG_07066
												FGSG_03968	4.62573	1.15e-09	FGSG_04879	-4.93193	8.49e-08	FGSG_10022	FGSG_00046
												FGSG_06059	4.61318	1.67e-08	FGSG_02358	-5.00503	6.06e-31	FGSG_00342	FGSG_12597
												FGSG_07188	4.59728	2.12e-06	FGSG_07066	-5.09407	0.00682314	FGSG_12666	FGSG_08702
												FGSG_11494	4.56769	0.000204225	FGSG_12493	-5.14629	0.0085649	FGSG_01818	FGSG_10752
												FGSG_11305	4.55367	3.87e-05	FGSG_01983	-5.24985	1.3e-28	FGSG_03867	FGSG_10914
												FGSG_03883	4.54358	0.000765621	FGSG_12475	-5.46047	1.12e-06	FGSG_07866	FGSG_04023
												FGSG_10982	4.54044	0.000550131	FGSG_02104	-5.47931	8.03e-06	FGSG_08459	FGSG_03265
												FGSG_06618	4.49713	0.00642853	FGSG_07692	-5.49429	0.00105713	FGSG_01755	FGSG_12248
												FGSG_06545	4.49712	0.000920932	FGSG_00142	-5.52172	2.41e-05	FGSG_09722	FGSG_10337
												FGSG_02681	4.46328	0.00116352	FGSG_02823	-5.54043	8.32e-05	FGSG_10982	FGSG_11479
												FGSG_06613	4.43236	0.000617516	FGSG_01088	-5.61164	0.00397797	FGSG_07478	FGSG_12493
												FGSG_07130	4.38661	0.0315216	FGSG_13637	-5.71615	0.00256347	FGSG_05720	FGSG_01993
												FGSG_13194	4.38272	0.000647605	FGSG_11310	-5.71963	7.88e-18	FGSG_14015	FGSG_05741
												FGSG_12166	4.36397	0.000337641	FGSG_02750	-5.7706	3.38e-13	FGSG_12108	FGSG_05620
												FGSG_03518	4.36048	1.44e-14	FGSG_03326	-5.82663	6.44e-16	FGSG_11008	FGSG_07072
												FGSG_01603	4.35748	0.023872	FGSG_03153	-5.87196	4.5e-10	FGSG_02814	FGSG_05269
												FGSG_07988	4.29596	1.43e-06	FGSG_06676	-5.89949	5.23e-06	FGSG_06452	FGSG_11980
												FGSG_10776	4.26616	2.1e-05	FGSG_02883	-6.33003	3.63e-05	FGSG_06993	FGSG_13675
												FGSG_08686	4.24997	0.000418342	FGSG_02880	-6.44636	1.22e-16	FGSG_00443	FGSG_01390
												FGSG_12555	4.2328	0.000661023	FGSG_00002	-6.51172	5.85e-12	FGSG_02428	FGSG_05309
												FGSG_08407	4.23005	0.000935875	FGSG_00076	-6.80151	3.08e-06	FGSG_07988	FGSG_08347
												FGSG_02202	4.21257	4.88e-16	FGSG_02881	-6.9215	1.12e-08	FGSG_02467	FGSG_02324
												FGSG_05906	4.18496	0.00097634	FGSG_04544	-7.30219	1.44e-11	FGSG_03787	FGSG_02339
												FGSG_05046	4.13511	0.00310147	FGSG_05947	-7.55587	4.66e-11	FGSG_08048	FGSG_11381
												FGSG_04580	4.13017	0.00146432	FGSG_03314	-8.27786	7.23e-05	FGSG_03518	FGSG_08137
												FGSG_03725	4.1132	0.00376112	FGSG_03592	-8.53907	0.000210858	FGSG_03424	FGSG_10796
												FGSG_09821	4.0696	0.0132449	FGSG_00047	-8.71728	0.00180603	FGSG_11398	FGSG_00049
												FGSG_04335	4.06208	0.00039161	FGSG_11345	-9.09797	1.01e-05	FGSG_01882	FGSG_00947
												FGSG_13954	4.04816	0.000200329	FGSG_00664	-9.29711	7.05e-08	FGSG_00806	FGSG_10333
												FGSG_10326	4.04583	0.0245319	FGSG_03593	-9.32828	1.74e-06	FGSG_02839	FGSG_07911
												FGSG_11228	4.02455	0.00886108	FGSG_13383	-9.38934	3.01e-08	FGSG_04741	FGSG_07767
												FGSG_03269	3.99652	7.95e-06	FGSG_03236	-9.9359	3.56e-10	FGSG_08309	FGSG_11232
												FGSG_13300	3.98385	0.00363628	FGSG_12492	-10.4716	1.92e-12	FGSG_09367	FGSG_03524
												FGSG_03191	3.9607	0.00442686	FGSG_01674	-10.8088	4.08e-08	FGSG_03745	FGSG_02899
												FGSG_05933	3.91198	0.0282526	FGSG_03959	-11.6705	2.67e-16	FGSG_03585	FGSG_05481
												FGSG_02578	3.90122	0.00322038	FGSG_01764	-11.9535	8.44e-18	FGSG_09955	FGSG_05750
												FGSG_05882	3.88106	0.00116823	FGSG_01763	-13.0024	1.84e-23	FGSG_04922	FGSG_09364
												FGSG_11168	3.86844	0.0112689				FGSG_11249	FGSG_08601
												FGSG_13700	3.86407	0.00667147				FGSG_03598	FGSG_07503
												FGSG_11299	3.85129	0.00521897				FGSG_03628	FGSG_04207
												FGSG_03746	3.85048	0.00476372				FGSG_11495	FGSG_06888
												FGSG_02875	3.83484	6.22e-05				FGSG_11079	FGSG_08669
												FGSG_07866	3.81802	1.3e-05				FGSG_11304	FGSG_09625
												FGSG_07082	3.81654	0.04313				FGSG_10543	FGSG_05146
												FGSG_04922	3.78022	1.71e-07				FGSG_06497	FGSG_08816
												FGSG_02434	3.77958	0.00742611				FGSG_03340	FGSG_08587
												FGSG_04334	3.77872	0.00921376				FGSG_00563	FGSG_03846
												FGSG_00964	3.76773	0.0447556				FGSG_06328	FGSG_10969
												FGSG_03904	3.76532	0.0388053				FGSG_02059	FGSG_00196
												FGSG_04527	3.74394	0.00397903				FGSG_11298	FGSG_10296
												FGSG_05590	3.72423	0.00376115				FGSG_11049	FGSG_02675
												FGSG_02978	3.72337	0.0239933				FGSG_10279	FGSG_00852
												FGSG_07052	3.71952	0.0133961				FGSG_09291	FGSG_05375
												FGSG_12858	3.70608	0.00828473				FGSG_07625	FGSG_02420
												FGSG_09493	3.69828	2.6e-12				FGSG_03747	FGSG_11385
												FGSG_02147	3.68527	0.0413219				FGSG_10424	FGSG_06307
												FGSG_09462	3.66516	0.000311485				FGSG_08609	FGSG_13090
												FGSG_02866	3.62564	2.94e-05				FGSG_10746	FGSG_00470
												FGSG_12666	3.59617	1.69e-06				FGSG_02632	FGSG_07251
												FGSG_06993	3.58939	6.95e-05				FGSG_04293	FGSG_02730
												FGSG_07631	3.5853	1.79e-16				FGSG_08851	FGSG_13378
												FGSG_05720	3.56931	7.27e-05				FGSG_02360	FGSG_01916
												FGSG_10424	3.53697	5.83e-06				FGSG_05371	FGSG_07832
												FGSG_08610	3.53526	0.0315216				FGSG_00765	FGSG_09162
												FGSG_01594	3.48294	0.00230112				FGSG_11396	FGSG_02207
												FGSG_03787	3.47645	8.11e-05				FGSG_03247	FGSG_02379
												FGSG_04876	3.46127	1.15e-09				FGSG_02866	FGSG_05654
												FGSG_04985	3.45388	0.0270405				FGSG_09373	FGSG_04543
												FGSG_00318	3.44662	0.0428019				FGSG_03163	FGSG_08799
												FGSG_10224	3.42705	2.48e-05				FGSG_03049	FGSG_08924
												FGSG_14015	3.38312	0.000564788				FGSG_11305	FGSG_10007
												FGSG_05919	3.35517	0.0372894				FGSG_10206	FGSG_12767
												FGSG_04872	3.34345	0.000152789				FGSG_09896	FGSG_00742
												FGSG_06452	3.32976	0.00153647				FGSG_09990	FGSG_00542
												FGSG_09812	3.31933	0.0371525				FGSG_02875	FGSG_12596
												FGSG_06590	3.29869	0.0371525				FGSG_01789	FGSG_09053
												FGSG_08680	3.27809	0.0283665				FGSG_02082	FGSG_00741
												FGSG_01789	3.25922	6.53e-05				FGSG_00515	FGSG_12409
												FGSG_00495	3.22891	0.0423337				FGSG_07793	FGSG_02820
												FGSG_08684	3.16453	1.54e-06				FGSG_06566	FGSG_04330
												FGSG_07274	3.1588	5.02e-10				FGSG_11169	FGSG_01193
												FGSG_03123	3.15149	0.000623567				FGSG_03336	FGSG_09567
												FGSG_05042	3.14807	0.0018751				FGSG_07543	FGSG_04958
												FGSG_09382	3.13867	5.5e-09				FGSG_08252	FGSG_04428
												FGSG_04994	3.11131	0.0012099				FGSG_03335	FGSG_09759
												FGSG_10974	3.10928	2.22e-05				FGSG_11190	FGSG_13056
												FGSG_01882	3.10871	8.58e-11				FGSG_13834	FGSG_03214
												FGSG_11298	3.09295	2.46e-06				FGSG_04872	FGSG_09547
												FGSG_06328	3.04745	2.24e-06				FGSG_03629	FGSG_01544
												FGSG_02516	3.04067	0.00234823				FGSG_12206	FGSG_11797
												FGSG_02163	2.97606	0.000799939				FGSG_11478	FGSG_03293
												FGSG_02560	2.97213	0.00583579				FGSG_04149	FGSG_13112
												FGSG_11472	2.94105	8.29e-14				FGSG_06575	FGSG_00790
												FGSG_03104	2.93203	0.0204235				FGSG_07908	FGSG_01356
												FGSG_06506	2.92827	4.75e-09				FGSG_06744	FGSG_09070
												FGSG_07625	2.90992	4.48e-06				FGSG_09462	FGSG_04529
												FGSG_01523	2.9087	1.38e-11				FGSG_03002	FGSG_08559
												FGSG_03529	2.90269	0.000639354				FGSG_07350	FGSG_10952
												FGSG_10156	2.89662	0.00630614				FGSG_05461	FGSG_04512
												FGSG_03632	2.86752	0.000225261				FGSG_06681	FGSG_11776
												FGSG_09896	2.85535	4.53e-05				FGSG_12166	FGSG_03728
												FGSG_06235	2.85135	0.0339053				FGSG_09353	FGSG_03015
												FGSG_08809	2.84958	1.76e-08				FGSG_08686	FGSG_03869
												FGSG_01833	2.84279	0.0200766				FGSG_01757	FGSG_02358
												FGSG_01832	2.82928	0.00789855				FGSG_05929
												FGSG_03624	2.8289	0.0126854				FGSG_11037
												FGSG_06784	2.82636	1.49e-09				FGSG_03406
												FGSG_08695	2.80658	0.0185419				FGSG_11348
												FGSG_01026	2.79887	8.94e-09				FGSG_02920
												FGSG_02920	2.77217	0.000473452				FGSG_09886
												FGSG_13979	2.76884	0.0158102				FGSG_03795
												FGSG_08196	2.754	0.0423337				FGSG_06613
												FGSG_10855	2.75019	3.23e-07				FGSG_06017
												FGSG_11300	2.7462	0.00210552				FGSG_11027
												FGSG_04431	2.74045	0.019951				FGSG_03529
												FGSG_03494	2.73399	0.00841907				FGSG_00288
												FGSG_05164	2.71406	0.00647682				FGSG_04333
												FGSG_09093	2.69821	0.00306594				FGSG_12821
												FGSG_13689	2.6886	0.00767251				FGSG_03436
												FGSG_03715	2.64326	0.000765785				FGSG_08620
												FGSG_07775	2.62389	0.00595201				FGSG_00301
												FGSG_03462	2.62113	0.0298342				FGSG_03124
												FGSG_08266	2.60865	0.00654007				FGSG_12534
												FGSG_02070	2.60762	0.018341				FGSG_13718
												FGSG_05052	2.60038	0.0159832				FGSG_11618
												FGSG_04333	2.59594	0.000650995				FGSG_03883
												FGSG_08546	2.59114	0.0125868				FGSG_00917
												FGSG_02087	2.59069	5.19e-09				FGSG_02163
												FGSG_08352	2.57127	0.0289253				FGSG_00657
												FGSG_09266	2.56051	3.67e-05				FGSG_03911
												FGSG_00917	2.55662	0.000795399				FGSG_00184
												FGSG_04936	2.55338	0.011205				FGSG_06545
												FGSG_08270	2.5332	0.0127141				FGSG_03638
												FGSG_00515	2.51348	7e-05				FGSG_11208
												FGSG_01580	2.49641	0.00301687				FGSG_01461
												FGSG_04452	2.48808	8.79e-06				FGSG_01169
												FGSG_07457	2.47609	0.0223889				FGSG_04234
												FGSG_06127	2.46684	0.0023766				FGSG_11114
												FGSG_02467	2.4646	0.0180392				FGSG_13536
												FGSG_08312	2.45235	5.47e-08				FGSG_00209
												FGSG_09795	2.43364	0.043594				FGSG_06918
												FGSG_10207	2.42802	0.00711573				FGSG_02681
												FGSG_06918	2.36071	0.00114365				FGSG_05882
												FGSG_07543	2.33503	9.18e-05				FGSG_04994
												FGSG_05594	2.3349	3.14e-10				FGSG_01177
												FGSG_06681	2.32799	0.000329094				FGSG_08571
												FGSG_04390	2.28783	0.0488191				FGSG_04580
												FGSG_07224	2.26817	0.00721914				FGSG_05747
												FGSG_02851	2.23408	0.0337815				FGSG_07695
												FGSG_06397	2.23087	0.00269792				FGSG_00642
												FGSG_05929	2.22558	0.000447877				FGSG_11411
												FGSG_06566	2.21572	7.21e-05				FGSG_03248
												FGSG_05371	2.20191	1.68e-05				FGSG_02783
												FGSG_05507	2.19323	0.00485475				FGSG_11366
												FGSG_06744	2.17232	0.000311485				FGSG_01872
												FGSG_03745	2.1045	6.68e-08				FGSG_03922
												FGSG_10025	2.09973	0.0353229				FGSG_11300
												FGSG_02839	2.09304	4.85e-09				FGSG_09739
												FGSG_03662	2.04208	8.85e-05				FGSG_11112
												FGSG_05908	2.02157	0.0459205				FGSG_12573
												FGSG_20079	1.99594	0.00159622				FGSG_09830
												FGSG_09955	1.97017	1.22e-07				FGSG_07137
												FGSG_03638	1.96887	0.000950498				FGSG_01594
												FGSG_06466	1.96277	0.0399895				FGSG_03175
												FGSG_02069	1.95891	0.0175007				FGSG_02516
												FGSG_09475	1.93209	0.0115924				FGSG_04560
												FGSG_00720	1.92454	0.0209717				FGSG_09521
												FGSG_20083	1.90478	8.31e-05				FGSG_06397
												FGSG_01177	1.90441	0.00128831				FGSG_04575
												FGSG_02204	1.88536	0.0116578				FGSG_04615
												FGSG_12934	1.88517	0.0157439				FGSG_07108
												FGSG_09205	1.86629	8.89e-08				FGSG_11568
												FGSG_06651	1.86518	0.00528411				FGSG_12648
												FGSG_20058	1.8324	2.3e-05				FGSG_01580
												FGSG_08579	1.83008	0.0139672				FGSG_08391
												FGSG_04560	1.8289	0.00236692				FGSG_07794
												FGSG_03148	1.81226	0.00109662				FGSG_09093
												FGSG_09304	1.81026	0.0112689				FGSG_12282
												FGSG_11618	1.81007	0.000746779				FGSG_08121
												FGSG_07863	1.80988	2.17e-09				FGSG_03770
												FGSG_00330	1.79164	0.00547025				FGSG_09398
												FGSG_09722	1.78505	0.00281402				FGSG_06612
												FGSG_13000	1.77449	1.55e-08				FGSG_02252
												FGSG_09197	1.77218	0.00581769				FGSG_02578
												FGSG_01872	1.76812	0.00185134				FGSG_13240
												FGSG_09830	1.76473	0.00222526				FGSG_13300
												FGSG_20052	1.74891	0.00135232				FGSG_03725
												FGSG_01866	1.73233	0.0233222				FGSG_05590
												FGSG_11794	1.72501	0.0380544				FGSG_07483
												FGSG_08459	1.72252	0.00763325				FGSG_04527
												FGSG_20056	1.71361	0.000250525				FGSG_04603
												FGSG_07838	1.69877	0.044662				FGSG_00775
												FGSG_06188	1.69266	0.00419871				FGSG_08422
												FGSG_13881	1.6883	0.0175007				FGSG_04932
												FGSG_03743	1.68356	0.0494189				FGSG_06188
												FGSG_09854	1.67411	0.00954425				FGSG_10157
												FGSG_20047	1.66935	0.00251097				FGSG_10243
												FGSG_20084	1.66909	0.023872				FGSG_03191
												FGSG_09418	1.66704	0.0420843				FGSG_00260
												FGSG_20074	1.66262	0.0035609				FGSG_05080
												FGSG_02077	1.65435	9.87e-05				FGSG_11066
												FGSG_06794	1.65405	0.0382868				FGSG_03746
												FGSG_10157	1.65359	0.00426819				FGSG_03157
												FGSG_07131	1.65279	0.015345				FGSG_05507
												FGSG_20054	1.64196	0.000519006				FGSG_07299
												FGSG_04911	1.63723	0.0376246				FGSG_00623
												FGSG_13540	1.63557	0.0379588				FGSG_13856
												FGSG_07478	1.62157	0.0120754				FGSG_05865
												FGSG_09990	1.61938	5.45e-05				FGSG_06236
												FGSG_06605	1.61586	0.0446618				FGSG_11299
												FGSG_05942	1.61309	0.0435356				FGSG_03180
												FGSG_03378	1.61252	0.0060394				FGSG_06651
												FGSG_20049	1.60406	0.00109662				FGSG_05660
												FGSG_06866	1.5876	0.00749893				FGSG_04735
												FGSG_08700	1.57634	0.01457				FGSG_05324
												FGSG_09476	1.57267	0.0323817				FGSG_11367
												FGSG_09321	1.54413	1.05e-05				FGSG_01988
												FGSG_11487	1.53846	0.0221961				FGSG_01208
												FGSG_08571	1.51976	0.00144842				FGSG_09197
												FGSG_03379	1.51796	0.0291831				FGSG_02560
												FGSG_09739	1.51727	0.0022118				FGSG_06016
												FGSG_10077	1.51518	0.0458233				FGSG_11080
												FGSG_10746	1.51315	8.3e-06				FGSG_03378
												FGSG_06575	1.49548	0.000254895				FGSG_11033
												FGSG_04735	1.49186	0.00549018				FGSG_06618
												FGSG_00979	1.49041	3.14e-10				FGSG_05164
												FGSG_08844	1.48755	0.0331045				FGSG_08266
												FGSG_08620	1.47945	0.000707044				FGSG_13700
												FGSG_07414	1.47656	0.0437144				FGSG_10011
												FGSG_10598	1.46715	0.0141213				FGSG_11339
												FGSG_01330	1.45578	0.0278909				FGSG_03448
												FGSG_00642	1.45372	0.00165853				FGSG_07309
												FGSG_20050	1.45307	0.0301271				FGSG_10207
												FGSG_12179	1.44016	0.0345317				FGSG_01819
												FGSG_02240	1.42422	0.0297452				FGSG_07080
												FGSG_09956	1.41508	0.045083				FGSG_07224
												FGSG_13111	1.39895	0.0193241				FGSG_02434
												FGSG_01228	1.39774	0.0279066				FGSG_12764
												FGSG_12669	1.39412	0.0450807				FGSG_06504
												FGSG_09960	1.393	0.00905102				FGSG_06866
												FGSG_02783	1.39022	0.0018189				FGSG_06671
												FGSG_08851	1.37394	1.02e-05				FGSG_09325
												FGSG_03180	1.35712	0.00522406				FGSG_01918
												FGSG_07067	1.35298	0.0256253				FGSG_13689
												FGSG_02025	1.2924	0.00199266				FGSG_01466
												FGSG_06805	1.27337	0.0118977				FGSG_11081
												FGSG_12937	1.2558	0.00487275				FGSG_10631
												FGSG_05409	1.23706	0.0244484				FGSG_01832
												FGSG_09555	1.21693	0.0297452				FGSG_04732
												FGSG_08677	1.2169	0.0315342				FGSG_10119
												FGSG_03466	1.21556	0.00962501				FGSG_12858
												FGSG_06701	1.19176	0.0265475				FGSG_10113
												FGSG_04130	1.19092	0.0407245				FGSG_02440
												FGSG_07315	1.17725	0.0270405				FGSG_11228
												FGSG_03744	1.16272	0.0409232				FGSG_09960
												FGSG_06313	1.14787	0.0255711				FGSG_06569
												FGSG_11878	1.13355	0.0356355				FGSG_02975
												FGSG_05279	1.10824	0.0411685				FGSG_04334
												FGSG_04149	1.09363	0.000250525				FGSG_02698
												FGSG_05385	1.08222	0.0182299				FGSG_09854
												FGSG_02542	1.07215	0.00101143				FGSG_07665
												FGSG_05593	1.06369	0.0419528				FGSG_13134
												FGSG_01547	1.06078	0.0381395				FGSG_04936
												FGSG_06315	1.04546	0.0147963				FGSG_09267
												FGSG_01188	1.00363	0.0420593				FGSG_11168
												FGSG_10001	1.00138	0.0206483				FGSG_09475
																		FGSG_04528
																		FGSG_02204
																		FGSG_06805
																		FGSG_03813
																		FGSG_12415
																		FGSG_08546
																		FGSG_03624
																		FGSG_08270
																		FGSG_01491
																		FGSG_12851
																		FGSG_09821
																		FGSG_06812
																		FGSG_05523
																		FGSG_07052
																		FGSG_09052
																		FGSG_08579
																		FGSG_10598
																		FGSG_08700
																		FGSG_02155
																		FGSG_06315
																		FGSG_09354
																		FGSG_05683
																		FGSG_11183
																		FGSG_07131
																		FGSG_12934
																		FGSG_07639
																		FGSG_06440
																		FGSG_13979
																		FGSG_05052
																		FGSG_01980
																		FGSG_13881
																		FGSG_02069
																		FGSG_05385
																		FGSG_00604
																		FGSG_02070
																		FGSG_08695
																		FGSG_09136
																		FGSG_07772
																		FGSG_13111
																		FGSG_03199
																		FGSG_12605
																		FGSG_07275
																		FGSG_06537
																		FGSG_06972
																		FGSG_01633
																		FGSG_04431
																		FGSG_01833
																		FGSG_03104
																		FGSG_06261
																		FGSG_10001
																		FGSG_12016
																		FGSG_00720
																		FGSG_02169
																		FGSG_13575
																		FGSG_11487
																		FGSG_07457
																		FGSG_03149
																		FGSG_01603
																		FGSG_11428
																		FGSG_02978
																		FGSG_05409
																		FGSG_10326
																		FGSG_06313
																		FGSG_07067
																		FGSG_09563
																		FGSG_06701
																		FGSG_07315
																		FGSG_04985
																		FGSG_01330
																		FGSG_01228
																		FGSG_05933
																		FGSG_08680
																		FGSG_08352
																		FGSG_03379
																		FGSG_09555
																		FGSG_02240
																		FGSG_03462
																		FGSG_03600
																		FGSG_11254
																		FGSG_07130
																		FGSG_08610
																		FGSG_04151
																		FGSG_08677
																		FGSG_11811
																		FGSG_10065
																		FGSG_09476
																		FGSG_12111
																		FGSG_02851
																		FGSG_12179
																		FGSG_09404
																		FGSG_10025
																		FGSG_06590
																		FGSG_09812
																		FGSG_05919
																		FGSG_04911
																		FGSG_13540
																		FGSG_11794
																		FGSG_01547
																		FGSG_06794
																		FGSG_03904
																		FGSG_13938
																		FGSG_06466
																		FGSG_03744
																		FGSG_05279
																		FGSG_02147
																		FGSG_05593
																		FGSG_01188
																		FGSG_09418
																		FGSG_00495
																		FGSG_08196
																		FGSG_03526
																		FGSG_00318
																		FGSG_13616
																		FGSG_07082
																		FGSG_09795
																		FGSG_07414
																		FGSG_06605
																		FGSG_07838
																		FGSG_00964
																		FGSG_12669
																		FGSG_09956
																		FGSG_10077
																		FGSG_05908
																		FGSG_04390
																		FGSG_03743

## Sheet: Up DEGs GO(FL)
	Gene ontology(GO) enrichment analysis of total upregulated DEGs in Fielder
Gene list	ID	Name	Bgd count	Result count	Result gene list	Pct of bgd	Fold enrichment	Odds ratio	P-value	Benjamini	Bonferroni
FGSG_03002	GO:0005975	carbohydrate metabolic process	348	37	FGRAMPH1_01G03057,FGRAMPH1_01G03723,FGRAMPH1_01G03899,FGRAMPH1_01G04967,FGRAMPH1_01G05905,FGRAMPH1_01G06317,FGRAMPH1_01G06785,FGRAMPH1_01G08045,FGRAMPH1_01G10605,FGRAMPH1_01G11251,FGRAMPH1_01G11619,FGRAMPH1_01G11821,FGRAMPH1_01G11823,FGRAMPH1_01G11933,FGRAMPH1_01G12417,FGRAMPH1_01G12467,FGRAMPH1_01G12655,FGRAMPH1_01G12939,FGRAMPH1_01G13095,FGRAMPH1_01G13999,FGRAMPH1_01G18907,FGRAMPH1_01G19389,FGR…	10.6	3.27	3.92	1.27677e-10	9.19276e-08	9.19276e-08
FGSG_13866	GO:0055114	obsolete oxidation-reduction process	895	63	FGRAMPH1_01G00053,FGRAMPH1_01G00131,FGRAMPH1_01G00145,FGRAMPH1_01G00155,FGRAMPH1_01G00223,FGRAMPH1_01G00849,FGRAMPH1_01G01503,FGRAMPH1_01G01651,FGRAMPH1_01G02461,FGRAMPH1_01G03723,FGRAMPH1_01G04431,FGRAMPH1_01G05005,FGRAMPH1_01G05035,FGRAMPH1_01G05905,FGRAMPH1_01G06425,FGRAMPH1_01G06445,FGRAMPH1_01G06611,FGRAMPH1_01G07527,FGRAMPH1_01G07687,FGRAMPH1_01G07763,FGRAMPH1_01G07881,FGRAMPH1_01G08515,FGR…	7	2.17	2.61	1.60221e-09	5.76796e-07	1.15359e-06
FGSG_05720	GO:0008152	metabolic process	3697	159	FGRAMPH1_01G00053,FGRAMPH1_01G00131,FGRAMPH1_01G00145,FGRAMPH1_01G00155,FGRAMPH1_01G00223,FGRAMPH1_01G00461,FGRAMPH1_01G00849,FGRAMPH1_01G00867,FGRAMPH1_01G01503,FGRAMPH1_01G01633,FGRAMPH1_01G01651,FGRAMPH1_01G02091,FGRAMPH1_01G02103,FGRAMPH1_01G02461,FGRAMPH1_01G02733,FGRAMPH1_01G02925,FGRAMPH1_01G03057,FGRAMPH1_01G03209,FGRAMPH1_01G03723,FGRAMPH1_01G03831,FGRAMPH1_01G03899,FGRAMPH1_01G03917,FGR…	4.3	1.32	1.76	1.70349e-06	0.000408837	0.00122651
FGSG_09424	GO:0044262	cellular carbohydrate metabolic process	87	13	FGRAMPH1_01G03057,FGRAMPH1_01G03723,FGRAMPH1_01G06317,FGRAMPH1_01G06785,FGRAMPH1_01G10605,FGRAMPH1_01G11619,FGRAMPH1_01G12417,FGRAMPH1_01G12467,FGRAMPH1_01G12939,FGRAMPH1_01G21081,FGRAMPH1_01G22295,FGRAMPH1_01G25243,FGRAMPH1_01G27969,	14.9	4.6	5.43	4.05748e-06	0.000730346	0.00292138
FGSG_01593	GO:1901575	organic substance catabolic process	434	32	FGRAMPH1_01G00867,FGRAMPH1_01G03057,FGRAMPH1_01G06317,FGRAMPH1_01G06373,FGRAMPH1_01G07687,FGRAMPH1_01G08045,FGRAMPH1_01G09733,FGRAMPH1_01G09751,FGRAMPH1_01G11821,FGRAMPH1_01G11995,FGRAMPH1_01G12417,FGRAMPH1_01G12467,FGRAMPH1_01G12667,FGRAMPH1_01G12827,FGRAMPH1_01G12939,FGRAMPH1_01G19115,FGRAMPH1_01G19243,FGRAMPH1_01G19389,FGRAMPH1_01G19545,FGRAMPH1_01G19927,FGRAMPH1_01G20357,FGRAMPH1_01G20441,FGR…	7.4	2.27	2.54	1.09212e-05	0.00157266	0.00786329
FGSG_03003	GO:0044281	small molecule metabolic process	634	41	FGRAMPH1_01G00131,FGRAMPH1_01G00867,FGRAMPH1_01G02461,FGRAMPH1_01G02925,FGRAMPH1_01G03209,FGRAMPH1_01G03723,FGRAMPH1_01G03831,FGRAMPH1_01G04271,FGRAMPH1_01G05905,FGRAMPH1_01G06373,FGRAMPH1_01G06785,FGRAMPH1_01G07333,FGRAMPH1_01G07527,FGRAMPH1_01G07687,FGRAMPH1_01G07881,FGRAMPH1_01G09513,FGRAMPH1_01G09731,FGRAMPH1_01G09733,FGRAMPH1_01G09751,FGRAMPH1_01G10605,FGRAMPH1_01G11303,FGRAMPH1_01G11995,FGR…	6.5	1.99	2.24	1.50172e-05	0.00180206	0.0108124
FGSG_11037	GO:0016052	carbohydrate catabolic process	151	16	FGRAMPH1_01G03057,FGRAMPH1_01G06317,FGRAMPH1_01G08045,FGRAMPH1_01G11821,FGRAMPH1_01G12417,FGRAMPH1_01G12467,FGRAMPH1_01G12939,FGRAMPH1_01G19389,FGRAMPH1_01G19927,FGRAMPH1_01G21081,FGRAMPH1_01G21085,FGRAMPH1_01G22295,FGRAMPH1_01G22335,FGRAMPH1_01G25059,FGRAMPH1_01G25243,FGRAMPH1_01G27969,	10.6	3.26	3.68	2.9852e-05	0.00305628	0.0214934
FGSG_02063	GO:0031222	arabinan catabolic process	3	3	FGRAMPH1_01G11821,FGRAMPH1_01G22335,FGRAMPH1_01G25059,	100	30.78	inf	3.39587e-05	0.00305628	0.0244503
FGSG_05839	GO:0009313	oligosaccharide catabolic process	8	4	FGRAMPH1_01G03057,FGRAMPH1_01G12467,FGRAMPH1_01G12939,FGRAMPH1_01G27969,	50	15.39	30.19	6.89194e-05	0.00544035	0.049622
FGSG_02125	GO:0009056	catabolic process	480	32	FGRAMPH1_01G00867,FGRAMPH1_01G03057,FGRAMPH1_01G06317,FGRAMPH1_01G06373,FGRAMPH1_01G07687,FGRAMPH1_01G08045,FGRAMPH1_01G09733,FGRAMPH1_01G09751,FGRAMPH1_01G11821,FGRAMPH1_01G11995,FGRAMPH1_01G12417,FGRAMPH1_01G12467,FGRAMPH1_01G12667,FGRAMPH1_01G12827,FGRAMPH1_01G12939,FGRAMPH1_01G19115,FGRAMPH1_01G19243,FGRAMPH1_01G19389,FGRAMPH1_01G19545,FGRAMPH1_01G19927,FGRAMPH1_01G20357,FGRAMPH1_01G20441,FGR…	6.7	2.05	2.27	7.98358e-05	0.00544035	0.0574818
FGSG_13718	GO:0006082	organic acid metabolic process	375	27	FGRAMPH1_01G00131,FGRAMPH1_01G00867,FGRAMPH1_01G02461,FGRAMPH1_01G02925,FGRAMPH1_01G03209,FGRAMPH1_01G03831,FGRAMPH1_01G05905,FGRAMPH1_01G06373,FGRAMPH1_01G06785,FGRAMPH1_01G07333,FGRAMPH1_01G07687,FGRAMPH1_01G07881,FGRAMPH1_01G09513,FGRAMPH1_01G09731,FGRAMPH1_01G09733,FGRAMPH1_01G09751,FGRAMPH1_01G10605,FGRAMPH1_01G11995,FGRAMPH1_01G19545,FGRAMPH1_01G20357,FGRAMPH1_01G20959,FGRAMPH1_01G21249,FGR…	7.2	2.22	2.45	8.31164e-05	0.00544035	0.0598438
FGSG_10746	GO:0031221	arabinan metabolic process	4	3	FGRAMPH1_01G11821,FGRAMPH1_01G22335,FGRAMPH1_01G25059,	75	23.08	90.27	0.000132558	0.00795349	0.0954419
FGSG_04872	GO:0000272	polysaccharide catabolic process	90	11	FGRAMPH1_01G06317,FGRAMPH1_01G08045,FGRAMPH1_01G11821,FGRAMPH1_01G12939,FGRAMPH1_01G19927,FGRAMPH1_01G21081,FGRAMPH1_01G21085,FGRAMPH1_01G22295,FGRAMPH1_01G22335,FGRAMPH1_01G25059,FGRAMPH1_01G25243,	12.2	3.76	4.27	0.000149165	0.00826146	0.107399
FGSG_03744	GO:0044282	small molecule catabolic process	108	12	FGRAMPH1_01G06373,FGRAMPH1_01G07687,FGRAMPH1_01G09733,FGRAMPH1_01G09751,FGRAMPH1_01G11995,FGRAMPH1_01G12417,FGRAMPH1_01G19389,FGRAMPH1_01G19545,FGRAMPH1_01G20357,FGRAMPH1_01G20441,FGRAMPH1_01G22905,FGRAMPH1_01G27589,	11.1	3.42	3.84	0.000189145	0.00942422	0.136184
FGSG_05551	GO:0006081	cellular aldehyde metabolic process	10	4	FGRAMPH1_01G06785,FGRAMPH1_01G10605,FGRAMPH1_01G20441,FGRAMPH1_01G22905,	40	12.31	20.12	0.000196338	0.00942422	0.141363
FGSG_02875	GO:0005976	polysaccharide metabolic process	112	12	FGRAMPH1_01G06317,FGRAMPH1_01G08045,FGRAMPH1_01G11619,FGRAMPH1_01G11821,FGRAMPH1_01G12939,FGRAMPH1_01G19927,FGRAMPH1_01G21081,FGRAMPH1_01G21085,FGRAMPH1_01G22295,FGRAMPH1_01G22335,FGRAMPH1_01G25059,FGRAMPH1_01G25243,	10.7	3.3	3.69	0.000266913	0.0120111	0.192177
FGSG_01603	GO:0046373	L-arabinose metabolic process	5	3	FGRAMPH1_01G22335,FGRAMPH1_01G25059,FGRAMPH1_01G25243,	60	18.47	45.13	0.000323414	0.0136975	0.232858
FGSG_03049	GO:0044248	cellular catabolic process	337	23	FGRAMPH1_01G00867,FGRAMPH1_01G03057,FGRAMPH1_01G06317,FGRAMPH1_01G06373,FGRAMPH1_01G07687,FGRAMPH1_01G09733,FGRAMPH1_01G09751,FGRAMPH1_01G11995,FGRAMPH1_01G12417,FGRAMPH1_01G12467,FGRAMPH1_01G12667,FGRAMPH1_01G12939,FGRAMPH1_01G19243,FGRAMPH1_01G19545,FGRAMPH1_01G20357,FGRAMPH1_01G20441,FGRAMPH1_01G21081,FGRAMPH1_01G22295,FGRAMPH1_01G22905,FGRAMPH1_01G25243,FGRAMPH1_01G27589,FGRAMPH1_01G27831,FGR…	6.8	2.1	2.28	0.000603091	0.0227259	0.434226
FGSG_00007	GO:0010383	cell wall polysaccharide metabolic process	13	4	FGRAMPH1_01G11619,FGRAMPH1_01G21081,FGRAMPH1_01G22295,FGRAMPH1_01G25243,	30.8	9.47	13.41	0.000618718	0.0227259	0.445477
FGSG_02145	GO:0019566	arabinose metabolic process	6	3	FGRAMPH1_01G22335,FGRAMPH1_01G25059,FGRAMPH1_01G25243,	50	15.39	30.08	0.000631274	0.0227259	0.454517
FGSG_09598	GO:1901605	alpha-amino acid metabolic process	160	14	FGRAMPH1_01G02925,FGRAMPH1_01G03831,FGRAMPH1_01G06373,FGRAMPH1_01G07333,FGRAMPH1_01G07687,FGRAMPH1_01G09731,FGRAMPH1_01G09733,FGRAMPH1_01G09751,FGRAMPH1_01G11995,FGRAMPH1_01G20357,FGRAMPH1_01G20959,FGRAMPH1_01G21959,FGRAMPH1_01G21961,FGRAMPH1_01G26395,	8.8	2.69	2.95	0.000693031	0.0227721	0.498982
FGSG_00801	GO:0019752	carboxylic acid metabolic process	362	24	FGRAMPH1_01G00131,FGRAMPH1_01G00867,FGRAMPH1_01G02925,FGRAMPH1_01G03831,FGRAMPH1_01G05905,FGRAMPH1_01G06373,FGRAMPH1_01G06785,FGRAMPH1_01G07333,FGRAMPH1_01G07687,FGRAMPH1_01G07881,FGRAMPH1_01G09513,FGRAMPH1_01G09731,FGRAMPH1_01G09733,FGRAMPH1_01G09751,FGRAMPH1_01G10605,FGRAMPH1_01G11995,FGRAMPH1_01G19545,FGRAMPH1_01G20357,FGRAMPH1_01G20959,FGRAMPH1_01G21249,FGRAMPH1_01G21959,FGRAMPH1_01G21961,FGR…	6.6	2.04	2.22	0.000695813	0.0227721	0.500986
FGSG_00048	GO:0043436	oxoacid metabolic process	367	24	FGRAMPH1_01G00131,FGRAMPH1_01G00867,FGRAMPH1_01G02925,FGRAMPH1_01G03831,FGRAMPH1_01G05905,FGRAMPH1_01G06373,FGRAMPH1_01G06785,FGRAMPH1_01G07333,FGRAMPH1_01G07687,FGRAMPH1_01G07881,FGRAMPH1_01G09513,FGRAMPH1_01G09731,FGRAMPH1_01G09733,FGRAMPH1_01G09751,FGRAMPH1_01G10605,FGRAMPH1_01G11995,FGRAMPH1_01G19545,FGRAMPH1_01G20357,FGRAMPH1_01G20959,FGRAMPH1_01G21249,FGRAMPH1_01G21959,FGRAMPH1_01G21961,FGR…	6.5	2.01	2.18	0.000844036	0.0228326	0.607706
FGSG_04283	GO:0046294	formaldehyde catabolic process	2	2	FGRAMPH1_01G20441,FGRAMPH1_01G22905,	100	30.78	inf	0.00105224	0.0228326	0.757612
FGSG_07458	GO:0046292	formaldehyde metabolic process	2	2	FGRAMPH1_01G20441,FGRAMPH1_01G22905,	100	30.78	inf	0.00105224	0.0228326	0.757612
FGSG_05328	GO:0046246	terpene biosynthetic process	2	2	FGRAMPH1_01G00053,FGRAMPH1_01G07999,	100	30.78	inf	0.00105224	0.0228326	0.757612
FGSG_03894	GO:0110095	cellular detoxification of aldehyde	2	2	FGRAMPH1_01G20441,FGRAMPH1_01G22905,	100	30.78	inf	0.00105224	0.0228326	0.757612
FGSG_10993	GO:0042214	terpene metabolic process	2	2	FGRAMPH1_01G00053,FGRAMPH1_01G07999,	100	30.78	inf	0.00105224	0.0228326	0.757612
FGSG_14018	GO:0051762	sesquiterpene biosynthetic process	2	2	FGRAMPH1_01G00053,FGRAMPH1_01G07999,	100	30.78	inf	0.00105224	0.0228326	0.757612
FGSG_10119	GO:0110096	cellular response to aldehyde	2	2	FGRAMPH1_01G20441,FGRAMPH1_01G22905,	100	30.78	inf	0.00105224	0.0228326	0.757612
FGSG_12519	GO:0120252	hydrocarbon metabolic process	2	2	FGRAMPH1_01G00053,FGRAMPH1_01G07999,	100	30.78	inf	0.00105224	0.0228326	0.757612
FGSG_10220	GO:0120251	hydrocarbon biosynthetic process	2	2	FGRAMPH1_01G00053,FGRAMPH1_01G07999,	100	30.78	inf	0.00105224	0.0228326	0.757612
FGSG_11883	GO:0051761	sesquiterpene metabolic process	2	2	FGRAMPH1_01G00053,FGRAMPH1_01G07999,	100	30.78	inf	0.00105224	0.0228326	0.757612
FGSG_01095	GO:0046352	disaccharide catabolic process	7	3	FGRAMPH1_01G03057,FGRAMPH1_01G12467,FGRAMPH1_01G27969,	42.9	13.19	22.56	0.00107821	0.0228326	0.776309
FGSG_01818	GO:0009311	oligosaccharide metabolic process	15	4	FGRAMPH1_01G03057,FGRAMPH1_01G12467,FGRAMPH1_01G12939,FGRAMPH1_01G27969,	26.7	8.21	10.97	0.00112197	0.0230805	0.807817
FGSG_08907	GO:0044275	cellular carbohydrate catabolic process	39	6	FGRAMPH1_01G03057,FGRAMPH1_01G06317,FGRAMPH1_01G12417,FGRAMPH1_01G12467,FGRAMPH1_01G12939,FGRAMPH1_01G27969,	15.4	4.73	5.51	0.0014756	0.029512	1
FGSG_04560	GO:1901700	response to oxygen-containing compound	27	5	FGRAMPH1_01G12417,FGRAMPH1_01G20441,FGRAMPH1_01G22905,FGRAMPH1_01G27589,FGRAMPH1_01G27831,	18.5	5.7	6.87	0.00156814	0.0305152	1
FGSG_11048	GO:0044036	cell wall macromolecule metabolic process	17	4	FGRAMPH1_01G11619,FGRAMPH1_01G21081,FGRAMPH1_01G22295,FGRAMPH1_01G25243,	23.5	7.24	9.28	0.00185838	0.0352114	1
FGSG_09526	GO:0044264	cellular polysaccharide metabolic process	41	6	FGRAMPH1_01G06317,FGRAMPH1_01G11619,FGRAMPH1_01G12939,FGRAMPH1_01G21081,FGRAMPH1_01G22295,FGRAMPH1_01G25243,	14.6	4.5	5.19	0.0019261	0.0355589	1
FGSG_03731	GO:0006720	isoprenoid metabolic process	29	5	FGRAMPH1_01G00053,FGRAMPH1_01G03917,FGRAMPH1_01G07999,FGRAMPH1_01G13111,FGRAMPH1_01G23179,	17.2	5.31	6.3	0.00218757	0.0393763	1
FGSG_02070	GO:0009063	cellular amino acid catabolic process	57	7	FGRAMPH1_01G06373,FGRAMPH1_01G07687,FGRAMPH1_01G09733,FGRAMPH1_01G09751,FGRAMPH1_01G11995,FGRAMPH1_01G20357,FGRAMPH1_01G27589,	12.3	3.78	4.25	0.00233536	0.0410112	1
FGSG_08325	GO:1990748	cellular detoxification	3	2	FGRAMPH1_01G20441,FGRAMPH1_01G22905,	66.7	20.52	59.96	0.0030888	0.0485181	1
FGSG_10363	GO:0006097	glyoxylate cycle	3	2	FGRAMPH1_01G06785,FGRAMPH1_01G10605,	66.7	20.52	59.96	0.0030888	0.0485181	1
FGSG_01235	GO:0046185	aldehyde catabolic process	3	2	FGRAMPH1_01G20441,FGRAMPH1_01G22905,	66.7	20.52	59.96	0.0030888	0.0485181	1
FGSG_03175	GO:0097237	cellular response to toxic substance	3	2	FGRAMPH1_01G20441,FGRAMPH1_01G22905,	66.7	20.52	59.96	0.0030888	0.0485181	1
FGSG_11554	GO:0045491	xylan metabolic process	10	3	FGRAMPH1_01G21081,FGRAMPH1_01G22295,FGRAMPH1_01G25243,	30	9.23	12.89	0.00343761	0.0485181	1
FGSG_09610	GO:0019321	pentose metabolic process	10	3	FGRAMPH1_01G22335,FGRAMPH1_01G25059,FGRAMPH1_01G25243,	30	9.23	12.89	0.00343761	0.0485181	1
FGSG_00342	GO:0016998	cell wall macromolecule catabolic process	10	3	FGRAMPH1_01G21081,FGRAMPH1_01G22295,FGRAMPH1_01G25243,	30	9.23	12.89	0.00343761	0.0485181	1
FGSG_11036	GO:0045493	xylan catabolic process	10	3	FGRAMPH1_01G21081,FGRAMPH1_01G22295,FGRAMPH1_01G25243,	30	9.23	12.89	0.00343761	0.0485181	1
FGSG_10542	GO:0044347	cell wall polysaccharide catabolic process	10	3	FGRAMPH1_01G21081,FGRAMPH1_01G22295,FGRAMPH1_01G25243,	30	9.23	12.89	0.00343761	0.0485181	1
FGSG_13638	GO:0010410	hemicellulose metabolic process	10	3	FGRAMPH1_01G21081,FGRAMPH1_01G22295,FGRAMPH1_01G25243,	30	9.23	12.89	0.00343761	0.0485181	1
FGSG_09159	GO:1901606	alpha-amino acid catabolic process	46	6	FGRAMPH1_01G06373,FGRAMPH1_01G07687,FGRAMPH1_01G09733,FGRAMPH1_01G09751,FGRAMPH1_01G11995,FGRAMPH1_01G20357,	13	4.01	4.54	0.00350409	0.0485181	1
FGSG_05140	GO:0046395	carboxylic acid catabolic process	78	8	FGRAMPH1_01G06373,FGRAMPH1_01G07687,FGRAMPH1_01G09733,FGRAMPH1_01G09751,FGRAMPH1_01G11995,FGRAMPH1_01G19545,FGRAMPH1_01G20357,FGRAMPH1_01G27589,	10.3	3.16	3.47	0.00367797	0.0490396	1
FGSG_04970	GO:0016054	organic acid catabolic process	78	8	FGRAMPH1_01G06373,FGRAMPH1_01G07687,FGRAMPH1_01G09733,FGRAMPH1_01G09751,FGRAMPH1_01G11995,FGRAMPH1_01G19545,FGRAMPH1_01G20357,FGRAMPH1_01G27589,	10.3	3.16	3.47	0.00367797	0.0490396	1
FGSG_09122	GO:0006813	potassium ion transport	11	3	FGRAMPH1_01G03457,FGRAMPH1_01G09717,FGRAMPH1_01G12947,	27.3	8.39	11.27	0.00461396	0.0582816	1
FGSG_03123	GO:0005984	disaccharide metabolic process	11	3	FGRAMPH1_01G03057,FGRAMPH1_01G12467,FGRAMPH1_01G27969,	27.3	8.39	11.27	0.00461396	0.0582816	1
FGSG_04288	GO:0006544	glycine metabolic process	11	3	FGRAMPH1_01G07687,FGRAMPH1_01G09731,FGRAMPH1_01G09733,	27.3	8.39	11.27	0.00461396	0.0582816	1
FGSG_05371	GO:0008299	isoprenoid biosynthetic process	22	4	FGRAMPH1_01G00053,FGRAMPH1_01G07999,FGRAMPH1_01G13111,FGRAMPH1_01G23179,	18.2	5.6	6.7	0.0050265	0.0623979	1
FGSG_01833	GO:0009069	serine family amino acid metabolic process	36	5	FGRAMPH1_01G02925,FGRAMPH1_01G07333,FGRAMPH1_01G07687,FGRAMPH1_01G09731,FGRAMPH1_01G09733,	13.9	4.27	4.87	0.00577168	0.0640063	1
FGSG_06833	GO:1901615	organic hydroxy compound metabolic process	102	9	FGRAMPH1_01G03723,FGRAMPH1_01G07527,FGRAMPH1_01G07881,FGRAMPH1_01G11303,FGRAMPH1_01G12417,FGRAMPH1_01G12649,FGRAMPH1_01G12667,FGRAMPH1_01G16837,FGRAMPH1_01G23179,	8.8	2.72	2.94	0.00580616	0.0640063	1
FGSG_10386	GO:0006536	glutamate metabolic process	12	3	FGRAMPH1_01G03831,FGRAMPH1_01G20357,FGRAMPH1_01G26395,	25	7.69	10.02	0.00600544	0.0640063	1
FGSG_02869	GO:0005985	sucrose metabolic process	4	2	FGRAMPH1_01G03057,FGRAMPH1_01G27969,	50	15.39	29.98	0.00604504	0.0640063	1
FGSG_01960	GO:0005987	sucrose catabolic process	4	2	FGRAMPH1_01G03057,FGRAMPH1_01G27969,	50	15.39	29.98	0.00604504	0.0640063	1
FGSG_11113	GO:0007023	post-chaperonin tubulin folding pathway	4	2	FGRAMPH1_01G01301,FGRAMPH1_01G19381,	50	15.39	29.98	0.00604504	0.0640063	1
FGSG_03635	GO:0046487	glyoxylate metabolic process	4	2	FGRAMPH1_01G06785,FGRAMPH1_01G10605,	50	15.39	29.98	0.00604504	0.0640063	1
FGSG_04580	GO:0034765	regulation of ion transmembrane transport	4	2	FGRAMPH1_01G09717,FGRAMPH1_01G12947,	50	15.39	29.98	0.00604504	0.0640063	1
FGSG_10200	GO:0006083	acetate metabolic process	4	2	FGRAMPH1_01G00867,FGRAMPH1_01G09513,	50	15.39	29.98	0.00604504	0.0640063	1
FGSG_01594	GO:0034762	regulation of transmembrane transport	4	2	FGRAMPH1_01G09717,FGRAMPH1_01G12947,	50	15.39	29.98	0.00604504	0.0640063	1
FGSG_11550	GO:0006066	alcohol metabolic process	68	7	FGRAMPH1_01G03723,FGRAMPH1_01G07527,FGRAMPH1_01G07881,FGRAMPH1_01G11303,FGRAMPH1_01G12417,FGRAMPH1_01G16837,FGRAMPH1_01G23179,	10.3	3.17	3.48	0.0063293	0.0660448	1
FGSG_12705	GO:0006099	tricarboxylic acid cycle	26	4	FGRAMPH1_01G05905,FGRAMPH1_01G06785,FGRAMPH1_01G07881,FGRAMPH1_01G10605,	15.4	4.73	5.48	0.00927933	0.0950449	1
FGSG_06278	GO:0008150	biological process	5316	192	FGRAMPH1_01G00053,FGRAMPH1_01G00131,FGRAMPH1_01G00145,FGRAMPH1_01G00155,FGRAMPH1_01G00215,FGRAMPH1_01G00223,FGRAMPH1_01G00461,FGRAMPH1_01G00849,FGRAMPH1_01G00867,FGRAMPH1_01G01253,FGRAMPH1_01G01301,FGRAMPH1_01G01633,FGRAMPH1_01G01651,FGRAMPH1_01G02091,FGRAMPH1_01G02103,FGRAMPH1_01G02461,FGRAMPH1_01G02555,FGRAMPH1_01G02733,FGRAMPH1_01G02911,FGRAMPH1_01G02925,FGRAMPH1_01G03057,FGRAMPH1_01G03209,FGR…	3.6	1.11	1.35	0.00979943	0.0950449	1
FGSG_06127	GO:0006546	glycine catabolic process	5	2	FGRAMPH1_01G07687,FGRAMPH1_01G09733,	40	12.31	19.98	0.00985946	0.0950449	1
FGSG_00979	GO:0006531	aspartate metabolic process	5	2	FGRAMPH1_01G20357,FGRAMPH1_01G26395,	40	12.31	19.98	0.00985946	0.0950449	1
FGSG_10022	GO:1901701	cellular response to oxygen-containing compound	5	2	FGRAMPH1_01G20441,FGRAMPH1_01G22905,	40	12.31	19.98	0.00985946	0.0950449	1
FGSG_03349	GO:0009405	obsolete pathogenesis	92	8	FGRAMPH1_01G00053,FGRAMPH1_01G00145,FGRAMPH1_01G00155,FGRAMPH1_01G06785,FGRAMPH1_01G07999,FGRAMPH1_01G11725,FGRAMPH1_01G20959,FGRAMPH1_01G22295,	8.7	2.68	2.89	0.00990051	0.0950449	1
FGSG_08122	GO:0015980	energy derivation by oxidation of organic compounds	59	6	FGRAMPH1_01G00867,FGRAMPH1_01G02103,FGRAMPH1_01G05905,FGRAMPH1_01G06785,FGRAMPH1_01G07881,FGRAMPH1_01G10605,	10.2	3.13	3.42	0.0118766	0.112515	1
FGSG_03311	GO:0006520	cellular amino acid metabolic process	244	15	FGRAMPH1_01G02925,FGRAMPH1_01G03831,FGRAMPH1_01G06373,FGRAMPH1_01G07333,FGRAMPH1_01G07687,FGRAMPH1_01G09731,FGRAMPH1_01G09733,FGRAMPH1_01G09751,FGRAMPH1_01G11995,FGRAMPH1_01G20357,FGRAMPH1_01G20959,FGRAMPH1_01G21959,FGRAMPH1_01G21961,FGRAMPH1_01G26395,FGRAMPH1_01G27589,	6.1	1.89	2	0.0132636	0.124023	1
FGSG_02202	GO:0045333	cellular respiration	44	5	FGRAMPH1_01G02103,FGRAMPH1_01G05905,FGRAMPH1_01G06785,FGRAMPH1_01G07881,FGRAMPH1_01G10605,	11.4	3.5	3.87	0.0134766	0.124399	1
FGSG_12483	GO:0035999	tetrahydrofolate interconversion	6	2	FGRAMPH1_01G07687,FGRAMPH1_01G09731,	33.3	10.26	14.99	0.0144736	0.130262	1
FGSG_03054	GO:0043269	regulation of ion transport	6	2	FGRAMPH1_01G09717,FGRAMPH1_01G12947,	33.3	10.26	14.99	0.0144736	0.130262	1
FGSG_00043	GO:0008643	carbohydrate transport	63	6	FGRAMPH1_01G03893,FGRAMPH1_01G11725,FGRAMPH1_01G18593,FGRAMPH1_01G21067,FGRAMPH1_01G25061,FGRAMPH1_01G27971,	9.5	2.93	3.18	0.0160908	0.14175	1
FGSG_08376	GO:0043648	dicarboxylic acid metabolic process	46	5	FGRAMPH1_01G03831,FGRAMPH1_01G05905,FGRAMPH1_01G20357,FGRAMPH1_01G21249,FGRAMPH1_01G26395,	10.9	3.35	3.68	0.0161437	0.14175	1
FGSG_01177	GO:0006952	defense response	17	3	FGRAMPH1_01G19115,FGRAMPH1_01G21217,FGRAMPH1_01G27835,	17.6	5.43	6.44	0.0164648	0.142827	1
FGSG_04431	GO:0009066	aspartate family amino acid metabolic process	47	5	FGRAMPH1_01G20357,FGRAMPH1_01G20959,FGRAMPH1_01G21959,FGRAMPH1_01G21961,FGRAMPH1_01G26395,	10.6	3.27	3.59	0.0176001	0.150858	1
FGSG_03518	GO:0006085	acetyl-CoA biosynthetic process	7	2	FGRAMPH1_01G00867,FGRAMPH1_01G03209,	28.6	8.79	11.99	0.0198317	0.164865	1
FGSG_07543	GO:0098754	detoxification	7	2	FGRAMPH1_01G20441,FGRAMPH1_01G22905,	28.6	8.79	11.99	0.0198317	0.164865	1
FGSG_07625	GO:0055085	transmembrane transport	703	33	FGRAMPH1_01G00215,FGRAMPH1_01G03457,FGRAMPH1_01G03893,FGRAMPH1_01G04221,FGRAMPH1_01G04995,FGRAMPH1_01G05167,FGRAMPH1_01G05577,FGRAMPH1_01G05631,FGRAMPH1_01G08643,FGRAMPH1_01G09623,FGRAMPH1_01G11451,FGRAMPH1_01G11503,FGRAMPH1_01G11725,FGRAMPH1_01G11757,FGRAMPH1_01G11853,FGRAMPH1_01G12475,FGRAMPH1_01G12663,FGRAMPH1_01G13601,FGRAMPH1_01G14993,FGRAMPH1_01G15275,FGRAMPH1_01G15627,FGRAMPH1_01G16541,FGR…	4.7	1.44	1.53	0.0199211	0.164865	1
FGSG_05502	GO:0071554	cell wall organization or biogenesis	87	7	FGRAMPH1_01G03899,FGRAMPH1_01G11619,FGRAMPH1_01G12467,FGRAMPH1_01G19389,FGRAMPH1_01G21081,FGRAMPH1_01G22295,FGRAMPH1_01G25243,	8	2.48	2.65	0.0227309	0.18598	1
FGSG_06463	GO:0008645	hexose transmembrane transport	8	2	FGRAMPH1_01G03893,FGRAMPH1_01G11725,	25	7.69	9.99	0.025881	0.189123	1
FGSG_09896	GO:0015749	monosaccharide transmembrane transport	8	2	FGRAMPH1_01G03893,FGRAMPH1_01G11725,	25	7.69	9.99	0.025881	0.189123	1
FGSG_10855	GO:0035384	thioester biosynthetic process	8	2	FGRAMPH1_01G00867,FGRAMPH1_01G03209,	25	7.69	9.99	0.025881	0.189123	1
FGSG_00071	GO:0071616	acyl-CoA biosynthetic process	8	2	FGRAMPH1_01G00867,FGRAMPH1_01G03209,	25	7.69	9.99	0.025881	0.189123	1
FGSG_01580	GO:0009071	serine family amino acid catabolic process	8	2	FGRAMPH1_01G07687,FGRAMPH1_01G09733,	25	7.69	9.99	0.025881	0.189123	1
FGSG_11205	GO:0034219	carbohydrate transmembrane transport	8	2	FGRAMPH1_01G03893,FGRAMPH1_01G11725,	25	7.69	9.99	0.025881	0.189123	1
FGSG_11428	GO:0009067	aspartate family amino acid biosynthetic process	35	4	FGRAMPH1_01G20357,FGRAMPH1_01G20959,FGRAMPH1_01G21959,FGRAMPH1_01G21961,	11.4	3.52	3.88	0.0258972	0.189123	1
FGSG_00067	GO:0071704	organic substance metabolic process	2781	106	FGRAMPH1_01G00053,FGRAMPH1_01G00131,FGRAMPH1_01G00461,FGRAMPH1_01G00867,FGRAMPH1_01G01633,FGRAMPH1_01G02091,FGRAMPH1_01G02461,FGRAMPH1_01G02733,FGRAMPH1_01G02925,FGRAMPH1_01G03057,FGRAMPH1_01G03209,FGRAMPH1_01G03723,FGRAMPH1_01G03831,FGRAMPH1_01G03899,FGRAMPH1_01G03917,FGRAMPH1_01G04271,FGRAMPH1_01G04967,FGRAMPH1_01G05315,FGRAMPH1_01G05905,FGRAMPH1_01G06317,FGRAMPH1_01G06373,FGRAMPH1_01G06785,FGR…	3.8	1.17	1.29	0.0261806	0.189123	1
FGSG_02866	GO:0006091	generation of precursor metabolites and energy	91	7	FGRAMPH1_01G00867,FGRAMPH1_01G02103,FGRAMPH1_01G05905,FGRAMPH1_01G06785,FGRAMPH1_01G07527,FGRAMPH1_01G07881,FGRAMPH1_01G10605,	7.7	2.37	2.52	0.0282553	0.189123	1
FGSG_11249	GO:0005996	monosaccharide metabolic process	36	4	FGRAMPH1_01G19389,FGRAMPH1_01G22335,FGRAMPH1_01G25059,FGRAMPH1_01G25243,	11.1	3.42	3.76	0.0284129	0.189123	1
FGSG_07695	GO:0009064	glutamine family amino acid metabolic process	54	5	FGRAMPH1_01G03831,FGRAMPH1_01G11995,FGRAMPH1_01G20357,FGRAMPH1_01G21961,FGRAMPH1_01G26395,	9.3	2.85	3.07	0.0302474	0.189123	1
FGSG_11049	GO:0045471	response to ethanol	1	1	FGRAMPH1_01G12417,	100	30.78	inf	0.0324934	0.189123	1
FGSG_03883	GO:0046160	heme a metabolic process	1	1	FGRAMPH1_01G10755,	100	30.78	inf	0.0324934	0.189123	1
FGSG_01026	GO:0042541	hemoglobin biosynthetic process	1	1	FGRAMPH1_01G20341,	100	30.78	inf	0.0324934	0.189123	1
FGSG_01768	GO:0034316	negative regulation of Arp2/3 complex-mediated actin nucleation	1	1	FGRAMPH1_01G26307,	100	30.78	inf	0.0324934	0.189123	1
FGSG_03343	GO:0042183	formate catabolic process	1	1	FGRAMPH1_01G19545,	100	30.78	inf	0.0324934	0.189123	1
FGSG_02059	GO:0000023	maltose metabolic process	1	1	FGRAMPH1_01G27969,	100	30.78	inf	0.0324934	0.189123	1
FGSG_00655	GO:0019550	glutamate catabolic process to aspartate	1	1	FGRAMPH1_01G20357,	100	30.78	inf	0.0324934	0.189123	1
FGSG_11079	GO:0010039	response to iron ion	1	1	FGRAMPH1_01G16541,	100	30.78	inf	0.0324934	0.189123	1
FGSG_02632	GO:0036267	invasive filamentous growth	1	1	FGRAMPH1_01G19389,	100	30.78	inf	0.0324934	0.189123	1
FGSG_00590	GO:0034315	regulation of Arp2/3 complex-mediated actin nucleation	1	1	FGRAMPH1_01G26307,	100	30.78	inf	0.0324934	0.189123	1
FGSG_03585	GO:0042426	choline catabolic process	1	1	FGRAMPH1_01G12827,	100	30.78	inf	0.0324934	0.189123	1
FGSG_03365	GO:0006069	ethanol oxidation	1	1	FGRAMPH1_01G07527,	100	30.78	inf	0.0324934	0.189123	1
FGSG_02077	GO:0051126	negative regulation of actin nucleation	1	1	FGRAMPH1_01G26307,	100	30.78	inf	0.0324934	0.189123	1
FGSG_10212	GO:0006784	heme A biosynthetic process	1	1	FGRAMPH1_01G10755,	100	30.78	inf	0.0324934	0.189123	1
FGSG_03189	GO:0009439	cyanate metabolic process	1	1	FGRAMPH1_01G24869,	100	30.78	inf	0.0324934	0.189123	1
FGSG_11494	GO:0015942	formate metabolic process	1	1	FGRAMPH1_01G19545,	100	30.78	inf	0.0324934	0.189123	1
FGSG_08684	GO:0016203	muscle attachment	1	1	FGRAMPH1_01G05119,	100	30.78	inf	0.0324934	0.189123	1
FGSG_11097	GO:0006532	aspartate biosynthetic process	1	1	FGRAMPH1_01G20357,	100	30.78	inf	0.0324934	0.189123	1
FGSG_03787	GO:0020027	hemoglobin metabolic process	1	1	FGRAMPH1_01G20341,	100	30.78	inf	0.0324934	0.189123	1
FGSG_08687	GO:0001403	invasive growth in response to glucose limitation	1	1	FGRAMPH1_01G19389,	100	30.78	inf	0.0324934	0.189123	1
FGSG_07988	GO:0000025	maltose catabolic process	1	1	FGRAMPH1_01G27969,	100	30.78	inf	0.0324934	0.189123	1
FGSG_02353	GO:0006102	isocitrate metabolic process	1	1	FGRAMPH1_01G07881,	100	30.78	inf	0.0324934	0.189123	1
FGSG_03272	GO:0000002	mitochondrial genome maintenance	9	2	FGRAMPH1_01G02091,FGRAMPH1_01G06231,	22.2	6.84	8.56	0.0325712	0.189123	1
FGSG_10411	GO:0009272	fungal-type cell wall biogenesis	9	2	FGRAMPH1_01G11619,FGRAMPH1_01G19389,	22.2	6.84	8.56	0.0325712	0.189123	1
FGSG_11184	GO:0019878	lysine biosynthetic process via aminoadipic acid	9	2	FGRAMPH1_01G20959,FGRAMPH1_01G21959,	22.2	6.84	8.56	0.0325712	0.189123	1
FGSG_09553	GO:0014070	response to organic cyclic compound	22	3	FGRAMPH1_01G04289,FGRAMPH1_01G27589,FGRAMPH1_01G27831,	13.6	4.2	4.74	0.0331091	0.190708	1
FGSG_08435	GO:0006575	cellular modified amino acid metabolic process	39	4	FGRAMPH1_01G02925,FGRAMPH1_01G07687,FGRAMPH1_01G09731,FGRAMPH1_01G27831,	10.3	3.16	3.44	0.0368061	0.21032	1
FGSG_02343	GO:0010033	response to organic substance	77	6	FGRAMPH1_01G04289,FGRAMPH1_01G12417,FGRAMPH1_01G20441,FGRAMPH1_01G22905,FGRAMPH1_01G27589,FGRAMPH1_01G27831,	7.8	2.4	2.55	0.0386941	0.219368	1
FGSG_08946	GO:0006749	glutathione metabolic process	10	2	FGRAMPH1_01G02925,FGRAMPH1_01G27831,	20	6.16	7.49	0.0398546	0.220733	1
FGSG_04741	GO:0046653	tetrahydrofolate metabolic process	10	2	FGRAMPH1_01G07687,FGRAMPH1_01G09731,	20	6.16	7.49	0.0398546	0.220733	1
FGSG_01523	GO:0007584	response to nutrient	10	2	FGRAMPH1_01G24961,FGRAMPH1_01G27589,	20	6.16	7.49	0.0398546	0.220733	1
FGSG_03968	GO:0009060	aerobic respiration	41	4	FGRAMPH1_01G05905,FGRAMPH1_01G06785,FGRAMPH1_01G07881,FGRAMPH1_01G10605,	9.8	3	3.25	0.0431127	0.236956	1
FGSG_11398	GO:0009617	response to bacterium	11	2	FGRAMPH1_01G27831,FGRAMPH1_01G27835,	18.2	5.6	6.66	0.0476859	0.252455	1
FGSG_06445	GO:0034033	purine nucleoside bisphosphate biosynthetic process	11	2	FGRAMPH1_01G00867,FGRAMPH1_01G03209,	18.2	5.6	6.66	0.0476859	0.252455	1
FGSG_03535	GO:0034030	ribonucleoside bisphosphate biosynthetic process	11	2	FGRAMPH1_01G00867,FGRAMPH1_01G03209,	18.2	5.6	6.66	0.0476859	0.252455	1
FGSG_08359	GO:0033866	nucleoside bisphosphate biosynthetic process	11	2	FGRAMPH1_01G00867,FGRAMPH1_01G03209,	18.2	5.6	6.66	0.0476859	0.252455	1
FGSG_07896	GO:0006721	terpenoid metabolic process	11	2	FGRAMPH1_01G03917,FGRAMPH1_01G13111,	18.2	5.6	6.66	0.0476859	0.252455	1
FGSG_14015
FGSG_04456
FGSG_13737
FGSG_00136
FGSG_11303
FGSG_03543
FGSG_11298
FGSG_10677
FGSG_06647
FGSG_03662
FGSG_07542
FGSG_03537
FGSG_08700
FGSG_03745
FGSG_00840
FGSG_03715
FGSG_11190
FGSG_03344
FGSG_09240
FGSG_04583
FGSG_11098
FGSG_12773
FGSG_07500
FGSG_07863
FGSG_11300
FGSG_12206
FGSG_03904
FGSG_01882
FGSG_02682
FGSG_04735
FGSG_03163
FGSG_03529
FGSG_13954
FGSG_13194
FGSG_00836
FGSG_08266
FGSG_12704
FGSG_11397
FGSG_00330
FGSG_10962
FGSG_11757
FGSG_09552
FGSG_11472
FGSG_10901
FGSG_05658
FGSG_11169
FGSG_13392
FGSG_13000
FGSG_11164
FGSG_06125
FGSG_10224
FGSG_06059
FGSG_04985
FGSG_10543
FGSG_08738
FGSG_12862
FGSG_02735
FGSG_02316
FGSG_09374
FGSG_01084
FGSG_01407
FGSG_05357
FGSG_04876
FGSG_09775
FGSG_11129
FGSG_09400
FGSG_12887
FGSG_04824
FGSG_08309
FGSG_05791
FGSG_08358
FGSG_01765
FGSG_05294
FGSG_10369
FGSG_13385
FGSG_02596
FGSG_05444
FGSG_02516
FGSG_11396
FGSG_08407
FGSG_06047
FGSG_06784
FGSG_04946
FGSG_09362
FGSG_07289
FGSG_11399
FGSG_10776
FGSG_03165
FGSG_03190
FGSG_09373
FGSG_09834
FGSG_08350
FGSG_03422
FGSG_06328
FGSG_03466
FGSG_03335
FGSG_01596
FGSG_02467
FGSG_05797
FGSG_07925
FGSG_06681
FGSG_10145
FGSG_03270
FGSG_03416
FGSG_09697
FGSG_09739
FGSG_10267
FGSG_02578
FGSG_05847
FGSG_03741
FGSG_03414
FGSG_09081
FGSG_11114
FGSG_03336
FGSG_08128
FGSG_11275
FGSG_04736
FGSG_09140
FGSG_08596
FGSG_05939
FGSG_00510
FGSG_03061
FGSG_04333
FGSG_05223
FGSG_03462
FGSG_03283
FGSG_07793
FGSG_11884
FGSG_07717
FGSG_01734
FGSG_08077
FGSG_03347
FGSG_11395
FGSG_02204
FGSG_09141
FGSG_08459
FGSG_06503
FGSG_03015
FGSG_09070
FGSG_10347
FGSG_01744
FGSG_03915
FGSG_06521
FGSG_04317
FGSG_02966
FGSG_03247
FGSG_12534
FGSG_02753
FGSG_00609
FGSG_02814
FGSG_11099
FGSG_08461
FGSG_09082
FGSG_03072
FGSG_02978
FGSG_02038
FGSG_03292
FGSG_04998
FGSG_02847
FGSG_12851
FGSG_12110
FGSG_07130
FGSG_11926
FGSG_12742
FGSG_08238
FGSG_04922
FGSG_03011
FGSG_05190
FGSG_11145
FGSG_10661
FGSG_08760
FGSG_00377
FGSG_07366
FGSG_09052
FGSG_00168
FGSG_03355
FGSG_10073
FGSG_03184
FGSG_04975
FGSG_11228
FGSG_07263
FGSG_03281
FGSG_03245
FGSG_02691
FGSG_03430
FGSG_05234
FGSG_10990
FGSG_12607
FGSG_02075
FGSG_11127
FGSG_01832
FGSG_04596
FGSG_03475
FGSG_02342
FGSG_03269
FGSG_04477
FGSG_01172
FGSG_01757
FGSG_02461
FGSG_09272
FGSG_00649
FGSG_05247
FGSG_03340
FGSG_02920
FGSG_05937
FGSG_10397
FGSG_04527
FGSG_10739
FGSG_11658
FGSG_09821
FGSG_01572
FGSG_00489
FGSG_02515
FGSG_09204
FGSG_07491
FGSG_06307
FGSG_08232
FGSG_12138
FGSG_03150
FGSG_02100
FGSG_07488
FGSG_00321
FGSG_11183
FGSG_04916
FGSG_06046
FGSG_02657
FGSG_02087
FGSG_01782
FGSG_08351
FGSG_01108
FGSG_10606
FGSG_00769
FGSG_06669
FGSG_07261
FGSG_02783
FGSG_11656

## Sheet: Up DEGs GO(SU)
	Gene ontology(GO) enrichment analysis of total upregulated DEGs in Sumai3
Gene list	ID	Name	Bgd count	Result count	Result gene list	Pct of bgd	Fold enrichment	Odds ratio	P-value	Benjamini	Bonferroni
FGSG_06246	GO:0005975	carbohydrate metabolic process	348	68	FGRAMPH1_01G00473,FGRAMPH1_01G00503,FGRAMPH1_01G01453,FGRAMPH1_01G03723,FGRAMPH1_01G03899,FGRAMPH1_01G04425,FGRAMPH1_01G04967,FGRAMPH1_01G06317,FGRAMPH1_01G06375,FGRAMPH1_01G06757,FGRAMPH1_01G06785,FGRAMPH1_01G08907,FGRAMPH1_01G09481,FGRAMPH1_01G10377,FGRAMPH1_01G10379,FGRAMPH1_01G10605,FGRAMPH1_01G10989,FGRAMPH1_01G11251,FGRAMPH1_01G11619,FGRAMPH1_01G11821,FGRAMPH1_01G11933,FGRAMPH1_01G12417,FGR…	19.5	3.28	4.25	5.31169e-19	4.98236e-16	4.98236e-16
FGSG_00921	GO:0000272	polysaccharide catabolic process	90	31	FGRAMPH1_01G01453,FGRAMPH1_01G06317,FGRAMPH1_01G06375,FGRAMPH1_01G08907,FGRAMPH1_01G09481,FGRAMPH1_01G10377,FGRAMPH1_01G11821,FGRAMPH1_01G12809,FGRAMPH1_01G12939,FGRAMPH1_01G12989,FGRAMPH1_01G13319,FGRAMPH1_01G13329,FGRAMPH1_01G13331,FGRAMPH1_01G13725,FGRAMPH1_01G13837,FGRAMPH1_01G14007,FGRAMPH1_01G16623,FGRAMPH1_01G20977,FGRAMPH1_01G21085,FGRAMPH1_01G21147,FGRAMPH1_01G21485,FGRAMPH1_01G21737,FGR…	34.4	5.78	8.75	2.20834e-16	1.03571e-13	2.07143e-13
FGSG_00695	GO:0005976	polysaccharide metabolic process	112	33	FGRAMPH1_01G01453,FGRAMPH1_01G06317,FGRAMPH1_01G06375,FGRAMPH1_01G08907,FGRAMPH1_01G09481,FGRAMPH1_01G10377,FGRAMPH1_01G11619,FGRAMPH1_01G11821,FGRAMPH1_01G12809,FGRAMPH1_01G12939,FGRAMPH1_01G12989,FGRAMPH1_01G13319,FGRAMPH1_01G13329,FGRAMPH1_01G13331,FGRAMPH1_01G13725,FGRAMPH1_01G13769,FGRAMPH1_01G13837,FGRAMPH1_01G14007,FGRAMPH1_01G16623,FGRAMPH1_01G20977,FGRAMPH1_01G21085,FGRAMPH1_01G21147,FGR…	29.5	4.94	6.96	4.45618e-15	1.3933e-12	4.17989e-12
FGSG_05422	GO:0016052	carbohydrate catabolic process	151	36	FGRAMPH1_01G01453,FGRAMPH1_01G06317,FGRAMPH1_01G06375,FGRAMPH1_01G06757,FGRAMPH1_01G08907,FGRAMPH1_01G09481,FGRAMPH1_01G10377,FGRAMPH1_01G10989,FGRAMPH1_01G11821,FGRAMPH1_01G12417,FGRAMPH1_01G12467,FGRAMPH1_01G12809,FGRAMPH1_01G12939,FGRAMPH1_01G12989,FGRAMPH1_01G13319,FGRAMPH1_01G13329,FGRAMPH1_01G13331,FGRAMPH1_01G13725,FGRAMPH1_01G13837,FGRAMPH1_01G14007,FGRAMPH1_01G16623,FGRAMPH1_01G19389,FGR…	23.8	4	5.23	3.27625e-13	7.68281e-11	3.07313e-10
FGSG_02658	GO:0044264	cellular polysaccharide metabolic process	41	16	FGRAMPH1_01G01453,FGRAMPH1_01G06317,FGRAMPH1_01G06375,FGRAMPH1_01G09481,FGRAMPH1_01G11619,FGRAMPH1_01G12939,FGRAMPH1_01G13319,FGRAMPH1_01G13329,FGRAMPH1_01G13331,FGRAMPH1_01G13837,FGRAMPH1_01G16623,FGRAMPH1_01G20977,FGRAMPH1_01G21737,FGRAMPH1_01G22187,FGRAMPH1_01G22295,FGRAMPH1_01G25243,	39	6.54	10.38	5.22366e-10	9.79958e-08	4.89979e-07
FGSG_06154	GO:0044262	cellular carbohydrate metabolic process	87	22	FGRAMPH1_01G01453,FGRAMPH1_01G03723,FGRAMPH1_01G06317,FGRAMPH1_01G06375,FGRAMPH1_01G06757,FGRAMPH1_01G06785,FGRAMPH1_01G09481,FGRAMPH1_01G10605,FGRAMPH1_01G11619,FGRAMPH1_01G12417,FGRAMPH1_01G12467,FGRAMPH1_01G12939,FGRAMPH1_01G13319,FGRAMPH1_01G13329,FGRAMPH1_01G13331,FGRAMPH1_01G13837,FGRAMPH1_01G16623,FGRAMPH1_01G20977,FGRAMPH1_01G21737,FGRAMPH1_01G22187,FGRAMPH1_01G22295,FGRAMPH1_01G25243,	25.3	4.24	5.53	4.40677e-09	6.88925e-07	4.13355e-06
FGSG_08786	GO:0010383	cell wall polysaccharide metabolic process	13	8	FGRAMPH1_01G11619,FGRAMPH1_01G13319,FGRAMPH1_01G13331,FGRAMPH1_01G20977,FGRAMPH1_01G21737,FGRAMPH1_01G22187,FGRAMPH1_01G22295,FGRAMPH1_01G25243,	61.5	10.32	25.61	1.49574e-07	1.7705e-05	0.000140301
FGSG_00421	GO:0008299	isoprenoid biosynthetic process	22	10	FGRAMPH1_01G00053,FGRAMPH1_01G07999,FGRAMPH1_01G08071,FGRAMPH1_01G13111,FGRAMPH1_01G15653,FGRAMPH1_01G19063,FGRAMPH1_01G23179,FGRAMPH1_01G26431,FGRAMPH1_01G27519,FGRAMPH1_01G27691,	45.5	7.62	13.38	1.75937e-07	1.7705e-05	0.000165029
FGSG_01059	GO:0009057	macromolecule catabolic process	219	34	FGRAMPH1_01G00867,FGRAMPH1_01G01453,FGRAMPH1_01G06317,FGRAMPH1_01G06375,FGRAMPH1_01G07417,FGRAMPH1_01G08907,FGRAMPH1_01G09481,FGRAMPH1_01G10377,FGRAMPH1_01G11821,FGRAMPH1_01G12809,FGRAMPH1_01G12939,FGRAMPH1_01G12989,FGRAMPH1_01G13319,FGRAMPH1_01G13329,FGRAMPH1_01G13331,FGRAMPH1_01G13725,FGRAMPH1_01G13837,FGRAMPH1_01G14007,FGRAMPH1_01G15221,FGRAMPH1_01G16623,FGRAMPH1_01G20977,FGRAMPH1_01G21085,FGR…	15.5	2.6	3.03	2.15888e-07	1.7705e-05	0.000202503
FGSG_04824	GO:0044347	cell wall polysaccharide catabolic process	10	7	FGRAMPH1_01G13319,FGRAMPH1_01G13331,FGRAMPH1_01G20977,FGRAMPH1_01G21737,FGRAMPH1_01G22187,FGRAMPH1_01G22295,FGRAMPH1_01G25243,	70	11.74	37.28	2.64253e-07	1.7705e-05	0.00024787
FGSG_10949	GO:0045491	xylan metabolic process	10	7	FGRAMPH1_01G13319,FGRAMPH1_01G13331,FGRAMPH1_01G20977,FGRAMPH1_01G21737,FGRAMPH1_01G22187,FGRAMPH1_01G22295,FGRAMPH1_01G25243,	70	11.74	37.28	2.64253e-07	1.7705e-05	0.00024787
FGSG_01829	GO:0010410	hemicellulose metabolic process	10	7	FGRAMPH1_01G13319,FGRAMPH1_01G13331,FGRAMPH1_01G20977,FGRAMPH1_01G21737,FGRAMPH1_01G22187,FGRAMPH1_01G22295,FGRAMPH1_01G25243,	70	11.74	37.28	2.64253e-07	1.7705e-05	0.00024787
FGSG_07401	GO:0045493	xylan catabolic process	10	7	FGRAMPH1_01G13319,FGRAMPH1_01G13331,FGRAMPH1_01G20977,FGRAMPH1_01G21737,FGRAMPH1_01G22187,FGRAMPH1_01G22295,FGRAMPH1_01G25243,	70	11.74	37.28	2.64253e-07	1.7705e-05	0.00024787
FGSG_04126	GO:0016998	cell wall macromolecule catabolic process	10	7	FGRAMPH1_01G13319,FGRAMPH1_01G13331,FGRAMPH1_01G20977,FGRAMPH1_01G21737,FGRAMPH1_01G22187,FGRAMPH1_01G22295,FGRAMPH1_01G25243,	70	11.74	37.28	2.64253e-07	1.7705e-05	0.00024787
FGSG_07237	GO:0006720	isoprenoid metabolic process	29	11	FGRAMPH1_01G00053,FGRAMPH1_01G03917,FGRAMPH1_01G07999,FGRAMPH1_01G08071,FGRAMPH1_01G13111,FGRAMPH1_01G15653,FGRAMPH1_01G19063,FGRAMPH1_01G23179,FGRAMPH1_01G26431,FGRAMPH1_01G27519,FGRAMPH1_01G27691,	37.9	6.36	9.82	3.94875e-07	2.46929e-05	0.000370393
FGSG_08749	GO:1901575	organic substance catabolic process	434	52	FGRAMPH1_01G00867,FGRAMPH1_01G01149,FGRAMPH1_01G01453,FGRAMPH1_01G04993,FGRAMPH1_01G06317,FGRAMPH1_01G06375,FGRAMPH1_01G06757,FGRAMPH1_01G07417,FGRAMPH1_01G08907,FGRAMPH1_01G09481,FGRAMPH1_01G09735,FGRAMPH1_01G10377,FGRAMPH1_01G10989,FGRAMPH1_01G11459,FGRAMPH1_01G11821,FGRAMPH1_01G11989,FGRAMPH1_01G12417,FGRAMPH1_01G12467,FGRAMPH1_01G12809,FGRAMPH1_01G12939,FGRAMPH1_01G12989,FGRAMPH1_01G13319,FGR…	12	2.01	2.27	8.38879e-07	4.91793e-05	0.000786868
FGSG_05159	GO:0044036	cell wall macromolecule metabolic process	17	8	FGRAMPH1_01G11619,FGRAMPH1_01G13319,FGRAMPH1_01G13331,FGRAMPH1_01G20977,FGRAMPH1_01G21737,FGRAMPH1_01G22187,FGRAMPH1_01G22295,FGRAMPH1_01G25243,	47.1	7.89	14.22	2.28157e-06	0.000125889	0.00214012
FGSG_07379	GO:0009056	catabolic process	480	54	FGRAMPH1_01G00867,FGRAMPH1_01G01149,FGRAMPH1_01G01453,FGRAMPH1_01G04993,FGRAMPH1_01G06317,FGRAMPH1_01G06375,FGRAMPH1_01G06757,FGRAMPH1_01G07417,FGRAMPH1_01G08907,FGRAMPH1_01G09481,FGRAMPH1_01G09735,FGRAMPH1_01G10377,FGRAMPH1_01G10989,FGRAMPH1_01G11459,FGRAMPH1_01G11821,FGRAMPH1_01G11989,FGRAMPH1_01G12095,FGRAMPH1_01G12245,FGRAMPH1_01G12417,FGRAMPH1_01G12467,FGRAMPH1_01G12809,FGRAMPH1_01G12939,FGR…	11.3	1.89	2.11	3.62829e-06	0.000189074	0.00340333
FGSG_09934	GO:0006826	iron ion transport	19	8	FGRAMPH1_01G01375,FGRAMPH1_01G04343,FGRAMPH1_01G05431,FGRAMPH1_01G12341,FGRAMPH1_01G13601,FGRAMPH1_01G16541,FGRAMPH1_01G21059,FGRAMPH1_01G25331,	42.1	7.06	11.63	6.37594e-06	0.00031477	0.00598063
FGSG_07186	GO:0044275	cellular carbohydrate catabolic process	39	11	FGRAMPH1_01G01453,FGRAMPH1_01G06317,FGRAMPH1_01G06375,FGRAMPH1_01G06757,FGRAMPH1_01G09481,FGRAMPH1_01G12417,FGRAMPH1_01G12467,FGRAMPH1_01G12939,FGRAMPH1_01G13329,FGRAMPH1_01G13837,FGRAMPH1_01G16623,	28.2	4.73	6.31	1.10757e-05	0.00051945	0.010389
FGSG_02233	GO:0055114	obsolete oxidation-reduction process	895	84	FGRAMPH1_01G00053,FGRAMPH1_01G00223,FGRAMPH1_01G00443,FGRAMPH1_01G01929,FGRAMPH1_01G02461,FGRAMPH1_01G03723,FGRAMPH1_01G04045,FGRAMPH1_01G04343,FGRAMPH1_01G04431,FGRAMPH1_01G04949,FGRAMPH1_01G05035,FGRAMPH1_01G06005,FGRAMPH1_01G06445,FGRAMPH1_01G06927,FGRAMPH1_01G07101,FGRAMPH1_01G07199,FGRAMPH1_01G07527,FGRAMPH1_01G07543,FGRAMPH1_01G08577,FGRAMPH1_01G08679,FGRAMPH1_01G09063,FGRAMPH1_01G09161,FGR…	9.4	1.57	1.75	1.21836e-05	0.000544203	0.0114283
FGSG_06841	GO:0044247	cellular polysaccharide catabolic process	21	8	FGRAMPH1_01G01453,FGRAMPH1_01G06317,FGRAMPH1_01G06375,FGRAMPH1_01G09481,FGRAMPH1_01G12939,FGRAMPH1_01G13329,FGRAMPH1_01G13837,FGRAMPH1_01G16623,	38.1	6.39	9.84	1.54315e-05	0.000657943	0.0144747
FGSG_09638	GO:0008152	metabolic process	3697	265	FGRAMPH1_01G00053,FGRAMPH1_01G00223,FGRAMPH1_01G00443,FGRAMPH1_01G00473,FGRAMPH1_01G00503,FGRAMPH1_01G00867,FGRAMPH1_01G01095,FGRAMPH1_01G01149,FGRAMPH1_01G01453,FGRAMPH1_01G01533,FGRAMPH1_01G01655,FGRAMPH1_01G01751,FGRAMPH1_01G01929,FGRAMPH1_01G02019,FGRAMPH1_01G02103,FGRAMPH1_01G02461,FGRAMPH1_01G02925,FGRAMPH1_01G02945,FGRAMPH1_01G02989,FGRAMPH1_01G03009,FGRAMPH1_01G03723,FGRAMPH1_01G03899,FGR…	7.2	1.2	1.44	3.16897e-05	0.00129239	0.0297249
FGSG_10210	GO:0015687	ferric-hydroxamate import into cell	5	4	FGRAMPH1_01G05431,FGRAMPH1_01G13601,FGRAMPH1_01G21059,FGRAMPH1_01G25331,	80	13.42	63.56	5.9568e-05	0.00206944	0.0558748
FGSG_08130	GO:0042928	ferrichrome import into cell	5	4	FGRAMPH1_01G05431,FGRAMPH1_01G13601,FGRAMPH1_01G21059,FGRAMPH1_01G25331,	80	13.42	63.56	5.9568e-05	0.00206944	0.0558748
FGSG_11488	GO:0033214	siderophore-dependent iron import into cell	5	4	FGRAMPH1_01G05431,FGRAMPH1_01G13601,FGRAMPH1_01G21059,FGRAMPH1_01G25331,	80	13.42	63.56	5.9568e-05	0.00206944	0.0558748
FGSG_06010	GO:1901678	iron coordination entity transport	5	4	FGRAMPH1_01G05431,FGRAMPH1_01G13601,FGRAMPH1_01G21059,FGRAMPH1_01G25331,	80	13.42	63.56	5.9568e-05	0.00206944	0.0558748
FGSG_10940	GO:0016126	sterol biosynthetic process	25	8	FGRAMPH1_01G06005,FGRAMPH1_01G08071,FGRAMPH1_01G11303,FGRAMPH1_01G19063,FGRAMPH1_01G23179,FGRAMPH1_01G24501,FGRAMPH1_01G27519,FGRAMPH1_01G27691,	32	5.37	7.52	6.63121e-05	0.00222145	0.0622007
FGSG_00006	GO:0055072	iron ion homeostasis	15	6	FGRAMPH1_01G01375,FGRAMPH1_01G05431,FGRAMPH1_01G13601,FGRAMPH1_01G17241,FGRAMPH1_01G21059,FGRAMPH1_01G25331,	40	6.71	10.62	0.000137544	0.00444883	0.129016
FGSG_02908	GO:0006081	cellular aldehyde metabolic process	10	5	FGRAMPH1_01G06785,FGRAMPH1_01G06927,FGRAMPH1_01G10605,FGRAMPH1_01G20441,FGRAMPH1_01G22905,	50	8.39	15.91	0.000145042	0.00453497	0.136049
FGSG_01870	GO:0071554	cell wall organization or biogenesis	87	15	FGRAMPH1_01G00473,FGRAMPH1_01G03899,FGRAMPH1_01G06465,FGRAMPH1_01G11619,FGRAMPH1_01G12467,FGRAMPH1_01G12809,FGRAMPH1_01G13319,FGRAMPH1_01G13331,FGRAMPH1_01G19389,FGRAMPH1_01G20977,FGRAMPH1_01G21737,FGRAMPH1_01G22135,FGRAMPH1_01G22187,FGRAMPH1_01G22295,FGRAMPH1_01G25243,	17.2	2.89	3.35	0.000170067	0.0051459	0.159523
FGSG_02353	GO:0006529	asparagine biosynthetic process	3	3	FGRAMPH1_01G01533,FGRAMPH1_01G06867,FGRAMPH1_01G21961,	100	16.77	inf	0.000210868	0.00605114	0.197794
FGSG_10908	GO:0006694	steroid biosynthetic process	29	8	FGRAMPH1_01G06005,FGRAMPH1_01G08071,FGRAMPH1_01G11303,FGRAMPH1_01G19063,FGRAMPH1_01G23179,FGRAMPH1_01G24501,FGRAMPH1_01G27519,FGRAMPH1_01G27691,	27.6	4.63	6.09	0.000212887	0.00605114	0.199688
FGSG_02051	GO:0030243	cellulose metabolic process	17	6	FGRAMPH1_01G01453,FGRAMPH1_01G06317,FGRAMPH1_01G06375,FGRAMPH1_01G09481,FGRAMPH1_01G13329,FGRAMPH1_01G16623,	35.3	5.92	8.69	0.000306916	0.00799687	0.287887
FGSG_01661	GO:0030245	cellulose catabolic process	17	6	FGRAMPH1_01G01453,FGRAMPH1_01G06317,FGRAMPH1_01G06375,FGRAMPH1_01G09481,FGRAMPH1_01G13329,FGRAMPH1_01G16623,	35.3	5.92	8.69	0.000306916	0.00799687	0.287887
FGSG_10202	GO:0051275	beta-glucan catabolic process	17	6	FGRAMPH1_01G01453,FGRAMPH1_01G06317,FGRAMPH1_01G06375,FGRAMPH1_01G09481,FGRAMPH1_01G13329,FGRAMPH1_01G16623,	35.3	5.92	8.69	0.000306916	0.00799687	0.287887
FGSG_08644	GO:0044281	small molecule metabolic process	634	59	FGRAMPH1_01G00867,FGRAMPH1_01G01095,FGRAMPH1_01G01533,FGRAMPH1_01G02461,FGRAMPH1_01G02925,FGRAMPH1_01G03723,FGRAMPH1_01G04271,FGRAMPH1_01G04993,FGRAMPH1_01G05453,FGRAMPH1_01G06005,FGRAMPH1_01G06757,FGRAMPH1_01G06785,FGRAMPH1_01G06867,FGRAMPH1_01G07333,FGRAMPH1_01G07527,FGRAMPH1_01G08071,FGRAMPH1_01G09513,FGRAMPH1_01G09735,FGRAMPH1_01G10555,FGRAMPH1_01G10605,FGRAMPH1_01G10989,FGRAMPH1_01G11303,FGR…	9.3	1.56	1.7	0.000347377	0.00868906	0.32584
FGSG_02785	GO:0016125	sterol metabolic process	31	8	FGRAMPH1_01G06005,FGRAMPH1_01G08071,FGRAMPH1_01G11303,FGRAMPH1_01G19063,FGRAMPH1_01G23179,FGRAMPH1_01G24501,FGRAMPH1_01G27519,FGRAMPH1_01G27691,	25.8	4.33	5.56	0.000352009	0.00868906	0.330184
FGSG_09870	GO:0000041	transition metal ion transport	33	8	FGRAMPH1_01G01375,FGRAMPH1_01G04343,FGRAMPH1_01G05431,FGRAMPH1_01G12341,FGRAMPH1_01G13601,FGRAMPH1_01G16541,FGRAMPH1_01G21059,FGRAMPH1_01G25331,	24.2	4.07	5.11	0.000557455	0.0134075	0.522893
FGSG_00162	GO:0009251	glucan catabolic process	19	6	FGRAMPH1_01G01453,FGRAMPH1_01G06317,FGRAMPH1_01G06375,FGRAMPH1_01G09481,FGRAMPH1_01G13329,FGRAMPH1_01G16623,	31.6	5.3	7.35	0.000607335	0.014242	0.56968
FGSG_07560	GO:0033212	iron import into cell	8	4	FGRAMPH1_01G05431,FGRAMPH1_01G13601,FGRAMPH1_01G21059,FGRAMPH1_01G25331,	50	8.39	15.88	0.000721417	0.0165046	0.676689
FGSG_06619	GO:0015936	coenzyme A metabolic process	4	3	FGRAMPH1_01G05453,FGRAMPH1_01G10555,FGRAMPH1_01G27691,	75	12.58	47.58	0.000805955	0.0175741	0.755986
FGSG_02488	GO:0031221	arabinan metabolic process	4	3	FGRAMPH1_01G11821,FGRAMPH1_01G13769,FGRAMPH1_01G22335,	75	12.58	47.58	0.000805955	0.0175741	0.755986
FGSG_11045	GO:0051273	beta-glucan metabolic process	20	6	FGRAMPH1_01G01453,FGRAMPH1_01G06317,FGRAMPH1_01G06375,FGRAMPH1_01G09481,FGRAMPH1_01G13329,FGRAMPH1_01G16623,	30	5.03	6.83	0.000824372	0.0175741	0.773261
FGSG_06165	GO:0044248	cellular catabolic process	337	35	FGRAMPH1_01G00867,FGRAMPH1_01G01149,FGRAMPH1_01G01453,FGRAMPH1_01G04993,FGRAMPH1_01G06317,FGRAMPH1_01G06375,FGRAMPH1_01G06757,FGRAMPH1_01G07417,FGRAMPH1_01G09481,FGRAMPH1_01G09735,FGRAMPH1_01G10989,FGRAMPH1_01G11459,FGRAMPH1_01G11989,FGRAMPH1_01G12095,FGRAMPH1_01G12245,FGRAMPH1_01G12417,FGRAMPH1_01G12467,FGRAMPH1_01G12939,FGRAMPH1_01G13319,FGRAMPH1_01G13329,FGRAMPH1_01G13331,FGRAMPH1_01G13837,FGR…	10.4	1.74	1.89	0.000888042	0.0185107	0.832983
FGSG_13947	GO:0009405	obsolete pathogenesis	92	14	FGRAMPH1_01G00053,FGRAMPH1_01G01655,FGRAMPH1_01G06785,FGRAMPH1_01G07999,FGRAMPH1_01G11725,FGRAMPH1_01G13319,FGRAMPH1_01G19107,FGRAMPH1_01G19297,FGRAMPH1_01G20955,FGRAMPH1_01G20959,FGRAMPH1_01G20977,FGRAMPH1_01G21737,FGRAMPH1_01G22187,FGRAMPH1_01G22295,	15.2	2.55	2.88	0.00102469	0.0208947	0.961155
FGSG_08911	GO:0098657	import into cell	9	4	FGRAMPH1_01G05431,FGRAMPH1_01G13601,FGRAMPH1_01G21059,FGRAMPH1_01G25331,	44.4	7.45	12.71	0.00123755	0.0245378	1
FGSG_04470	GO:0008202	steroid metabolic process	37	8	FGRAMPH1_01G06005,FGRAMPH1_01G08071,FGRAMPH1_01G11303,FGRAMPH1_01G19063,FGRAMPH1_01G23179,FGRAMPH1_01G24501,FGRAMPH1_01G27519,FGRAMPH1_01G27691,	21.6	3.63	4.4	0.00125567	0.0245378	1
FGSG_07907	GO:0042886	amide transport	15	5	FGRAMPH1_01G05431,FGRAMPH1_01G12663,FGRAMPH1_01G13601,FGRAMPH1_01G21059,FGRAMPH1_01G25331,	33.3	5.59	7.95	0.00134624	0.0257709	1
FGSG_01974	GO:0046373	L-arabinose metabolic process	5	3	FGRAMPH1_01G13769,FGRAMPH1_01G22335,FGRAMPH1_01G25243,	60	10.06	23.79	0.00192554	0.0361231	1
FGSG_03072	GO:0008610	lipid biosynthetic process	146	18	FGRAMPH1_01G00053,FGRAMPH1_01G06005,FGRAMPH1_01G07999,FGRAMPH1_01G08071,FGRAMPH1_01G11303,FGRAMPH1_01G13111,FGRAMPH1_01G15653,FGRAMPH1_01G16807,FGRAMPH1_01G16829,FGRAMPH1_01G17255,FGRAMPH1_01G19063,FGRAMPH1_01G22079,FGRAMPH1_01G23179,FGRAMPH1_01G24501,FGRAMPH1_01G26177,FGRAMPH1_01G26431,FGRAMPH1_01G27519,FGRAMPH1_01G27691,	12.3	2.07	2.26	0.00257609	0.0473798	1
FGSG_11062	GO:0055076	transition metal ion homeostasis	25	6	FGRAMPH1_01G01375,FGRAMPH1_01G05431,FGRAMPH1_01G13601,FGRAMPH1_01G17241,FGRAMPH1_01G21059,FGRAMPH1_01G25331,	24	4.02	5.03	0.00291968	0.0483441	1
FGSG_09906	GO:0110095	cellular detoxification of aldehyde	2	2	FGRAMPH1_01G20441,FGRAMPH1_01G22905,	100	16.77	inf	0.00354914	0.0483441	1
FGSG_01131	GO:0110096	cellular response to aldehyde	2	2	FGRAMPH1_01G20441,FGRAMPH1_01G22905,	100	16.77	inf	0.00354914	0.0483441	1
FGSG_03842	GO:0051761	sesquiterpene metabolic process	2	2	FGRAMPH1_01G00053,FGRAMPH1_01G07999,	100	16.77	inf	0.00354914	0.0483441	1
FGSG_09883	GO:0046379	extracellular polysaccharide metabolic process	2	2	FGRAMPH1_01G12939,FGRAMPH1_01G13837,	100	16.77	inf	0.00354914	0.0483441	1
FGSG_12438	GO:0051762	sesquiterpene biosynthetic process	2	2	FGRAMPH1_01G00053,FGRAMPH1_01G07999,	100	16.77	inf	0.00354914	0.0483441	1
FGSG_03635	GO:0046246	terpene biosynthetic process	2	2	FGRAMPH1_01G00053,FGRAMPH1_01G07999,	100	16.77	inf	0.00354914	0.0483441	1
FGSG_01768	GO:0046292	formaldehyde metabolic process	2	2	FGRAMPH1_01G20441,FGRAMPH1_01G22905,	100	16.77	inf	0.00354914	0.0483441	1
FGSG_04285	GO:0046459	short-chain fatty acid metabolic process	2	2	FGRAMPH1_01G09513,FGRAMPH1_01G10989,	100	16.77	inf	0.00354914	0.0483441	1
FGSG_02794	GO:0120251	hydrocarbon biosynthetic process	2	2	FGRAMPH1_01G00053,FGRAMPH1_01G07999,	100	16.77	inf	0.00354914	0.0483441	1
FGSG_04252	GO:0019679	propionate metabolic process, methylcitrate cycle	2	2	FGRAMPH1_01G09513,FGRAMPH1_01G10989,	100	16.77	inf	0.00354914	0.0483441	1
FGSG_00173	GO:0120252	hydrocarbon metabolic process	2	2	FGRAMPH1_01G00053,FGRAMPH1_01G07999,	100	16.77	inf	0.00354914	0.0483441	1
FGSG_04667	GO:0046294	formaldehyde catabolic process	2	2	FGRAMPH1_01G20441,FGRAMPH1_01G22905,	100	16.77	inf	0.00354914	0.0483441	1
FGSG_11101	GO:0019541	propionate metabolic process	2	2	FGRAMPH1_01G09513,FGRAMPH1_01G10989,	100	16.77	inf	0.00354914	0.0483441	1
FGSG_08011	GO:0042214	terpene metabolic process	2	2	FGRAMPH1_01G00053,FGRAMPH1_01G07999,	100	16.77	inf	0.00354914	0.0483441	1
FGSG_13064	GO:0006103	2-oxoglutarate metabolic process	2	2	FGRAMPH1_01G14529,FGRAMPH1_01G20357,	100	16.77	inf	0.00354914	0.0483441	1
FGSG_09738	GO:0019551	glutamate catabolic process to 2-oxoglutarate	2	2	FGRAMPH1_01G14529,FGRAMPH1_01G20357,	100	16.77	inf	0.00354914	0.0483441	1
FGSG_03114	GO:0006073	cellular glucan metabolic process	26	6	FGRAMPH1_01G01453,FGRAMPH1_01G06317,FGRAMPH1_01G06375,FGRAMPH1_01G09481,FGRAMPH1_01G13329,FGRAMPH1_01G16623,	23.1	3.87	4.77	0.00360777	0.0483441	1
FGSG_06331	GO:0044042	glucan metabolic process	26	6	FGRAMPH1_01G01453,FGRAMPH1_01G06317,FGRAMPH1_01G06375,FGRAMPH1_01G09481,FGRAMPH1_01G13329,FGRAMPH1_01G16623,	23.1	3.87	4.77	0.00360777	0.0483441	1
FGSG_05255	GO:0019566	arabinose metabolic process	6	3	FGRAMPH1_01G13769,FGRAMPH1_01G22335,FGRAMPH1_01G25243,	50	8.39	15.86	0.00368081	0.0486282	1
FGSG_10257	GO:0009067	aspartate family amino acid biosynthetic process	35	7	FGRAMPH1_01G01533,FGRAMPH1_01G06867,FGRAMPH1_01G20357,FGRAMPH1_01G20869,FGRAMPH1_01G20959,FGRAMPH1_01G21959,FGRAMPH1_01G21961,	20	3.35	3.98	0.00401474	0.0523032	1
FGSG_04736	GO:0006536	glutamate metabolic process	12	4	FGRAMPH1_01G11989,FGRAMPH1_01G14529,FGRAMPH1_01G20357,FGRAMPH1_01G26395,	33.3	5.59	7.94	0.0042109	0.0541071	1
FGSG_04181	GO:0022613	ribonucleoprotein complex biogenesis	157	18	FGRAMPH1_01G01751,FGRAMPH1_01G04529,FGRAMPH1_01G05969,FGRAMPH1_01G06103,FGRAMPH1_01G07041,FGRAMPH1_01G07777,FGRAMPH1_01G17655,FGRAMPH1_01G18739,FGRAMPH1_01G19651,FGRAMPH1_01G20017,FGRAMPH1_01G20773,FGRAMPH1_01G20849,FGRAMPH1_01G23641,FGRAMPH1_01G23673,FGRAMPH1_01G24313,FGRAMPH1_01G24371,FGRAMPH1_01G24867,FGRAMPH1_01G26257,	11.5	1.92	2.08	0.00562308	0.0712764	1
FGSG_07556	GO:0006879	cellular iron ion homeostasis	13	4	FGRAMPH1_01G05431,FGRAMPH1_01G13601,FGRAMPH1_01G21059,FGRAMPH1_01G25331,	30.8	5.16	7.06	0.00579909	0.0725273	1
FGSG_08439	GO:0009066	aspartate family amino acid metabolic process	47	8	FGRAMPH1_01G01533,FGRAMPH1_01G06867,FGRAMPH1_01G20357,FGRAMPH1_01G20869,FGRAMPH1_01G20959,FGRAMPH1_01G21959,FGRAMPH1_01G21961,FGRAMPH1_01G26395,	17	2.85	3.27	0.00605867	0.0747768	1
FGSG_00840	GO:0006528	asparagine metabolic process	7	3	FGRAMPH1_01G01533,FGRAMPH1_01G06867,FGRAMPH1_01G21961,	42.9	7.19	11.89	0.00615753	0.0749815	1
FGSG_00059	GO:0034032	purine nucleoside bisphosphate metabolic process	29	6	FGRAMPH1_01G00867,FGRAMPH1_01G05453,FGRAMPH1_01G08071,FGRAMPH1_01G10555,FGRAMPH1_01G19063,FGRAMPH1_01G27691,	20.7	3.47	4.15	0.00639501	0.0749815	1
FGSG_03073	GO:0033865	nucleoside bisphosphate metabolic process	29	6	FGRAMPH1_01G00867,FGRAMPH1_01G05453,FGRAMPH1_01G08071,FGRAMPH1_01G10555,FGRAMPH1_01G19063,FGRAMPH1_01G27691,	20.7	3.47	4.15	0.00639501	0.0749815	1
FGSG_10177	GO:0033875	ribonucleoside bisphosphate metabolic process	29	6	FGRAMPH1_01G00867,FGRAMPH1_01G05453,FGRAMPH1_01G08071,FGRAMPH1_01G10555,FGRAMPH1_01G19063,FGRAMPH1_01G27691,	20.7	3.47	4.15	0.00639501	0.0749815	1
FGSG_10200	GO:0009065	glutamine family amino acid catabolic process	14	4	FGRAMPH1_01G11459,FGRAMPH1_01G11989,FGRAMPH1_01G14529,FGRAMPH1_01G20357,	28.6	4.79	6.35	0.00774139	0.0896472	1
FGSG_05615	GO:0030001	metal ion transport	83	11	FGRAMPH1_01G01375,FGRAMPH1_01G04343,FGRAMPH1_01G05431,FGRAMPH1_01G12341,FGRAMPH1_01G12947,FGRAMPH1_01G13601,FGRAMPH1_01G14189,FGRAMPH1_01G16541,FGRAMPH1_01G20055,FGRAMPH1_01G21059,FGRAMPH1_01G25331,	13.3	2.22	2.44	0.00991964	0.102039	1
FGSG_04913	GO:0009240	isopentenyl diphosphate biosynthetic process	3	2	FGRAMPH1_01G08071,FGRAMPH1_01G19063,	66.7	11.18	31.66	0.0102257	0.102039	1
FGSG_03273	GO:0006106	fumarate metabolic process	3	2	FGRAMPH1_01G14529,FGRAMPH1_01G20357,	66.7	11.18	31.66	0.0102257	0.102039	1
FGSG_12105	GO:0046490	isopentenyl diphosphate metabolic process	3	2	FGRAMPH1_01G08071,FGRAMPH1_01G19063,	66.7	11.18	31.66	0.0102257	0.102039	1
FGSG_04993	GO:0006538	glutamate catabolic process	3	2	FGRAMPH1_01G14529,FGRAMPH1_01G20357,	66.7	11.18	31.66	0.0102257	0.102039	1
FGSG_08359	GO:0097237	cellular response to toxic substance	3	2	FGRAMPH1_01G20441,FGRAMPH1_01G22905,	66.7	11.18	31.66	0.0102257	0.102039	1
FGSG_10735	GO:0006097	glyoxylate cycle	3	2	FGRAMPH1_01G06785,FGRAMPH1_01G10605,	66.7	11.18	31.66	0.0102257	0.102039	1
FGSG_01891	GO:0046185	aldehyde catabolic process	3	2	FGRAMPH1_01G20441,FGRAMPH1_01G22905,	66.7	11.18	31.66	0.0102257	0.102039	1
FGSG_05912	GO:1990748	cellular detoxification	3	2	FGRAMPH1_01G20441,FGRAMPH1_01G22905,	66.7	11.18	31.66	0.0102257	0.102039	1
FGSG_01675	GO:0031222	arabinan catabolic process	3	2	FGRAMPH1_01G11821,FGRAMPH1_01G22335,	66.7	11.18	31.66	0.0102257	0.102039	1
FGSG_05957	GO:0019287	isopentenyl diphosphate biosynthetic process, mevalonate pathway	3	2	FGRAMPH1_01G08071,FGRAMPH1_01G19063,	66.7	11.18	31.66	0.0102257	0.102039	1
FGSG_20079	GO:0015937	coenzyme A biosynthetic process	3	2	FGRAMPH1_01G05453,FGRAMPH1_01G10555,	66.7	11.18	31.66	0.0102257	0.102039	1
FGSG_20058	GO:0030308	negative regulation of cell growth	3	2	FGRAMPH1_01G02925,FGRAMPH1_01G11309,	66.7	11.18	31.66	0.0102257	0.102039	1
FGSG_08335	GO:0044282	small molecule catabolic process	108	13	FGRAMPH1_01G06757,FGRAMPH1_01G09735,FGRAMPH1_01G10989,FGRAMPH1_01G11459,FGRAMPH1_01G11989,FGRAMPH1_01G12417,FGRAMPH1_01G14529,FGRAMPH1_01G14551,FGRAMPH1_01G19389,FGRAMPH1_01G19545,FGRAMPH1_01G20357,FGRAMPH1_01G20441,FGRAMPH1_01G22905,	12	2.02	2.19	0.0117286	0.115804	1
FGSG_02700	GO:1901617	organic hydroxy compound biosynthetic process	53	8	FGRAMPH1_01G06005,FGRAMPH1_01G08071,FGRAMPH1_01G11303,FGRAMPH1_01G19063,FGRAMPH1_01G23179,FGRAMPH1_01G24501,FGRAMPH1_01G27519,FGRAMPH1_01G27691,	15.1	2.53	2.83	0.0125018	0.122153	1
FGSG_05777	GO:0042592	homeostatic process	75	10	FGRAMPH1_01G01375,FGRAMPH1_01G05431,FGRAMPH1_01G09063,FGRAMPH1_01G10547,FGRAMPH1_01G12245,FGRAMPH1_01G13601,FGRAMPH1_01G17241,FGRAMPH1_01G21059,FGRAMPH1_01G25331,FGRAMPH1_01G26587,	13.3	2.24	2.45	0.0130872	0.126554	1
FGSG_04155	GO:0019878	lysine biosynthetic process via aminoadipic acid	9	3	FGRAMPH1_01G20869,FGRAMPH1_01G20959,FGRAMPH1_01G21959,	33.3	5.59	7.92	0.01351	0.12931	1
FGSG_06290	GO:0009064	glutamine family amino acid metabolic process	54	8	FGRAMPH1_01G06867,FGRAMPH1_01G11459,FGRAMPH1_01G11989,FGRAMPH1_01G14529,FGRAMPH1_01G20357,FGRAMPH1_01G21961,FGRAMPH1_01G26395,FGRAMPH1_01G26617,	14.8	2.48	2.77	0.0139352	0.132032	1
FGSG_13033	GO:1901615	organic hydroxy compound metabolic process	102	12	FGRAMPH1_01G03723,FGRAMPH1_01G06005,FGRAMPH1_01G07527,FGRAMPH1_01G08071,FGRAMPH1_01G11303,FGRAMPH1_01G12417,FGRAMPH1_01G12649,FGRAMPH1_01G19063,FGRAMPH1_01G23179,FGRAMPH1_01G24501,FGRAMPH1_01G27519,FGRAMPH1_01G27691,	11.8	1.97	2.13	0.0178885	0.167794	1
FGSG_12138	GO:0006749	glutathione metabolic process	10	3	FGRAMPH1_01G01149,FGRAMPH1_01G02925,FGRAMPH1_01G24277,	30	5.03	6.79	0.0184575	0.169203	1
FGSG_02502	GO:0019321	pentose metabolic process	10	3	FGRAMPH1_01G13769,FGRAMPH1_01G22335,FGRAMPH1_01G25243,	30	5.03	6.79	0.0184575	0.169203	1
FGSG_01553	GO:0071704	organic substance metabolic process	2781	188	FGRAMPH1_01G00053,FGRAMPH1_01G00473,FGRAMPH1_01G00503,FGRAMPH1_01G00867,FGRAMPH1_01G01095,FGRAMPH1_01G01149,FGRAMPH1_01G01453,FGRAMPH1_01G01533,FGRAMPH1_01G01751,FGRAMPH1_01G02019,FGRAMPH1_01G02461,FGRAMPH1_01G02925,FGRAMPH1_01G02945,FGRAMPH1_01G02989,FGRAMPH1_01G03723,FGRAMPH1_01G03899,FGRAMPH1_01G03917,FGRAMPH1_01G04271,FGRAMPH1_01G04425,FGRAMPH1_01G04529,FGRAMPH1_01G04633,FGRAMPH1_01G04967,FGR…	6.8	1.13	1.22	0.0185799	0.169203	1
FGSG_04117	GO:0006066	alcohol metabolic process	68	9	FGRAMPH1_01G03723,FGRAMPH1_01G06005,FGRAMPH1_01G07527,FGRAMPH1_01G08071,FGRAMPH1_01G11303,FGRAMPH1_01G12417,FGRAMPH1_01G23179,FGRAMPH1_01G24501,FGRAMPH1_01G27691,	13.2	2.22	2.43	0.0189291	0.170624	1
FGSG_20056	GO:0046487	glyoxylate metabolic process	4	2	FGRAMPH1_01G06785,FGRAMPH1_01G10605,	50	8.39	15.83	0.0196454	0.170624	1
FGSG_20084	GO:0006083	acetate metabolic process	4	2	FGRAMPH1_01G00867,FGRAMPH1_01G09513,	50	8.39	15.83	0.0196454	0.170624	1
FGSG_20054	GO:0001558	regulation of cell growth	4	2	FGRAMPH1_01G02925,FGRAMPH1_01G11309,	50	8.39	15.83	0.0196454	0.170624	1
FGSG_20083	GO:0000463	maturation of LSU-rRNA from tricistronic rRNA transcript (SSU-rRNA, 5.8S rRNA, LSU-rRNA)	4	2	FGRAMPH1_01G01751,FGRAMPH1_01G06103,	50	8.39	15.83	0.0196454	0.170624	1
FGSG_06919	GO:0055065	metal ion homeostasis	37	6	FGRAMPH1_01G01375,FGRAMPH1_01G05431,FGRAMPH1_01G13601,FGRAMPH1_01G17241,FGRAMPH1_01G21059,FGRAMPH1_01G25331,	16.2	2.72	3.08	0.0209403	0.180202	1
FGSG_01217	GO:0006508	proteolysis	247	23	FGRAMPH1_01G02019,FGRAMPH1_01G05171,FGRAMPH1_01G05227,FGRAMPH1_01G05315,FGRAMPH1_01G07417,FGRAMPH1_01G08489,FGRAMPH1_01G08909,FGRAMPH1_01G09337,FGRAMPH1_01G11987,FGRAMPH1_01G12095,FGRAMPH1_01G15221,FGRAMPH1_01G15517,FGRAMPH1_01G16679,FGRAMPH1_01G20941,FGRAMPH1_01G21371,FGRAMPH1_01G21605,FGRAMPH1_01G21625,FGRAMPH1_01G21997,FGRAMPH1_01G22149,FGRAMPH1_01G22547,FGRAMPH1_01G25637,FGRAMPH1_01G25857,FGR…	9.3	1.56	1.65	0.0220395	0.187937	1
FGSG_05108	GO:0042254	ribosome biogenesis	130	14	FGRAMPH1_01G01751,FGRAMPH1_01G04529,FGRAMPH1_01G06103,FGRAMPH1_01G07041,FGRAMPH1_01G07777,FGRAMPH1_01G17655,FGRAMPH1_01G19651,FGRAMPH1_01G20773,FGRAMPH1_01G20849,FGRAMPH1_01G23641,FGRAMPH1_01G23673,FGRAMPH1_01G24371,FGRAMPH1_01G24867,FGRAMPH1_01G26257,	10.8	1.81	1.93	0.0225627	0.190665	1
FGSG_05176	GO:0045454	cell redox homeostasis	19	4	FGRAMPH1_01G09063,FGRAMPH1_01G10547,FGRAMPH1_01G12245,FGRAMPH1_01G26587,	21.1	3.53	4.23	0.0236669	0.197998	1
FGSG_05352	GO:0034033	purine nucleoside bisphosphate biosynthetic process	11	3	FGRAMPH1_01G00867,FGRAMPH1_01G05453,FGRAMPH1_01G10555,	27.3	4.57	5.94	0.0242748	0.197998	1
FGSG_02691	GO:0034030	ribonucleoside bisphosphate biosynthetic process	11	3	FGRAMPH1_01G00867,FGRAMPH1_01G05453,FGRAMPH1_01G10555,	27.3	4.57	5.94	0.0242748	0.197998	1
FGSG_09390	GO:0033866	nucleoside bisphosphate biosynthetic process	11	3	FGRAMPH1_01G00867,FGRAMPH1_01G05453,FGRAMPH1_01G10555,	27.3	4.57	5.94	0.0242748	0.197998	1
FGSG_03554	GO:0006575	cellular modified amino acid metabolic process	39	6	FGRAMPH1_01G01149,FGRAMPH1_01G02925,FGRAMPH1_01G11593,FGRAMPH1_01G19959,FGRAMPH1_01G23497,FGRAMPH1_01G24277,	15.4	2.58	2.89	0.0265982	0.215079	1
FGSG_05336	GO:1901605	alpha-amino acid metabolic process	160	16	FGRAMPH1_01G01533,FGRAMPH1_01G02925,FGRAMPH1_01G06867,FGRAMPH1_01G07333,FGRAMPH1_01G09735,FGRAMPH1_01G11459,FGRAMPH1_01G11989,FGRAMPH1_01G14529,FGRAMPH1_01G19959,FGRAMPH1_01G20357,FGRAMPH1_01G20869,FGRAMPH1_01G20959,FGRAMPH1_01G21959,FGRAMPH1_01G21961,FGRAMPH1_01G26395,FGRAMPH1_01G26617,	10	1.68	1.78	0.0288798	0.230049	1
FGSG_10304	GO:0006811	ion transport	240	22	FGRAMPH1_01G01375,FGRAMPH1_01G04343,FGRAMPH1_01G04415,FGRAMPH1_01G05211,FGRAMPH1_01G05431,FGRAMPH1_01G09161,FGRAMPH1_01G10305,FGRAMPH1_01G11725,FGRAMPH1_01G12341,FGRAMPH1_01G12947,FGRAMPH1_01G13601,FGRAMPH1_01G14013,FGRAMPH1_01G14189,FGRAMPH1_01G14921,FGRAMPH1_01G15765,FGRAMPH1_01G16541,FGRAMPH1_01G17241,FGRAMPH1_01G17781,FGRAMPH1_01G18989,FGRAMPH1_01G20055,FGRAMPH1_01G21059,FGRAMPH1_01G25331,	9.2	1.54	1.62	0.0289401	0.230049	1
FGSG_07685	GO:0098771	inorganic ion homeostasis	40	6	FGRAMPH1_01G01375,FGRAMPH1_01G05431,FGRAMPH1_01G13601,FGRAMPH1_01G17241,FGRAMPH1_01G21059,FGRAMPH1_01G25331,	15	2.52	2.8	0.0297732	0.230489	1
FGSG_00165	GO:0055080	cation homeostasis	40	6	FGRAMPH1_01G01375,FGRAMPH1_01G05431,FGRAMPH1_01G13601,FGRAMPH1_01G17241,FGRAMPH1_01G21059,FGRAMPH1_01G25331,	15	2.52	2.8	0.0297732	0.230489	1
FGSG_03346	GO:0050801	ion homeostasis	40	6	FGRAMPH1_01G01375,FGRAMPH1_01G05431,FGRAMPH1_01G13601,FGRAMPH1_01G17241,FGRAMPH1_01G21059,FGRAMPH1_01G25331,	15	2.52	2.8	0.0297732	0.230489	1
FGSG_13028	GO:0019725	cellular homeostasis	62	8	FGRAMPH1_01G05431,FGRAMPH1_01G09063,FGRAMPH1_01G10547,FGRAMPH1_01G12245,FGRAMPH1_01G13601,FGRAMPH1_01G21059,FGRAMPH1_01G25331,FGRAMPH1_01G26587,	12.9	2.16	2.36	0.0299783	0.230489	1
FGSG_20049	GO:0001525	angiogenesis	5	2	FGRAMPH1_01G06721,FGRAMPH1_01G10565,	40	6.71	10.55	0.0314587	0.230533	1
FGSG_20074	GO:1901701	cellular response to oxygen-containing compound	5	2	FGRAMPH1_01G20441,FGRAMPH1_01G22905,	40	6.71	10.55	0.0314587	0.230533	1
FGSG_20052	GO:0006207	de novo' pyrimidine nucleobase biosynthetic process	5	2	FGRAMPH1_01G24019,FGRAMPH1_01G26617,	40	6.71	10.55	0.0314587	0.230533	1
FGSG_20047	GO:0006531	aspartate metabolic process	5	2	FGRAMPH1_01G20357,FGRAMPH1_01G26395,	40	6.71	10.55	0.0314587	0.230533	1
FGSG_20050	GO:0000470	maturation of LSU-rRNA	5	2	FGRAMPH1_01G01751,FGRAMPH1_01G06103,	40	6.71	10.55	0.0314587	0.230533	1
FGSG_08312	GO:0045926	negative regulation of growth	5	2	FGRAMPH1_01G02925,FGRAMPH1_01G11309,	40	6.71	10.55	0.0314587	0.230533	1
FGSG_00257	GO:0006629	lipid metabolic process	302	26	FGRAMPH1_01G00053,FGRAMPH1_01G03917,FGRAMPH1_01G05023,FGRAMPH1_01G06005,FGRAMPH1_01G07999,FGRAMPH1_01G08071,FGRAMPH1_01G09513,FGRAMPH1_01G10989,FGRAMPH1_01G11303,FGRAMPH1_01G13111,FGRAMPH1_01G14013,FGRAMPH1_01G15653,FGRAMPH1_01G16807,FGRAMPH1_01G16829,FGRAMPH1_01G17255,FGRAMPH1_01G18285,FGRAMPH1_01G19051,FGRAMPH1_01G19063,FGRAMPH1_01G22079,FGRAMPH1_01G23069,FGRAMPH1_01G23179,FGRAMPH1_01G24501,FGR…	8.6	1.44	1.51	0.0371151	0.269876	1
FGSG_04410	GO:0001732	formation of cytoplasmic translation initiation complex	13	3	FGRAMPH1_01G18739,FGRAMPH1_01G20017,FGRAMPH1_01G24313,	23.1	3.87	4.75	0.0385119	0.275814	1
FGSG_04407	GO:0009112	nucleobase metabolic process	22	4	FGRAMPH1_01G14551,FGRAMPH1_01G19243,FGRAMPH1_01G24019,FGRAMPH1_01G26617,	18.2	3.05	3.52	0.038814	0.275814	1
FGSG_11326	GO:0046916	cellular transition metal ion homeostasis	22	4	FGRAMPH1_01G05431,FGRAMPH1_01G13601,FGRAMPH1_01G21059,FGRAMPH1_01G25331,	18.2	3.05	3.52	0.038814	0.275814	1
FGSG_04392	GO:0044255	cellular lipid metabolic process	221	20	FGRAMPH1_01G00053,FGRAMPH1_01G03917,FGRAMPH1_01G06005,FGRAMPH1_01G07999,FGRAMPH1_01G08071,FGRAMPH1_01G09513,FGRAMPH1_01G10989,FGRAMPH1_01G11303,FGRAMPH1_01G13111,FGRAMPH1_01G14013,FGRAMPH1_01G15653,FGRAMPH1_01G16807,FGRAMPH1_01G17255,FGRAMPH1_01G18285,FGRAMPH1_01G19063,FGRAMPH1_01G23069,FGRAMPH1_01G23179,FGRAMPH1_01G26431,FGRAMPH1_01G27519,FGRAMPH1_01G27691,	9	1.52	1.59	0.0404905	0.285565	1
FGSG_07262	GO:0044238	primary metabolic process	2551	170	FGRAMPH1_01G00053,FGRAMPH1_01G00473,FGRAMPH1_01G00503,FGRAMPH1_01G00867,FGRAMPH1_01G01453,FGRAMPH1_01G01533,FGRAMPH1_01G01751,FGRAMPH1_01G02019,FGRAMPH1_01G02925,FGRAMPH1_01G02945,FGRAMPH1_01G03723,FGRAMPH1_01G03899,FGRAMPH1_01G03917,FGRAMPH1_01G04271,FGRAMPH1_01G04425,FGRAMPH1_01G04529,FGRAMPH1_01G04633,FGRAMPH1_01G04967,FGRAMPH1_01G04993,FGRAMPH1_01G05023,FGRAMPH1_01G05171,FGRAMPH1_01G05227,FGR…	6.7	1.12	1.19	0.0431507	0.292042	1
FGSG_20080	GO:0008150	biological process	5316	336	FGRAMPH1_01G00053,FGRAMPH1_01G00223,FGRAMPH1_01G00473,FGRAMPH1_01G00503,FGRAMPH1_01G00693,FGRAMPH1_01G00843,FGRAMPH1_01G00867,FGRAMPH1_01G01095,FGRAMPH1_01G01149,FGRAMPH1_01G01311,FGRAMPH1_01G01375,FGRAMPH1_01G01453,FGRAMPH1_01G01533,FGRAMPH1_01G01655,FGRAMPH1_01G01751,FGRAMPH1_01G01761,FGRAMPH1_01G01929,FGRAMPH1_01G02019,FGRAMPH1_01G02103,FGRAMPH1_01G02461,FGRAMPH1_01G02647,FGRAMPH1_01G02925,FGR…	6.3	1.06	1.18	0.043188	0.292042	1
FGSG_06463	GO:0046688	response to copper ion	6	2	FGRAMPH1_01G04993,FGRAMPH1_01G11377,	33.3	5.59	7.91	0.0453476	0.292042	1
FGSG_07631	GO:0006206	pyrimidine nucleobase metabolic process	6	2	FGRAMPH1_01G24019,FGRAMPH1_01G26617,	33.3	5.59	7.91	0.0453476	0.292042	1
FGSG_06445	GO:0019856	pyrimidine nucleobase biosynthetic process	6	2	FGRAMPH1_01G24019,FGRAMPH1_01G26617,	33.3	5.59	7.91	0.0453476	0.292042	1
FGSG_11129	GO:0002183	cytoplasmic translational initiation	14	3	FGRAMPH1_01G18739,FGRAMPH1_01G20017,FGRAMPH1_01G24313,	21.4	3.59	4.32	0.0469038	0.292042	1
FGSG_06720	GO:0006084	acetyl-CoA metabolic process	14	3	FGRAMPH1_01G00867,FGRAMPH1_01G08071,FGRAMPH1_01G19063,	21.4	3.59	4.32	0.0469038	0.292042	1
FGSG_04876
FGSG_00571
FGSG_11878
FGSG_07775
FGSG_04077
FGSG_11184
FGSG_02025
FGSG_05906
FGSG_11472
FGSG_01026
FGSG_08253
FGSG_07274
FGSG_03269
FGSG_03347
FGSG_06059
FGSG_00028
FGSG_10156
FGSG_02542
FGSG_05594
FGSG_02077
FGSG_04130
FGSG_03700
FGSG_03662
FGSG_04452
FGSG_03123
FGSG_08844
FGSG_08407
FGSG_00071
FGSG_03535
FGSG_07896
FGSG_10855
FGSG_10397
FGSG_03543
FGSG_00007
FGSG_03537
FGSG_02202
FGSG_10677
FGSG_08687
FGSG_05042
FGSG_03539
FGSG_07863
FGSG_07562
FGSG_03189
FGSG_01770
FGSG_10990
FGSG_01771
FGSG_00539
FGSG_03184
FGSG_01596
FGSG_01765
FGSG_01523
FGSG_05847
FGSG_11395
FGSG_03540
FGSG_04975
FGSG_04596
FGSG_10542
FGSG_10962
FGSG_03695
FGSG_10776
FGSG_02087
FGSG_03466
FGSG_06506
FGSG_00979
FGSG_03599
FGSG_09304
FGSG_03632
FGSG_02966
FGSG_08809
FGSG_01866
FGSG_04590
FGSG_05983
FGSG_12119
FGSG_00330
FGSG_11097
FGSG_11098
FGSG_05357
FGSG_11099
FGSG_06784
FGSG_09493
FGSG_06469
FGSG_10595
FGSG_11164
FGSG_11046
FGSG_06235
FGSG_03467
FGSG_09451
FGSG_08012
FGSG_11294
FGSG_11303
FGSG_05046
FGSG_03715
FGSG_08684
FGSG_03530
FGSG_04013
FGSG_03483
FGSG_10185
FGSG_03113
FGSG_03148
FGSG_09827
FGSG_11258
FGSG_09266
FGSG_02315
FGSG_01585
FGSG_03968
FGSG_03987
FGSG_03061
FGSG_11397
FGSG_08077
FGSG_05942
FGSG_11047
FGSG_01744
FGSG_13194
FGSG_08946
FGSG_06127
FGSG_03430
FGSG_03908
FGSG_05663
FGSG_13878
FGSG_11399
FGSG_03494
FGSG_12937
FGSG_10999
FGSG_12555
FGSG_04676
FGSG_12112
FGSG_07188
FGSG_04637
FGSG_04591
FGSG_09205
FGSG_13939
FGSG_03934
FGSG_12485
FGSG_09382
FGSG_09321
FGSG_09834
FGSG_11029
FGSG_03245
FGSG_03190
FGSG_13000
FGSG_07622
FGSG_08002
FGSG_05824
FGSG_10993
FGSG_11494
FGSG_03011
FGSG_13954
FGSG_10224
FGSG_04335
FGSG_10974
FGSG_09085
FGSG_03144
FGSG_10022
FGSG_00342
FGSG_12666
FGSG_01818
FGSG_03867
FGSG_07866
FGSG_08459
FGSG_01755
FGSG_09722
FGSG_10982
FGSG_07478
FGSG_05720
FGSG_14015
FGSG_12108
FGSG_11008
FGSG_02814
FGSG_06452
FGSG_06993
FGSG_00443
FGSG_02428
FGSG_07988
FGSG_02467
FGSG_03787
FGSG_08048
FGSG_03518
FGSG_03424
FGSG_11398
FGSG_01882
FGSG_00806
FGSG_02839
FGSG_04741
FGSG_08309
FGSG_09367
FGSG_03745
FGSG_03585
FGSG_09955
FGSG_04922
FGSG_11249
FGSG_03598
FGSG_03628
FGSG_11495
FGSG_11079
FGSG_11304
FGSG_10543
FGSG_06497
FGSG_03340
FGSG_00563
FGSG_06328
FGSG_02059
FGSG_11298
FGSG_11049
FGSG_10279
FGSG_09291
FGSG_07625
FGSG_03747
FGSG_10424
FGSG_08609
FGSG_10746
FGSG_02632
FGSG_04293
FGSG_08851
FGSG_02360
FGSG_05371
FGSG_00765
FGSG_11396
FGSG_03247
FGSG_02866
FGSG_09373
FGSG_03163
FGSG_03049
FGSG_11305
FGSG_10206
FGSG_09896
FGSG_09990
FGSG_02875
FGSG_01789
FGSG_02082
FGSG_00515
FGSG_07793
FGSG_06566
FGSG_11169
FGSG_03336
FGSG_07543
FGSG_08252
FGSG_03335
FGSG_11190
FGSG_13834
FGSG_04872
FGSG_03629
FGSG_12206
FGSG_11478
FGSG_04149
FGSG_06575
FGSG_07908
FGSG_06744
FGSG_09462
FGSG_03002
FGSG_07350
FGSG_05461
FGSG_06681
FGSG_12166
FGSG_09353
FGSG_08686
FGSG_01757
FGSG_05929
FGSG_11037
FGSG_03406
FGSG_11348
FGSG_02920
FGSG_09886
FGSG_03795
FGSG_06613
FGSG_06017
FGSG_11027
FGSG_03529
FGSG_00288
FGSG_04333
FGSG_12821
FGSG_03436
FGSG_08620
FGSG_00301
FGSG_03124
FGSG_12534
FGSG_13718
FGSG_11618
FGSG_03883
FGSG_00917
FGSG_02163
FGSG_00657
FGSG_03911
FGSG_00184
FGSG_06545
FGSG_03638
FGSG_11208
FGSG_01461
FGSG_01169
FGSG_04234
FGSG_11114
FGSG_13536
FGSG_00209
FGSG_06918
FGSG_02681
FGSG_05882
FGSG_04994
FGSG_01177
FGSG_08571
FGSG_04580
FGSG_05747
FGSG_07695
FGSG_00642
FGSG_11411
FGSG_03248
FGSG_02783
FGSG_11366
FGSG_01872
FGSG_03922
FGSG_11300
FGSG_09739
FGSG_11112
FGSG_12573
FGSG_09830
FGSG_07137
FGSG_01594
FGSG_03175
FGSG_02516
FGSG_04560
FGSG_09521
FGSG_06397
FGSG_04575
FGSG_04615
FGSG_07108
FGSG_11568
FGSG_12648
FGSG_01580
FGSG_08391
FGSG_07794
FGSG_09093
FGSG_12282
FGSG_08121
FGSG_03770
FGSG_09398
FGSG_06612
FGSG_02252
FGSG_02578
FGSG_13240
FGSG_13300
FGSG_03725
FGSG_05590
FGSG_07483
FGSG_04527
FGSG_04603
FGSG_00775
FGSG_08422
FGSG_04932
FGSG_06188
FGSG_10157
FGSG_10243
FGSG_03191
FGSG_00260
FGSG_05080
FGSG_11066
FGSG_03746
FGSG_03157
FGSG_05507
FGSG_07299
FGSG_00623
FGSG_13856
FGSG_05865
FGSG_06236
FGSG_11299
FGSG_03180
FGSG_06651
FGSG_05660
FGSG_04735
FGSG_05324
FGSG_11367
FGSG_01988
FGSG_01208
FGSG_09197
FGSG_02560
FGSG_06016
FGSG_11080
FGSG_03378
FGSG_11033
FGSG_06618
FGSG_05164
FGSG_08266
FGSG_13700
FGSG_10011
FGSG_11339
FGSG_03448
FGSG_07309
FGSG_10207
FGSG_01819
FGSG_07080
FGSG_07224
FGSG_02434
FGSG_12764
FGSG_06504
FGSG_06866
FGSG_06671
FGSG_09325
FGSG_01918
FGSG_13689
FGSG_01466
FGSG_11081
FGSG_10631
FGSG_01832
FGSG_04732
FGSG_10119
FGSG_12858
FGSG_10113
FGSG_02440
FGSG_11228
FGSG_09960
FGSG_06569
FGSG_02975
FGSG_04334
FGSG_02698
FGSG_09854
FGSG_07665
FGSG_13134
FGSG_04936
FGSG_09267
FGSG_11168
FGSG_09475
FGSG_04528
FGSG_02204
FGSG_06805
FGSG_03813
FGSG_12415
FGSG_08546
FGSG_03624
FGSG_08270
FGSG_01491
FGSG_12851
FGSG_09821
FGSG_06812
FGSG_05523
FGSG_07052
FGSG_09052
FGSG_08579
FGSG_10598
FGSG_08700
FGSG_02155
FGSG_06315
FGSG_09354
FGSG_05683
FGSG_11183
FGSG_07131
FGSG_12934
FGSG_07639
FGSG_06440
FGSG_13979
FGSG_05052
FGSG_01980
FGSG_13881
FGSG_02069
FGSG_05385
FGSG_00604
FGSG_02070
FGSG_08695
FGSG_09136
FGSG_07772
FGSG_13111
FGSG_03199
FGSG_12605
FGSG_07275
FGSG_06537
FGSG_06972
FGSG_01633
FGSG_04431
FGSG_01833
FGSG_03104
FGSG_06261
FGSG_10001
FGSG_12016
FGSG_00720
FGSG_02169
FGSG_13575
FGSG_11487
FGSG_07457
FGSG_03149
FGSG_01603
FGSG_11428
FGSG_02978
FGSG_05409
FGSG_10326
FGSG_06313
FGSG_07067
FGSG_09563
FGSG_06701
FGSG_07315
FGSG_04985
FGSG_01330
FGSG_01228
FGSG_05933
FGSG_08680
FGSG_08352
FGSG_03379
FGSG_09555
FGSG_02240
FGSG_03462
FGSG_03600
FGSG_11254
FGSG_07130
FGSG_08610
FGSG_04151
FGSG_08677
FGSG_11811
FGSG_10065
FGSG_09476
FGSG_12111
FGSG_02851
FGSG_12179
FGSG_09404
FGSG_10025
FGSG_06590
FGSG_09812
FGSG_05919
FGSG_04911
FGSG_13540
FGSG_11794
FGSG_01547
FGSG_06794
FGSG_03904
FGSG_13938
FGSG_06466
FGSG_03744
FGSG_05279
FGSG_02147
FGSG_05593
FGSG_01188
FGSG_09418
FGSG_00495
FGSG_08196
FGSG_03526
FGSG_00318
FGSG_13616
FGSG_07082
FGSG_09795
FGSG_07414
FGSG_06605
FGSG_07838
FGSG_00964
FGSG_12669
FGSG_09956
FGSG_10077
FGSG_05908
FGSG_04390
FGSG_03743

## Sheet: Down DEGs GO(FL)
	Gene ontology(GO) enrichment analysis of total downregulated DEGs in Fielder
Gene list	ID	Name	Bgd count	Result count	Result gene list	Pct of bgd	Fold enrichment	Odds ratio	P-value	Benjamini	Bonferroni
FGSG_05443	GO:0055085	transmembrane transport	703	34	FGRAMPH1_01G00215,FGRAMPH1_01G00221,FGRAMPH1_01G01353,FGRAMPH1_01G01455,FGRAMPH1_01G03893,FGRAMPH1_01G04167,FGRAMPH1_01G04995,FGRAMPH1_01G05051,FGRAMPH1_01G05463,FGRAMPH1_01G05483,FGRAMPH1_01G05667,FGRAMPH1_01G06339,FGRAMPH1_01G09803,FGRAMPH1_01G11287,FGRAMPH1_01G11967,FGRAMPH1_01G12089,FGRAMPH1_01G12163,FGRAMPH1_01G13917,FGRAMPH1_01G16547,FGRAMPH1_01G16877,FGRAMPH1_01G17515,FGRAMPH1_01G18239,FGR…	4.8	3.31	4.31	2.12465e-10	8.43485e-08	8.43485e-08
FGSG_09969	GO:0006633	fatty acid biosynthetic process	20	6	FGRAMPH1_01G17615,FGRAMPH1_01G17619,FGRAMPH1_01G18755,FGRAMPH1_01G19703,FGRAMPH1_01G22635,FGRAMPH1_01G25911,	30	20.56	30.31	2.81547e-07	3.93218e-05	0.000111774
FGSG_10281	GO:0072330	monocarboxylic acid biosynthetic process	32	7	FGRAMPH1_01G17615,FGRAMPH1_01G17619,FGRAMPH1_01G18755,FGRAMPH1_01G19703,FGRAMPH1_01G22385,FGRAMPH1_01G22635,FGRAMPH1_01G25911,	21.9	14.99	19.94	2.97142e-07	3.93218e-05	0.000117965
FGSG_05704	GO:0006636	unsaturated fatty acid biosynthetic process	3	3	FGRAMPH1_01G18755,FGRAMPH1_01G19703,FGRAMPH1_01G25911,	100	68.52	inf	3.03659e-06	0.000301381	0.00120552
FGSG_06688	GO:0006810	transport	1174	36	FGRAMPH1_01G00215,FGRAMPH1_01G00221,FGRAMPH1_01G01353,FGRAMPH1_01G01455,FGRAMPH1_01G03893,FGRAMPH1_01G04167,FGRAMPH1_01G04995,FGRAMPH1_01G05051,FGRAMPH1_01G05463,FGRAMPH1_01G05483,FGRAMPH1_01G05667,FGRAMPH1_01G06339,FGRAMPH1_01G09803,FGRAMPH1_01G11287,FGRAMPH1_01G11967,FGRAMPH1_01G12089,FGRAMPH1_01G12163,FGRAMPH1_01G13917,FGRAMPH1_01G15915,FGRAMPH1_01G16547,FGRAMPH1_01G16877,FGRAMPH1_01G17515,FGR…	3.1	2.1	2.58	7.35282e-06	0.00053006	0.00291907
FGSG_07467	GO:0051234	establishment of localization	1181	36	FGRAMPH1_01G00215,FGRAMPH1_01G00221,FGRAMPH1_01G01353,FGRAMPH1_01G01455,FGRAMPH1_01G03893,FGRAMPH1_01G04167,FGRAMPH1_01G04995,FGRAMPH1_01G05051,FGRAMPH1_01G05463,FGRAMPH1_01G05483,FGRAMPH1_01G05667,FGRAMPH1_01G06339,FGRAMPH1_01G09803,FGRAMPH1_01G11287,FGRAMPH1_01G11967,FGRAMPH1_01G12089,FGRAMPH1_01G12163,FGRAMPH1_01G13917,FGRAMPH1_01G15915,FGRAMPH1_01G16547,FGRAMPH1_01G16877,FGRAMPH1_01G17515,FGR…	3	2.09	2.56	8.42371e-06	0.00053006	0.00334421
FGSG_13534	GO:0032787	monocarboxylic acid metabolic process	98	9	FGRAMPH1_01G14117,FGRAMPH1_01G17615,FGRAMPH1_01G17619,FGRAMPH1_01G18755,FGRAMPH1_01G19703,FGRAMPH1_01G22385,FGRAMPH1_01G22635,FGRAMPH1_01G23087,FGRAMPH1_01G25911,	9.2	6.29	7.27	1.19252e-05	0.00053006	0.0047343
FGSG_09127	GO:0015696	ammonium transport	4	3	FGRAMPH1_01G01353,FGRAMPH1_01G05051,FGRAMPH1_01G11967,	75	51.39	207.41	1.20165e-05	0.00053006	0.00477054
FGSG_02358	GO:0072488	ammonium transmembrane transport	4	3	FGRAMPH1_01G01353,FGRAMPH1_01G05051,FGRAMPH1_01G11967,	75	51.39	207.41	1.20165e-05	0.00053006	0.00477054
FGSG_06480	GO:0051179	localization	1220	36	FGRAMPH1_01G00215,FGRAMPH1_01G00221,FGRAMPH1_01G01353,FGRAMPH1_01G01455,FGRAMPH1_01G03893,FGRAMPH1_01G04167,FGRAMPH1_01G04995,FGRAMPH1_01G05051,FGRAMPH1_01G05463,FGRAMPH1_01G05483,FGRAMPH1_01G05667,FGRAMPH1_01G06339,FGRAMPH1_01G09803,FGRAMPH1_01G11287,FGRAMPH1_01G11967,FGRAMPH1_01G12089,FGRAMPH1_01G12163,FGRAMPH1_01G13917,FGRAMPH1_01G15915,FGRAMPH1_01G16547,FGRAMPH1_01G16877,FGRAMPH1_01G17515,FGR…	3	2.02	2.47	1.7533e-05	0.000681492	0.00696061
FGSG_12178	GO:0006631	fatty acid metabolic process	39	6	FGRAMPH1_01G17615,FGRAMPH1_01G17619,FGRAMPH1_01G18755,FGRAMPH1_01G19703,FGRAMPH1_01G22635,FGRAMPH1_01G25911,	15.4	10.54	12.83	1.88826e-05	0.000681492	0.00749641
FGSG_04439	GO:0033559	unsaturated fatty acid metabolic process	5	3	FGRAMPH1_01G18755,FGRAMPH1_01G19703,FGRAMPH1_01G25911,	60	41.11	103.69	2.97202e-05	0.000983242	0.0117989
FGSG_05859	GO:0008610	lipid biosynthetic process	146	10	FGRAMPH1_01G15609,FGRAMPH1_01G17007,FGRAMPH1_01G17231,FGRAMPH1_01G17615,FGRAMPH1_01G17619,FGRAMPH1_01G18755,FGRAMPH1_01G19703,FGRAMPH1_01G22635,FGRAMPH1_01G22921,FGRAMPH1_01G25911,	6.8	4.69	5.3	5.09255e-05	0.00155519	0.0202174
FGSG_06741	GO:0006865	amino acid transport	35	5	FGRAMPH1_01G05463,FGRAMPH1_01G18239,FGRAMPH1_01G18933,FGRAMPH1_01G22363,FGRAMPH1_01G28033,	14.3	9.79	11.67	0.000139853	0.00396583	0.0555217
FGSG_00070	GO:0015755	fructose transmembrane transport	2	2	FGRAMPH1_01G03893,FGRAMPH1_01G13917,	100	68.52	inf	0.000211332	0.00466104	0.0838988
FGSG_02070	GO:0015756	fucose transmembrane transport	2	2	FGRAMPH1_01G03893,FGRAMPH1_01G13917,	100	68.52	inf	0.000211332	0.00466104	0.0838988
FGSG_11573	GO:0015751	arabinose transmembrane transport	2	2	FGRAMPH1_01G03893,FGRAMPH1_01G13917,	100	68.52	inf	0.000211332	0.00466104	0.0838988
FGSG_00068	GO:0015750	pentose transmembrane transport	2	2	FGRAMPH1_01G03893,FGRAMPH1_01G13917,	100	68.52	inf	0.000211332	0.00466104	0.0838988
FGSG_02321	GO:0046394	carboxylic acid biosynthetic process	146	9	FGRAMPH1_01G07679,FGRAMPH1_01G11061,FGRAMPH1_01G17615,FGRAMPH1_01G17619,FGRAMPH1_01G18755,FGRAMPH1_01G19703,FGRAMPH1_01G22385,FGRAMPH1_01G22635,FGRAMPH1_01G25911,	6.2	4.22	4.7	0.000271951	0.00568235	0.107965
FGSG_04571	GO:0008643	carbohydrate transport	63	6	FGRAMPH1_01G01455,FGRAMPH1_01G03893,FGRAMPH1_01G05667,FGRAMPH1_01G06339,FGRAMPH1_01G13917,FGRAMPH1_01G21067,	9.5	6.53	7.41	0.000295457	0.00586482	0.117296
FGSG_10440	GO:0016053	organic acid biosynthetic process	151	9	FGRAMPH1_01G07679,FGRAMPH1_01G11061,FGRAMPH1_01G17615,FGRAMPH1_01G17619,FGRAMPH1_01G18755,FGRAMPH1_01G19703,FGRAMPH1_01G22385,FGRAMPH1_01G22635,FGRAMPH1_01G25911,	6	4.08	4.53	0.000349342	0.00660422	0.138689
FGSG_07833	GO:0015757	galactose transmembrane transport	3	2	FGRAMPH1_01G03893,FGRAMPH1_01G13917,	66.7	45.68	137.17	0.000627922	0.0113311	0.249285
FGSG_00619	GO:0015849	organic acid transport	49	5	FGRAMPH1_01G05463,FGRAMPH1_01G18239,FGRAMPH1_01G18933,FGRAMPH1_01G22363,FGRAMPH1_01G28033,	10.2	6.99	7.94	0.000697862	0.0120457	0.277051
FGSG_10264	GO:0044255	cellular lipid metabolic process	221	10	FGRAMPH1_01G15609,FGRAMPH1_01G17007,FGRAMPH1_01G17231,FGRAMPH1_01G17615,FGRAMPH1_01G17619,FGRAMPH1_01G18755,FGRAMPH1_01G19703,FGRAMPH1_01G22635,FGRAMPH1_01G22921,FGRAMPH1_01G25911,	4.5	3.1	3.39	0.00142771	0.0236168	0.566803
FGSG_10507	GO:0006629	lipid metabolic process	302	12	FGRAMPH1_01G15609,FGRAMPH1_01G17007,FGRAMPH1_01G17231,FGRAMPH1_01G17615,FGRAMPH1_01G17619,FGRAMPH1_01G18755,FGRAMPH1_01G19051,FGRAMPH1_01G19345,FGRAMPH1_01G19703,FGRAMPH1_01G22635,FGRAMPH1_01G22921,FGRAMPH1_01G25911,	4	2.72	2.98	0.0014892	0.0236485	0.591212
FGSG_07136	GO:0071702	organic substance transport	403	14	FGRAMPH1_01G01455,FGRAMPH1_01G03893,FGRAMPH1_01G05463,FGRAMPH1_01G05483,FGRAMPH1_01G05667,FGRAMPH1_01G06339,FGRAMPH1_01G12089,FGRAMPH1_01G13917,FGRAMPH1_01G18239,FGRAMPH1_01G18933,FGRAMPH1_01G21067,FGRAMPH1_01G22363,FGRAMPH1_01G25977,FGRAMPH1_01G28033,	3.5	2.38	2.61	0.00217144	0.0331562	0.862062
FGSG_02692	GO:0006812	cation transport	164	8	FGRAMPH1_01G01353,FGRAMPH1_01G05051,FGRAMPH1_01G05463,FGRAMPH1_01G05483,FGRAMPH1_01G11967,FGRAMPH1_01G12089,FGRAMPH1_01G15915,FGRAMPH1_01G28033,	4.9	3.34	3.63	0.00269547	0.0396333	1
FGSG_05048	GO:0015871	choline transport	6	2	FGRAMPH1_01G05463,FGRAMPH1_01G05483,	33.3	22.84	34.28	0.00305045	0.043251	1
FGSG_01593	GO:0043562	cellular response to nitrogen levels	7	2	FGRAMPH1_01G01353,FGRAMPH1_01G11967,	28.6	19.58	27.42	0.0042299	0.0559757	1
FGSG_05906	GO:0006995	cellular response to nitrogen starvation	7	2	FGRAMPH1_01G01353,FGRAMPH1_01G11967,	28.6	19.58	27.42	0.0042299	0.0559757	1
FGSG_02326	GO:0044283	small molecule biosynthetic process	220	9	FGRAMPH1_01G07679,FGRAMPH1_01G11061,FGRAMPH1_01G17615,FGRAMPH1_01G17619,FGRAMPH1_01G18755,FGRAMPH1_01G19703,FGRAMPH1_01G22385,FGRAMPH1_01G22635,FGRAMPH1_01G25911,	4.1	2.8	3.02	0.00481462	0.0616582	1
FGSG_03955	GO:0015749	monosaccharide transmembrane transport	8	2	FGRAMPH1_01G03893,FGRAMPH1_01G13917,	25	17.13	22.85	0.00558615	0.0652265	1
FGSG_03731	GO:0034219	carbohydrate transmembrane transport	8	2	FGRAMPH1_01G03893,FGRAMPH1_01G13917,	25	17.13	22.85	0.00558615	0.0652265	1
FGSG_05095	GO:0008645	hexose transmembrane transport	8	2	FGRAMPH1_01G03893,FGRAMPH1_01G13917,	25	17.13	22.85	0.00558615	0.0652265	1
FGSG_05375	GO:0031667	response to nutrient levels	27	3	FGRAMPH1_01G01353,FGRAMPH1_01G11525,FGRAMPH1_01G11967,	11.1	7.61	8.62	0.00687543	0.077987	1
FGSG_06278	GO:0009991	response to extracellular stimulus	28	3	FGRAMPH1_01G01353,FGRAMPH1_01G11525,FGRAMPH1_01G11967,	10.7	7.34	8.27	0.00761943	0.0836321	1
FGSG_05574	GO:0045017	glycerolipid biosynthetic process	54	4	FGRAMPH1_01G15609,FGRAMPH1_01G17007,FGRAMPH1_01G17231,FGRAMPH1_01G22921,	7.4	5.08	5.54	0.00779443	0.0836321	1
FGSG_09053	GO:0006811	ion transport	240	9	FGRAMPH1_01G01353,FGRAMPH1_01G05051,FGRAMPH1_01G05463,FGRAMPH1_01G05483,FGRAMPH1_01G11967,FGRAMPH1_01G12089,FGRAMPH1_01G15915,FGRAMPH1_01G18421,FGRAMPH1_01G28033,	3.8	2.57	2.75	0.00838119	0.0875614	1
FGSG_02530	GO:0071705	nitrogen compound transport	300	10	FGRAMPH1_01G01353,FGRAMPH1_01G05051,FGRAMPH1_01G05463,FGRAMPH1_01G05483,FGRAMPH1_01G11967,FGRAMPH1_01G12089,FGRAMPH1_01G18239,FGRAMPH1_01G18933,FGRAMPH1_01G22363,FGRAMPH1_01G28033,	3.3	2.28	2.44	0.012208	0.120701	1
FGSG_13562	GO:0015840	urea transport	1	1	FGRAMPH1_01G12089,	100	68.52	inf	0.0145935	0.120701	1
FGSG_03111	GO:0019755	one-carbon compound transport	1	1	FGRAMPH1_01G12089,	100	68.52	inf	0.0145935	0.120701	1
FGSG_01712	GO:0071918	urea transmembrane transport	1	1	FGRAMPH1_01G12089,	100	68.52	inf	0.0145935	0.120701	1
FGSG_06551	GO:0045477	regulation of nurse cell apoptotic process	1	1	FGRAMPH1_01G22921,	100	68.52	inf	0.0145935	0.120701	1
FGSG_00143	GO:0031158	negative regulation of aggregate size involved in sorocarp development	1	1	FGRAMPH1_01G17925,	100	68.52	inf	0.0145935	0.120701	1
FGSG_10772	GO:1904748	regulation of apoptotic process involved in development	1	1	FGRAMPH1_01G22921,	100	68.52	inf	0.0145935	0.120701	1
FGSG_01983	GO:0046168	glycerol-3-phosphate catabolic process	1	1	FGRAMPH1_01G16903,	100	68.52	inf	0.0145935	0.120701	1
FGSG_11617	GO:2001295	malonyl-CoA biosynthetic process	1	1	FGRAMPH1_01G22635,	100	68.52	inf	0.0145935	0.120701	1
FGSG_07610	GO:2001293	malonyl-CoA metabolic process	1	1	FGRAMPH1_01G22635,	100	68.52	inf	0.0145935	0.120701	1
FGSG_03959	GO:0046486	glycerolipid metabolic process	67	4	FGRAMPH1_01G15609,FGRAMPH1_01G17007,FGRAMPH1_01G17231,FGRAMPH1_01G22921,	6	4.09	4.39	0.0163505	0.131432	1
FGSG_12857	GO:0019752	carboxylic acid metabolic process	362	11	FGRAMPH1_01G07679,FGRAMPH1_01G11061,FGRAMPH1_01G14117,FGRAMPH1_01G17615,FGRAMPH1_01G17619,FGRAMPH1_01G18755,FGRAMPH1_01G19703,FGRAMPH1_01G22385,FGRAMPH1_01G22635,FGRAMPH1_01G23087,FGRAMPH1_01G25911,	3	2.08	2.22	0.0165531	0.131432	1
FGSG_07303	GO:0043436	oxoacid metabolic process	367	11	FGRAMPH1_01G07679,FGRAMPH1_01G11061,FGRAMPH1_01G14117,FGRAMPH1_01G17615,FGRAMPH1_01G17619,FGRAMPH1_01G18755,FGRAMPH1_01G19703,FGRAMPH1_01G22385,FGRAMPH1_01G22635,FGRAMPH1_01G23087,FGRAMPH1_01G25911,	3	2.05	2.19	0.0181466	0.138926	1
FGSG_06658	GO:0043939	negative regulation of sporulation	15	2	FGRAMPH1_01G14947,FGRAMPH1_01G22431,	13.3	9.14	10.54	0.0195967	0.138926	1
FGSG_09548	GO:1903665	negative regulation of asexual reproduction	15	2	FGRAMPH1_01G14947,FGRAMPH1_01G22431,	13.3	9.14	10.54	0.0195967	0.138926	1
FGSG_00793	GO:0010721	negative regulation of cell development	15	2	FGRAMPH1_01G14947,FGRAMPH1_01G22431,	13.3	9.14	10.54	0.0195967	0.138926	1
FGSG_00067	GO:0075308	negative regulation of conidium formation	15	2	FGRAMPH1_01G14947,FGRAMPH1_01G22431,	13.3	9.14	10.54	0.0195967	0.138926	1
FGSG_10411	GO:0015695	organic cation transport	15	2	FGRAMPH1_01G05463,FGRAMPH1_01G05483,	13.3	9.14	10.54	0.0195967	0.138926	1
FGSG_06010	GO:0006082	organic acid metabolic process	375	11	FGRAMPH1_01G07679,FGRAMPH1_01G11061,FGRAMPH1_01G14117,FGRAMPH1_01G17615,FGRAMPH1_01G17619,FGRAMPH1_01G18755,FGRAMPH1_01G19703,FGRAMPH1_01G22385,FGRAMPH1_01G22635,FGRAMPH1_01G23087,FGRAMPH1_01G25911,	2.9	2.01	2.14	0.0209313	0.143792	1
FGSG_00572	GO:0042594	response to starvation	16	2	FGRAMPH1_01G01353,FGRAMPH1_01G11967,	12.5	8.57	9.78	0.0221849	0.143792	1
FGSG_12474	GO:0009267	cellular response to starvation	16	2	FGRAMPH1_01G01353,FGRAMPH1_01G11967,	12.5	8.57	9.78	0.0221849	0.143792	1
FGSG_08633	GO:0042493	response to drug	237	8	FGRAMPH1_01G05463,FGRAMPH1_01G05483,FGRAMPH1_01G06977,FGRAMPH1_01G16547,FGRAMPH1_01G16877,FGRAMPH1_01G17619,FGRAMPH1_01G18505,FGRAMPH1_01G18933,	3.4	2.31	2.45	0.0224953	0.143792	1
FGSG_03869	GO:0098655	cation transmembrane transport	74	4	FGRAMPH1_01G01353,FGRAMPH1_01G05051,FGRAMPH1_01G11967,FGRAMPH1_01G28033,	5.4	3.7	3.95	0.0227171	0.143792	1
FGSG_05322	GO:0031669	cellular response to nutrient levels	17	2	FGRAMPH1_01G01353,FGRAMPH1_01G11967,	11.8	8.06	9.13	0.0249058	0.143792	1
FGSG_06184	GO:0071496	cellular response to external stimulus	18	2	FGRAMPH1_01G01353,FGRAMPH1_01G11967,	11.1	7.61	8.56	0.0277553	0.143792	1
FGSG_06580	GO:0031668	cellular response to extracellular stimulus	18	2	FGRAMPH1_01G01353,FGRAMPH1_01G11967,	11.1	7.61	8.56	0.0277553	0.143792	1
FGSG_02264	GO:0034192	D-galactonate metabolic process	2	1	FGRAMPH1_01G14117,	50	34.26	68.05	0.0289758	0.143792	1
FGSG_05277	GO:0042759	long-chain fatty acid biosynthetic process	2	1	FGRAMPH1_01G17615,	50	34.26	68.05	0.0289758	0.143792	1
FGSG_02551	GO:0060176	regulation of aggregation involved in sorocarp development	2	1	FGRAMPH1_01G17925,	50	34.26	68.05	0.0289758	0.143792	1
FGSG_09599	GO:0046460	neutral lipid biosynthetic process	2	1	FGRAMPH1_01G22921,	50	34.26	68.05	0.0289758	0.143792	1
FGSG_12492	GO:0046463	acylglycerol biosynthetic process	2	1	FGRAMPH1_01G22921,	50	34.26	68.05	0.0289758	0.143792	1
FGSG_10969	GO:0006641	triglyceride metabolic process	2	1	FGRAMPH1_01G22921,	50	34.26	68.05	0.0289758	0.143792	1
FGSG_05798	GO:0032104	regulation of response to extracellular stimulus	2	1	FGRAMPH1_01G17925,	50	34.26	68.05	0.0289758	0.143792	1
FGSG_07495	GO:0019432	triglyceride biosynthetic process	2	1	FGRAMPH1_01G22921,	50	34.26	68.05	0.0289758	0.143792	1
FGSG_01674	GO:0034194	D-galactonate catabolic process	2	1	FGRAMPH1_01G14117,	50	34.26	68.05	0.0289758	0.143792	1
FGSG_05075	GO:0019584	galactonate catabolic process	2	1	FGRAMPH1_01G14117,	50	34.26	68.05	0.0289758	0.143792	1
FGSG_02272	GO:0032107	regulation of response to nutrient levels	2	1	FGRAMPH1_01G17925,	50	34.26	68.05	0.0289758	0.143792	1
FGSG_07917	GO:0006638	neutral lipid metabolic process	2	1	FGRAMPH1_01G22921,	50	34.26	68.05	0.0289758	0.143792	1
FGSG_01994	GO:0006639	acylglycerol metabolic process	2	1	FGRAMPH1_01G22921,	50	34.26	68.05	0.0289758	0.143792	1
FGSG_10983	GO:0006542	glutamine biosynthetic process	2	1	FGRAMPH1_01G07679,	50	34.26	68.05	0.0289758	0.143792	1
FGSG_01673	GO:0031157	regulation of aggregate size involved in sorocarp development	2	1	FGRAMPH1_01G17925,	50	34.26	68.05	0.0289758	0.143792	1
FGSG_05011	GO:0019583	galactonate metabolic process	2	1	FGRAMPH1_01G14117,	50	34.26	68.05	0.0289758	0.143792	1
FGSG_02094	GO:0045596	negative regulation of cell differentiation	19	2	FGRAMPH1_01G14947,FGRAMPH1_01G22431,	10.5	7.21	8.05	0.0307289	0.150609	1
FGSG_03063	GO:0008150	biological process	5316	88	FGRAMPH1_01G00215,FGRAMPH1_01G00217,FGRAMPH1_01G00221,FGRAMPH1_01G00381,FGRAMPH1_01G00389,FGRAMPH1_01G01353,FGRAMPH1_01G01455,FGRAMPH1_01G03131,FGRAMPH1_01G03893,FGRAMPH1_01G04071,FGRAMPH1_01G04167,FGRAMPH1_01G04995,FGRAMPH1_01G05051,FGRAMPH1_01G05463,FGRAMPH1_01G05483,FGRAMPH1_01G05597,FGRAMPH1_01G05599,FGRAMPH1_01G05667,FGRAMPH1_01G05711,FGRAMPH1_01G06119,FGRAMPH1_01G06339,FGRAMPH1_01G06751,FGR…	1.7	1.13	1.44	0.0339704	0.163218	1
FGSG_09126	GO:0034220	ion transmembrane transport	84	4	FGRAMPH1_01G01353,FGRAMPH1_01G05051,FGRAMPH1_01G11967,FGRAMPH1_01G28033,	4.8	3.26	3.45	0.0341236	0.163218	1
FGSG_13866	GO:0046474	glycerophospholipid biosynthetic process	52	3	FGRAMPH1_01G15609,FGRAMPH1_01G17007,FGRAMPH1_01G17231,	5.8	3.95	4.21	0.0399639	0.169608	1
FGSG_05321	GO:0051093	negative regulation of developmental process	22	2	FGRAMPH1_01G14947,FGRAMPH1_01G22431,	9.1	6.23	6.84	0.0403536	0.169608	1
FGSG_06493	GO:0009851	auxin biosynthetic process	3	1	FGRAMPH1_01G22385,	33.3	22.84	34.02	0.0431497	0.169608	1
FGSG_05107	GO:0006814	sodium ion transport	3	1	FGRAMPH1_01G12089,	33.3	22.84	34.02	0.0431497	0.169608	1
FGSG_10752	GO:0009684	indoleacetic acid biosynthetic process	3	1	FGRAMPH1_01G22385,	33.3	22.84	34.02	0.0431497	0.169608	1
FGSG_07061	GO:0010393	galacturonan metabolic process	3	1	FGRAMPH1_01G15293,	33.3	22.84	34.02	0.0431497	0.169608	1
FGSG_01326	GO:0009683	indoleacetic acid metabolic process	3	1	FGRAMPH1_01G22385,	33.3	22.84	34.02	0.0431497	0.169608	1
FGSG_05177	GO:0045488	pectin metabolic process	3	1	FGRAMPH1_01G15293,	33.3	22.84	34.02	0.0431497	0.169608	1
FGSG_05023	GO:0001402	signal transduction involved in filamentous growth	3	1	FGRAMPH1_01G11967,	33.3	22.84	34.02	0.0431497	0.169608	1
FGSG_00076	GO:0009850	auxin metabolic process	3	1	FGRAMPH1_01G22385,	33.3	22.84	34.02	0.0431497	0.169608	1
FGSG_02327	GO:0042446	hormone biosynthetic process	3	1	FGRAMPH1_01G22385,	33.3	22.84	34.02	0.0431497	0.169608	1
FGSG_07891	GO:0043419	urea catabolic process	3	1	FGRAMPH1_01G20789,	33.3	22.84	34.02	0.0431497	0.169608	1
FGSG_06752	GO:0034754	cellular hormone metabolic process	3	1	FGRAMPH1_01G22385,	33.3	22.84	34.02	0.0431497	0.169608	1
FGSG_09980	GO:0042545	cell wall modification	3	1	FGRAMPH1_01G15293,	33.3	22.84	34.02	0.0431497	0.169608	1
FGSG_12647	GO:0042445	hormone metabolic process	3	1	FGRAMPH1_01G22385,	33.3	22.84	34.02	0.0431497	0.169608	1
FGSG_00002	GO:0009450	gamma-aminobutyric acid catabolic process	3	1	FGRAMPH1_01G23087,	33.3	22.84	34.02	0.0431497	0.169608	1
FGSG_08375	GO:0045490	pectin catabolic process	3	1	FGRAMPH1_01G15293,	33.3	22.84	34.02	0.0431497	0.169608	1
FGSG_02550	GO:0046341	CDP-diacylglycerol metabolic process	3	1	FGRAMPH1_01G17231,	33.3	22.84	34.02	0.0431497	0.169608	1
FGSG_02641
FGSG_05784
FGSG_04296
FGSG_09524
FGSG_01224
FGSG_09749
FGSG_11439
FGSG_13412
FGSG_02379
FGSG_06987
FGSG_10913
FGSG_05154
FGSG_03577
FGSG_08172
FGSG_09297
FGSG_10191
FGSG_06676
FGSG_06287
FGSG_12737
FGSG_05682
FGSG_00140
FGSG_04879
FGSG_04207
FGSG_07522
FGSG_06473
FGSG_08456
FGSG_01764
FGSG_07485
FGSG_03230
FGSG_02883
FGSG_09723
FGSG_06725
FGSG_08440
FGSG_00971
FGSG_02880
FGSG_11520
FGSG_06985
FGSG_03679
FGSG_05066
FGSG_09293
FGSG_07584
FGSG_04135
FGSG_03142
FGSG_08875
FGSG_00725
FGSG_09881
FGSG_05653
FGSG_12726
FGSG_03312
FGSG_06333
FGSG_04988
FGSG_00529
FGSG_07890
FGSG_05904
FGSG_10006
FGSG_07889
FGSG_09718
FGSG_01557
FGSG_06514
FGSG_03432
FGSG_03442
FGSG_01263
FGSG_10260
FGSG_02942
FGSG_01478
FGSG_04194
FGSG_13711

## Sheet: Down DEGs GO(SU)
	Gene ontology(GO) enrichment analysis of total downregulated DEGs in Sumai3
Gene list	ID	Name	Bgd count	Result count	Result gene list	Pct of bgd	Fold enrichment	Odds ratio	P-value	Benjamini	Bonferroni
FGSG_07477	GO:0055085	transmembrane transport	703	57	FGRAMPH1_01G00151,FGRAMPH1_01G00221,FGRAMPH1_01G00693,FGRAMPH1_01G01085,FGRAMPH1_01G01573,FGRAMPH1_01G02387,FGRAMPH1_01G03951,FGRAMPH1_01G04167,FGRAMPH1_01G05051,FGRAMPH1_01G05323,FGRAMPH1_01G05463,FGRAMPH1_01G05483,FGRAMPH1_01G05529,FGRAMPH1_01G05589,FGRAMPH1_01G05631,FGRAMPH1_01G05667,FGRAMPH1_01G06215,FGRAMPH1_01G06339,FGRAMPH1_01G06411,FGRAMPH1_01G07861,FGRAMPH1_01G08323,FGRAMPH1_01G09723,FGR…	8.1	2.41	2.9	2.21514e-10	1.67243e-07	1.67243e-07
FGSG_02929	GO:0055114	obsolete oxidation-reduction process	895	55	FGRAMPH1_01G00155,FGRAMPH1_01G00387,FGRAMPH1_01G03805,FGRAMPH1_01G04247,FGRAMPH1_01G05203,FGRAMPH1_01G05353,FGRAMPH1_01G05481,FGRAMPH1_01G05587,FGRAMPH1_01G05599,FGRAMPH1_01G05605,FGRAMPH1_01G05711,FGRAMPH1_01G05765,FGRAMPH1_01G05781,FGRAMPH1_01G05829,FGRAMPH1_01G05841,FGRAMPH1_01G06119,FGRAMPH1_01G06607,FGRAMPH1_01G07045,FGRAMPH1_01G07527,FGRAMPH1_01G07757,FGRAMPH1_01G10025,FGRAMPH1_01G10897,FGR…	6.1	1.83	2.08	5.94021e-06	0.00224243	0.00448486
FGSG_05738	GO:0006865	amino acid transport	35	7	FGRAMPH1_01G05463,FGRAMPH1_01G09723,FGRAMPH1_01G12823,FGRAMPH1_01G13733,FGRAMPH1_01G18239,FGRAMPH1_01G18933,FGRAMPH1_01G28033,	20	5.95	7.33	0.000135548	0.025414	0.102338
FGSG_11440	GO:0006810	transport	1174	62	FGRAMPH1_01G00151,FGRAMPH1_01G00221,FGRAMPH1_01G00693,FGRAMPH1_01G01085,FGRAMPH1_01G01573,FGRAMPH1_01G01981,FGRAMPH1_01G02387,FGRAMPH1_01G03951,FGRAMPH1_01G04167,FGRAMPH1_01G05051,FGRAMPH1_01G05323,FGRAMPH1_01G05381,FGRAMPH1_01G05463,FGRAMPH1_01G05483,FGRAMPH1_01G05529,FGRAMPH1_01G05589,FGRAMPH1_01G05631,FGRAMPH1_01G05667,FGRAMPH1_01G06215,FGRAMPH1_01G06339,FGRAMPH1_01G06411,FGRAMPH1_01G07861,FGR…	5.3	1.57	1.76	0.000151731	0.025414	0.114557
FGSG_02794	GO:0051234	establishment of localization	1181	62	FGRAMPH1_01G00151,FGRAMPH1_01G00221,FGRAMPH1_01G00693,FGRAMPH1_01G01085,FGRAMPH1_01G01573,FGRAMPH1_01G01981,FGRAMPH1_01G02387,FGRAMPH1_01G03951,FGRAMPH1_01G04167,FGRAMPH1_01G05051,FGRAMPH1_01G05323,FGRAMPH1_01G05381,FGRAMPH1_01G05463,FGRAMPH1_01G05483,FGRAMPH1_01G05529,FGRAMPH1_01G05589,FGRAMPH1_01G05631,FGRAMPH1_01G05667,FGRAMPH1_01G06215,FGRAMPH1_01G06339,FGRAMPH1_01G06411,FGRAMPH1_01G07861,FGR…	5.2	1.56	1.75	0.00017961	0.025414	0.135606
FGSG_08768	GO:0015849	organic acid transport	49	8	FGRAMPH1_01G05463,FGRAMPH1_01G09723,FGRAMPH1_01G12823,FGRAMPH1_01G13733,FGRAMPH1_01G14725,FGRAMPH1_01G18239,FGRAMPH1_01G18933,FGRAMPH1_01G28033,	16.3	4.85	5.73	0.000201966	0.025414	0.152484
FGSG_08359	GO:0051179	localization	1220	63	FGRAMPH1_01G00151,FGRAMPH1_01G00221,FGRAMPH1_01G00693,FGRAMPH1_01G01085,FGRAMPH1_01G01573,FGRAMPH1_01G01981,FGRAMPH1_01G02387,FGRAMPH1_01G03951,FGRAMPH1_01G04167,FGRAMPH1_01G05051,FGRAMPH1_01G05323,FGRAMPH1_01G05381,FGRAMPH1_01G05463,FGRAMPH1_01G05483,FGRAMPH1_01G05529,FGRAMPH1_01G05589,FGRAMPH1_01G05631,FGRAMPH1_01G05667,FGRAMPH1_01G06215,FGRAMPH1_01G06339,FGRAMPH1_01G06411,FGRAMPH1_01G07861,FGR…	5.2	1.54	1.72	0.000250991	0.0270712	0.189498
FGSG_05254	GO:0009448	gamma-aminobutyric acid metabolic process	6	3	FGRAMPH1_01G18195,FGRAMPH1_01G23085,FGRAMPH1_01G23087,	50	14.87	29.02	0.0006985	0.065921	0.527368
FGSG_20049	GO:0048148	behavioral response to cocaine	2	2	FGRAMPH1_01G18195,FGRAMPH1_01G23085,	100	29.73	inf	0.00112751	0.0792273	0.851271
FGSG_20058	GO:0042220	response to cocaine	2	2	FGRAMPH1_01G18195,FGRAMPH1_01G23085,	100	29.73	inf	0.00112751	0.0792273	0.851271
FGSG_00048	GO:0008643	carbohydrate transport	63	8	FGRAMPH1_01G05529,FGRAMPH1_01G05667,FGRAMPH1_01G06339,FGRAMPH1_01G10851,FGRAMPH1_01G13917,FGRAMPH1_01G15551,FGRAMPH1_01G21329,FGRAMPH1_01G21335,	12.7	3.78	4.27	0.00115431	0.0792273	0.871501
FGSG_10019	GO:0006811	ion transport	240	17	FGRAMPH1_01G01085,FGRAMPH1_01G01573,FGRAMPH1_01G01981,FGRAMPH1_01G02387,FGRAMPH1_01G05051,FGRAMPH1_01G05463,FGRAMPH1_01G05483,FGRAMPH1_01G06215,FGRAMPH1_01G11389,FGRAMPH1_01G11529,FGRAMPH1_01G12089,FGRAMPH1_01G12823,FGRAMPH1_01G14725,FGRAMPH1_01G15485,FGRAMPH1_01G25919,FGRAMPH1_01G26337,FGRAMPH1_01G28033,	7.1	2.11	2.26	0.00298735	0.187954	1
FGSG_20047	GO:0043279	response to alkaloid	3	2	FGRAMPH1_01G18195,FGRAMPH1_01G23085,	66.7	19.82	57.85	0.00330718	0.192071	1
FGSG_06692	GO:0032787	monocarboxylic acid metabolic process	98	9	FGRAMPH1_01G00127,FGRAMPH1_01G01281,FGRAMPH1_01G02553,FGRAMPH1_01G06757,FGRAMPH1_01G18195,FGRAMPH1_01G19703,FGRAMPH1_01G22385,FGRAMPH1_01G23085,FGRAMPH1_01G23087,	9.2	2.73	2.97	0.00557989	0.271273	1
FGSG_20052	GO:0046176	aldonic acid catabolic process	4	2	FGRAMPH1_01G02553,FGRAMPH1_01G06757,	50	14.87	28.92	0.00646744	0.271273	1
FGSG_20083	GO:0072488	ammonium transmembrane transport	4	2	FGRAMPH1_01G01573,FGRAMPH1_01G05051,	50	14.87	28.92	0.00646744	0.271273	1
FGSG_20079	GO:0015696	ammonium transport	4	2	FGRAMPH1_01G01573,FGRAMPH1_01G05051,	50	14.87	28.92	0.00646744	0.271273	1
FGSG_20074	GO:0030534	adult behavior	4	2	FGRAMPH1_01G18195,FGRAMPH1_01G23085,	50	14.87	28.92	0.00646744	0.271273	1
FGSG_00059	GO:0006812	cation transport	164	12	FGRAMPH1_01G01573,FGRAMPH1_01G02387,FGRAMPH1_01G05051,FGRAMPH1_01G05463,FGRAMPH1_01G05483,FGRAMPH1_01G06215,FGRAMPH1_01G11389,FGRAMPH1_01G11529,FGRAMPH1_01G12089,FGRAMPH1_01G12823,FGRAMPH1_01G26337,FGRAMPH1_01G28033,	7.3	2.18	2.32	0.00923093	0.340388	1
FGSG_09883	GO:0006006	glucose metabolic process	14	3	FGRAMPH1_01G01281,FGRAMPH1_01G03343,FGRAMPH1_01G10353,	21.4	6.37	7.91	0.0104066	0.340388	1
FGSG_20084	GO:0019520	aldonic acid metabolic process	5	2	FGRAMPH1_01G02553,FGRAMPH1_01G06757,	40	11.89	19.28	0.0105403	0.340388	1
FGSG_05255	GO:0042886	amide transport	15	3	FGRAMPH1_01G08323,FGRAMPH1_01G10525,FGRAMPH1_01G12089,	20	5.95	7.25	0.0126894	0.340388	1
FGSG_20050	GO:1901616	organic hydroxy compound catabolic process	15	3	FGRAMPH1_01G06607,FGRAMPH1_01G12667,FGRAMPH1_01G23751,	20	5.95	7.25	0.0126894	0.340388	1
FGSG_06895	GO:0031154	culmination involved in sorocarp development	28	4	FGRAMPH1_01G01981,FGRAMPH1_01G05589,FGRAMPH1_01G10731,FGRAMPH1_01G18851,	14.3	4.25	4.84	0.0135772	0.340388	1
FGSG_20080	GO:0006048	UDP-N-acetylglucosamine biosynthetic process	6	2	FGRAMPH1_01G15549,FGRAMPH1_01G25397,	33.3	9.91	14.46	0.0154612	0.340388	1
FGSG_06246	GO:0006047	UDP-N-acetylglucosamine metabolic process	6	2	FGRAMPH1_01G15549,FGRAMPH1_01G25397,	33.3	9.91	14.46	0.0154612	0.340388	1
FGSG_05374	GO:0015871	choline transport	6	2	FGRAMPH1_01G05463,FGRAMPH1_01G05483,	33.3	9.91	14.46	0.0154612	0.340388	1
FGSG_10177	GO:0009636	response to toxic substance	45	5	FGRAMPH1_01G03793,FGRAMPH1_01G04247,FGRAMPH1_01G10699,FGRAMPH1_01G11201,FGRAMPH1_01G11641,	11.1	3.3	3.64	0.0169192	0.340388	1
FGSG_04117	GO:1990822	basic amino acid transmembrane transport	7	2	FGRAMPH1_01G12823,FGRAMPH1_01G28033,	28.6	8.49	11.56	0.0211689	0.340388	1
FGSG_06583	GO:0019740	nitrogen utilization	7	2	FGRAMPH1_01G08323,FGRAMPH1_01G10525,	28.6	8.49	11.56	0.0211689	0.340388	1
FGSG_10003	GO:0006112	energy reserve metabolic process	7	2	FGRAMPH1_01G02133,FGRAMPH1_01G04625,	28.6	8.49	11.56	0.0211689	0.340388	1
FGSG_12547	GO:0042435	indole-containing compound biosynthetic process	7	2	FGRAMPH1_01G21835,FGRAMPH1_01G22385,	28.6	8.49	11.56	0.0211689	0.340388	1
FGSG_02251	GO:1903826	L-arginine transmembrane transport	7	2	FGRAMPH1_01G12823,FGRAMPH1_01G28033,	28.6	8.49	11.56	0.0211689	0.340388	1
FGSG_01553	GO:0019319	hexose biosynthetic process	7	2	FGRAMPH1_01G03343,FGRAMPH1_01G10353,	28.6	8.49	11.56	0.0211689	0.340388	1
FGSG_05081	GO:0006094	gluconeogenesis	7	2	FGRAMPH1_01G03343,FGRAMPH1_01G10353,	28.6	8.49	11.56	0.0211689	0.340388	1
FGSG_08013	GO:1901615	organic hydroxy compound metabolic process	102	8	FGRAMPH1_01G01281,FGRAMPH1_01G05593,FGRAMPH1_01G06607,FGRAMPH1_01G07045,FGRAMPH1_01G07527,FGRAMPH1_01G09811,FGRAMPH1_01G12667,FGRAMPH1_01G23751,	7.8	2.33	2.49	0.0212982	0.340388	1
FGSG_07685	GO:0006820	anion transport	50	5	FGRAMPH1_01G01085,FGRAMPH1_01G12823,FGRAMPH1_01G14725,FGRAMPH1_01G25919,FGRAMPH1_01G28033,	10	2.97	3.23	0.0256386	0.340388	1
FGSG_06184	GO:0060992	response to fungicide	34	4	FGRAMPH1_01G03793,FGRAMPH1_01G04247,FGRAMPH1_01G11201,FGRAMPH1_01G11641,	11.8	3.5	3.87	0.0262959	0.340388	1
FGSG_04826	GO:0030587	sorocarp development	34	4	FGRAMPH1_01G01981,FGRAMPH1_01G05589,FGRAMPH1_01G10731,FGRAMPH1_01G18851,	11.8	3.5	3.87	0.0262959	0.340388	1
FGSG_11062	GO:0099120	socially cooperative development	34	4	FGRAMPH1_01G01981,FGRAMPH1_01G05589,FGRAMPH1_01G10731,FGRAMPH1_01G18851,	11.8	3.5	3.87	0.0262959	0.340388	1
FGSG_06925	GO:0019505	resorcinol metabolic process	8	2	FGRAMPH1_01G05593,FGRAMPH1_01G09811,	25	7.43	9.64	0.0276052	0.340388	1
FGSG_08474	GO:0006857	oligopeptide transport	8	2	FGRAMPH1_01G08323,FGRAMPH1_01G10525,	25	7.43	9.64	0.0276052	0.340388	1
FGSG_09638	GO:0015807	L-amino acid transport	8	2	FGRAMPH1_01G12823,FGRAMPH1_01G28033,	25	7.43	9.64	0.0276052	0.340388	1
FGSG_13033	GO:0003333	amino acid transmembrane transport	8	2	FGRAMPH1_01G12823,FGRAMPH1_01G28033,	25	7.43	9.64	0.0276052	0.340388	1
FGSG_06154	GO:1902475	L-alpha-amino acid transmembrane transport	8	2	FGRAMPH1_01G12823,FGRAMPH1_01G28033,	25	7.43	9.64	0.0276052	0.340388	1
FGSG_09906	GO:0008150	biological process	5316	195	FGRAMPH1_01G00127,FGRAMPH1_01G00151,FGRAMPH1_01G00153,FGRAMPH1_01G00155,FGRAMPH1_01G00157,FGRAMPH1_01G00221,FGRAMPH1_01G00381,FGRAMPH1_01G00389,FGRAMPH1_01G00531,FGRAMPH1_01G00693,FGRAMPH1_01G01085,FGRAMPH1_01G01281,FGRAMPH1_01G01383,FGRAMPH1_01G01573,FGRAMPH1_01G01641,FGRAMPH1_01G01981,FGRAMPH1_01G02133,FGRAMPH1_01G02387,FGRAMPH1_01G02553,FGRAMPH1_01G03343,FGRAMPH1_01G03397,FGRAMPH1_01G03419,FGR…	3.7	1.09	1.28	0.0277032	0.340388	1
FGSG_20054	GO:0018958	phenol-containing compound metabolic process	20	3	FGRAMPH1_01G05593,FGRAMPH1_01G09811,FGRAMPH1_01G12667,	15	4.46	5.11	0.0281008	0.340388	1
FGSG_13931	GO:0009308	amine metabolic process	35	4	FGRAMPH1_01G05481,FGRAMPH1_01G05765,FGRAMPH1_01G12487,FGRAMPH1_01G21835,	11.4	3.4	3.74	0.0289277	0.340388	1
FGSG_10264	GO:0071702	organic substance transport	403	21	FGRAMPH1_01G05381,FGRAMPH1_01G05463,FGRAMPH1_01G05483,FGRAMPH1_01G05529,FGRAMPH1_01G05667,FGRAMPH1_01G06339,FGRAMPH1_01G08323,FGRAMPH1_01G09723,FGRAMPH1_01G10525,FGRAMPH1_01G10851,FGRAMPH1_01G12089,FGRAMPH1_01G12823,FGRAMPH1_01G13733,FGRAMPH1_01G13917,FGRAMPH1_01G14725,FGRAMPH1_01G15551,FGRAMPH1_01G18239,FGRAMPH1_01G18933,FGRAMPH1_01G21329,FGRAMPH1_01G21335,FGRAMPH1_01G28033,	5.2	1.55	1.62	0.0304776	0.340388	1
FGSG_01409	GO:0051703	biological process involved in intraspecies interaction between organisms	36	4	FGRAMPH1_01G01981,FGRAMPH1_01G05589,FGRAMPH1_01G10731,FGRAMPH1_01G18851,	11.1	3.3	3.63	0.0317104	0.340388	1
FGSG_04350	GO:0071786	endoplasmic reticulum tubular network organization	1	1	FGRAMPH1_01G11329,	100	29.73	inf	0.0336336	0.340388	1
FGSG_07262	GO:1903373	positive regulation of endoplasmic reticulum tubular network organization	1	1	FGRAMPH1_01G11329,	100	29.73	inf	0.0336336	0.340388	1
FGSG_05387	GO:0046041	ITP metabolic process	1	1	FGRAMPH1_01G27777,	100	29.73	inf	0.0336336	0.340388	1
FGSG_10949	GO:0015707	nitrite transport	1	1	FGRAMPH1_01G01085,	100	29.73	inf	0.0336336	0.340388	1
FGSG_06089	GO:0015706	nitrate transport	1	1	FGRAMPH1_01G01085,	100	29.73	inf	0.0336336	0.340388	1
FGSG_05932	GO:0015840	urea transport	1	1	FGRAMPH1_01G12089,	100	29.73	inf	0.0336336	0.340388	1
FGSG_06424	GO:0071788	endoplasmic reticulum tubular network maintenance	1	1	FGRAMPH1_01G11329,	100	29.73	inf	0.0336336	0.340388	1
FGSG_02641	GO:0006046	N-acetylglucosamine catabolic process	1	1	FGRAMPH1_01G25397,	100	29.73	inf	0.0336336	0.340388	1
FGSG_08943	GO:0071918	urea transmembrane transport	1	1	FGRAMPH1_01G12089,	100	29.73	inf	0.0336336	0.340388	1
FGSG_01983	GO:0006043	glucosamine catabolic process	1	1	FGRAMPH1_01G25397,	100	29.73	inf	0.0336336	0.340388	1
FGSG_12737	GO:0006069	ethanol oxidation	1	1	FGRAMPH1_01G07527,	100	29.73	inf	0.0336336	0.340388	1
FGSG_13422	GO:0006883	cellular sodium ion homeostasis	1	1	FGRAMPH1_01G02133,	100	29.73	inf	0.0336336	0.340388	1
FGSG_08375	GO:0006756	AMP phosphorylation	1	1	FGRAMPH1_01G27777,	100	29.73	inf	0.0336336	0.340388	1
FGSG_01674	GO:0055078	sodium ion homeostasis	1	1	FGRAMPH1_01G02133,	100	29.73	inf	0.0336336	0.340388	1
FGSG_02407	GO:1903371	regulation of endoplasmic reticulum tubular network organization	1	1	FGRAMPH1_01G11329,	100	29.73	inf	0.0336336	0.340388	1
FGSG_04988	GO:0048312	intracellular distribution of mitochondria	1	1	FGRAMPH1_01G17785,	100	29.73	inf	0.0336336	0.340388	1
FGSG_01379	GO:0043954	cellular component maintenance	1	1	FGRAMPH1_01G11329,	100	29.73	inf	0.0336336	0.340388	1
FGSG_05277	GO:0019310	inositol catabolic process	1	1	FGRAMPH1_01G06607,	100	29.73	inf	0.0336336	0.340388	1
FGSG_11617	GO:0042026	protein refolding	1	1	FGRAMPH1_01G19857,	100	29.73	inf	0.0336336	0.340388	1
FGSG_08941	GO:0034553	mitochondrial respiratory chain complex II assembly	1	1	FGRAMPH1_01G03343,	100	29.73	inf	0.0336336	0.340388	1
FGSG_01763	GO:0019755	one-carbon compound transport	1	1	FGRAMPH1_01G12089,	100	29.73	inf	0.0336336	0.340388	1
FGSG_03153	GO:0034552	respiratory chain complex II assembly	1	1	FGRAMPH1_01G03343,	100	29.73	inf	0.0336336	0.340388	1
FGSG_05011	GO:0046940	nucleoside monophosphate phosphorylation	1	1	FGRAMPH1_01G27777,	100	29.73	inf	0.0336336	0.340388	1
FGSG_01027	GO:0045948	positive regulation of translational initiation	1	1	FGRAMPH1_01G17785,	100	29.73	inf	0.0336336	0.340388	1
FGSG_06054	GO:0019878	lysine biosynthetic process via aminoadipic acid	9	2	FGRAMPH1_01G05425,FGRAMPH1_01G20869,	22.2	6.61	8.26	0.034715	0.340388	1
FGSG_00257	GO:0046364	monosaccharide biosynthetic process	9	2	FGRAMPH1_01G03343,FGRAMPH1_01G10353,	22.2	6.61	8.26	0.034715	0.340388	1
FGSG_02233	GO:0015819	lysine transport	9	2	FGRAMPH1_01G12823,FGRAMPH1_01G28033,	22.2	6.61	8.26	0.034715	0.340388	1
FGSG_00500	GO:0046677	response to antibiotic	38	4	FGRAMPH1_01G03793,FGRAMPH1_01G04247,FGRAMPH1_01G11201,FGRAMPH1_01G11641,	10.5	3.13	3.41	0.037732	0.365226	1
FGSG_07302	GO:0042221	response to chemical	416	21	FGRAMPH1_01G00151,FGRAMPH1_01G03793,FGRAMPH1_01G04247,FGRAMPH1_01G05463,FGRAMPH1_01G05483,FGRAMPH1_01G06607,FGRAMPH1_01G06977,FGRAMPH1_01G09723,FGRAMPH1_01G10525,FGRAMPH1_01G10699,FGRAMPH1_01G11201,FGRAMPH1_01G11241,FGRAMPH1_01G11525,FGRAMPH1_01G11527,FGRAMPH1_01G11641,FGRAMPH1_01G16547,FGRAMPH1_01G16877,FGRAMPH1_01G18195,FGRAMPH1_01G18505,FGRAMPH1_01G18933,FGRAMPH1_01G23085,	5	1.5	1.57	0.0408066	0.381186	1
FGSG_04399	GO:0044275	cellular carbohydrate catabolic process	39	4	FGRAMPH1_01G02553,FGRAMPH1_01G06607,FGRAMPH1_01G06757,FGRAMPH1_01G23751,	10.3	3.05	3.32	0.0409719	0.381186	1
FGSG_12296	GO:0030639	polyketide biosynthetic process	77	6	FGRAMPH1_01G03793,FGRAMPH1_01G05593,FGRAMPH1_01G09811,FGRAMPH1_01G14573,FGRAMPH1_01G20127,FGRAMPH1_01G26881,	7.8	2.32	2.46	0.0445433	0.381186	1
FGSG_20056	GO:0019318	hexose metabolic process	24	3	FGRAMPH1_01G01281,FGRAMPH1_01G03343,FGRAMPH1_01G10353,	12.5	3.72	4.14	0.0452366	0.381186	1
FGSG_09552	GO:0005975	carbohydrate metabolic process	348	18	FGRAMPH1_01G00389,FGRAMPH1_01G01281,FGRAMPH1_01G02133,FGRAMPH1_01G02553,FGRAMPH1_01G03343,FGRAMPH1_01G05623,FGRAMPH1_01G06607,FGRAMPH1_01G06757,FGRAMPH1_01G10353,FGRAMPH1_01G11857,FGRAMPH1_01G12507,FGRAMPH1_01G15293,FGRAMPH1_01G16403,FGRAMPH1_01G23427,FGRAMPH1_01G23751,FGRAMPH1_01G24967,FGRAMPH1_01G25391,FGRAMPH1_01G25397,	5.2	1.54	1.6	0.045828	0.381186	1
FGSG_10200	GO:0071555	cell wall organization	59	5	FGRAMPH1_01G06977,FGRAMPH1_01G11857,FGRAMPH1_01G15293,FGRAMPH1_01G20431,FGRAMPH1_01G25391,	8.5	2.52	2.69	0.0476029	0.381186	1
FGSG_02983
FGSG_11900
FGSG_03326
FGSG_01224
FGSG_07692
FGSG_02427
FGSG_02264
FGSG_04088
FGSG_02292
FGSG_02881
FGSG_09969
FGSG_08942
FGSG_09524
FGSG_09042
FGSG_05826
FGSG_12474
FGSG_11310
FGSG_03460
FGSG_03593
FGSG_05130
FGSG_02880
FGSG_02321
FGSG_08736
FGSG_02094
FGSG_03286
FGSG_12647
FGSG_04429
FGSG_09980
FGSG_04841
FGSG_03236
FGSG_04093
FGSG_02327
FGSG_02326
FGSG_04879
FGSG_12164
FGSG_02751
FGSG_04544
FGSG_02883
FGSG_05601
FGSG_07611
FGSG_02402
FGSG_01561
FGSG_11345
FGSG_09341
FGSG_01712
FGSG_00522
FGSG_07303
FGSG_05798
FGSG_00652
FGSG_03300
FGSG_12492
FGSG_03732
FGSG_04034
FGSG_08749
FGSG_02343
FGSG_01745
FGSG_04204
FGSG_02271
FGSG_04439
FGSG_00070
FGSG_06108
FGSG_03856
FGSG_07610
FGSG_07612
FGSG_09887
FGSG_04134
FGSG_07833
FGSG_03349
FGSG_01588
FGSG_02551
FGSG_10772
FGSG_11981
FGSG_06526
FGSG_04605
FGSG_04302
FGSG_05310
FGSG_05554
FGSG_02322
FGSG_03278
FGSG_13562
FGSG_00143
FGSG_01764
FGSG_06551
FGSG_03959
FGSG_02272
FGSG_02903
FGSG_02750
FGSG_03111
FGSG_00002
FGSG_07136
FGSG_06480
FGSG_05075
FGSG_05947
FGSG_03894
FGSG_12935
FGSG_05682
FGSG_05859
FGSG_04194
FGSG_03230
FGSG_02882
FGSG_13383
FGSG_12396
FGSG_00664
FGSG_07690
FGSG_00140
FGSG_03452
FGSG_13314
FGSG_01252
FGSG_12475
FGSG_02589
FGSG_03158
FGSG_02220
FGSG_02160
FGSG_03412
FGSG_00076
FGSG_05446
FGSG_03799
FGSG_09098
FGSG_06676
FGSG_09277
FGSG_10339
FGSG_02104
FGSG_02550
FGSG_08973
FGSG_07495
FGSG_09539
FGSG_10983
FGSG_04987
FGSG_08378
FGSG_00142
FGSG_14018
FGSG_05334
FGSG_11888
FGSG_03314
FGSG_01555
FGSG_08397
FGSG_02823
FGSG_05656
FGSG_04283
FGSG_07691
FGSG_00554
FGSG_09723
FGSG_07894
FGSG_00036
FGSG_03592
FGSG_10338
FGSG_08172
FGSG_09195
FGSG_01018
FGSG_03688
FGSG_11480
FGSG_10300
FGSG_00681
FGSG_05574
FGSG_07017
FGSG_05679
FGSG_00620
FGSG_00619
FGSG_02464
FGSG_01378
FGSG_02330
FGSG_02159
FGSG_09749
FGSG_03017
FGSG_06359
FGSG_02828
FGSG_06564
FGSG_02864
FGSG_00047
FGSG_06493
FGSG_00416
FGSG_12129
FGSG_11150
FGSG_05584
FGSG_11439
FGSG_05063
FGSG_13637
FGSG_10241
FGSG_04740
FGSG_03898
FGSG_10800
FGSG_02323
FGSG_08463
FGSG_10522
FGSG_06287
FGSG_00483
FGSG_03729
FGSG_05959
FGSG_13412
FGSG_06109
FGSG_01088
FGSG_06752
FGSG_11147
FGSG_02499
FGSG_07891
FGSG_09832
FGSG_00602
FGSG_02433
FGSG_13008
FGSG_05349
FGSG_07689
FGSG_03956
FGSG_03528
FGSG_03288
FGSG_06751
FGSG_03327
FGSG_12563
FGSG_07066
FGSG_00046
FGSG_12597
FGSG_08702
FGSG_10752
FGSG_10914
FGSG_04023
FGSG_03265
FGSG_12248
FGSG_10337
FGSG_11479
FGSG_12493
FGSG_01993
FGSG_05741
FGSG_05620
FGSG_07072
FGSG_05269
FGSG_11980
FGSG_13675
FGSG_01390
FGSG_05309
FGSG_08347
FGSG_02324
FGSG_02339
FGSG_11381
FGSG_08137
FGSG_10796
FGSG_00049
FGSG_00947
FGSG_10333
FGSG_07911
FGSG_07767
FGSG_11232
FGSG_03524
FGSG_02899
FGSG_05481
FGSG_05750
FGSG_09364
FGSG_08601
FGSG_07503
FGSG_04207
FGSG_06888
FGSG_08669
FGSG_09625
FGSG_05146
FGSG_08816
FGSG_08587
FGSG_03846
FGSG_10969
FGSG_00196
FGSG_10296
FGSG_02675
FGSG_00852
FGSG_05375
FGSG_02420
FGSG_11385
FGSG_06307
FGSG_13090
FGSG_00470
FGSG_07251
FGSG_02730
FGSG_13378
FGSG_01916
FGSG_07832
FGSG_09162
FGSG_02207
FGSG_02379
FGSG_05654
FGSG_04543
FGSG_08799
FGSG_08924
FGSG_10007
FGSG_12767
FGSG_00742
FGSG_00542
FGSG_12596
FGSG_09053
FGSG_00741
FGSG_12409
FGSG_02820
FGSG_04330
FGSG_01193
FGSG_09567
FGSG_04958
FGSG_04428
FGSG_09759
FGSG_13056
FGSG_03214
FGSG_09547
FGSG_01544
FGSG_11797
FGSG_03293
FGSG_13112
FGSG_00790
FGSG_01356
FGSG_09070
FGSG_04529
FGSG_08559
FGSG_10952
FGSG_04512
FGSG_11776
FGSG_03728
FGSG_03015
FGSG_03869
FGSG_02358
